# Supplementary material for: Discovery of structurally diverse sesquiterpenoids from Streptomyces fulvorobeus isolated from Elephas maximus feces and their antifungal activities
Source: PubMed Central journal article supplement (PMC11609139; doi:10.1007/s13659-024-00481-9), 2024-12-02
Supplement: 13659_2024_481_MOESM1_ESM.pdf [file 13659_2024_481_MOESM1_ESM.pdf]

## Supplementary Information

### **Discovery of structurally diverse sesquiterpenoids from *Streptomyces fulvorobeus* isolated from *Elephas maximus* feces and their antifungal activities**

Lu Cao<sup>1</sup>, Jun-Feng Tan<sup>1</sup>, Zeng-Guang Zhang<sup>1</sup>, Jun-Wei Yang<sup>1</sup>, Yu Mu<sup>1</sup>, Zhi-Long Zhao<sup>2</sup>, Yi Jiang<sup>3\*</sup>, Xue-Shi Huang<sup>1\*</sup> and Li Han<sup>1\*</sup>

<sup>1</sup> Institute of Microbial Pharmaceuticals, College of Life and Health Sciences, Northeastern University, Shenyang, 110819, China

<sup>2</sup> Pharmacological Laboratory, Liaoning Provincial Institute of Drug Inspection and Testing, Shenyang, 110036, China

<sup>3</sup> Yunnan Institute of Microbiology, Yunnan University, Kunming, 650091, China

\*Correspondence:

Yi Jiang

jiangyi@ynu.edu.cn

Xue-Shi Huang

huangxs@mail.neu.edu.cn

Li Han

hanli@mail.neu.edu.cn.

Table S1.  $^1\text{H}$  NMR (600 MHz) and  $^{13}\text{C}$  NMR (150 MHz) data for compound **26** in pyridine- $d_5$

Table S2. Antifungal activities of test compounds (MIC  $\mu\text{g/mL}$ , MIC<sub>80</sub>  $\mu\text{g/mL}$ )

Table S3. Antibacterial activities of compounds **5–7** (MIC  $\mu\text{g/mL}$ )

Figure S1. HRESI-MS spectrum of the new compound **1**

Figure S2.  $^1\text{H}$  NMR (600 MHz, DMSO- $d_6$ ) spectrum of the new compound **1**

Figure S3.  $^{13}\text{C}$  NMR (150 MHz, DMSO- $d_6$ ) spectrum of the new compound **1**

Figure S4. HSQC spectrum of the new compound **1**

Figure S5. HMBC spectrum of the new compound **1**

Figure S6. COSY spectrum of the new compound **1**

Figure S7. NOESY spectrum of the new compound **1**

Figure S8.  $^1\text{H}$  NMR (600 MHz, in pyridine- $d_5$ ) spectrum of the new compound **1**

Figure S9.  $^1\text{H}$  NMR spectrum of (*S*)-MTPA ester (**1a**) in pyridine- $d_5$

Figure S10.  $^1\text{H}$  NMR spectrum of (*R*)-MTPA ester (**1b**) in pyridine- $d_5$

Figure S11. Comparison of  $^1\text{H}$  NMR spectra of (*S*)-MTPA ester (**1a**) and (*R*)-MTPA ester (**1b**) in pyridine- $d_5$

Figure S12. HRESI-MS spectrum of the new compound **2**

Figure S13.  $^1\text{H}$  NMR (600 MHz, DMSO- $d_6$ ) spectrum of the new compound **2**

Figure S14.  $^{13}\text{C}$  NMR (150 MHz, DMSO- $d_6$ ) spectrum of the new compound **2**

Figure S15. HSQC spectrum of the new compound **2**

Figure S16. HMBC spectrum of the new compound **2**

Figure S17. COSY spectrum of the new compound **2**

Figure S18. NOESY spectrum of the new compound **2**

Figure S19.  $^1\text{H}$  NMR (600 MHz, in pyridine- $d_5$ ) spectrum of the new compound **2**

Figure S20.  $^1\text{H}$  NMR spectrum of (*S*)-MTPA ester (**2a**) in pyridine- $d_5$

Figure S21.  $^1\text{H}$  NMR spectrum of (*R*)-MTPA ester (**2b**) in pyridine- $d_5$

Figure S22. Comparison of  $^1\text{H}$  NMR spectra of (*S*)-MTPA ester (**2a**) and (*R*)-MTPA ester (**2b**) in pyridine- $d_5$

Figure S23. HRESI-MS spectrum of the new compound **3**

Figure S24.  $^1\text{H}$  NMR (600 MHz, DMSO- $d_6$ ) spectrum of the new compound **3**

Figure S25.  $^{13}\text{C}$  NMR (150 MHz,  $\text{DMSO-}d_6$ ) spectrum of the new compound **3**

Figure S26. HSQC spectrum of the new compound **3**

Figure S27. HMBC spectrum of the new compound **3**

Figure S28. COSY spectrum of the new compound **3**

Figure S29. NOESY spectrum of the new compound **3**

Figure S30.  $^1\text{H}$  NMR (600 MHz, in pyridine- $d_5$ ) spectrum of the new compound **3**

Figure S31.  $^1\text{H}$  NMR spectrum of (*S*)-MTPA ester (**3a**) in pyridine- $d_5$

Figure S32.  $^1\text{H}$  NMR spectrum of (*R*)-MTPA ester (**3b**) in pyridine- $d_5$

Figure S33. Comparison of  $^1\text{H}$  NMR spectra of (*S*)-MTPA ester (**3a**) and (*R*)-MTPA ester (**3b**) in pyridine- $d_5$

Figure S34. HRESI-MS spectrum of the new compound **4**

Figure S35.  $^1\text{H}$  NMR (600 MHz,  $\text{DMSO-}d_6$ ) spectrum of the new compound **4**

Figure S36.  $^{13}\text{C}$  NMR (150 MHz,  $\text{DMSO-}d_6$ ) spectrum of the new compound **4**

Figure S37. HSQC spectrum of the new compound **4**

Figure S38. HMBC spectrum of the new compound **4**

Figure S39. COSY spectrum of the new compound **4**

Figure S40. NOESY spectrum of the new compound **4**

Figure S41. HRESI-MS spectrum of the new compound **13**

Figure S42.  $^1\text{H}$  NMR (600 MHz,  $\text{DMSO-}d_6$ ) spectrum of the new compound **13**

Figure S43.  $^{13}\text{C}$  NMR (150 MHz,  $\text{DMSO-}d_6$ ) spectrum of the new compound **13**

Figure S44. HSQC spectrum of the new compound **13**

Figure S45. HMBC spectrum of the new compound **13**

Figure S46. COSY spectrum of the new compound **13**

Figure S47. NOESY spectrum of the new compound **13**

Figure S48. HRESI-MS spectrum of the new compound **14**

Figure S49.  $^1\text{H}$  NMR (600 MHz,  $\text{DMSO-}d_6$ ) spectrum of the new compound **14**

Figure S50.  $^{13}\text{C}$  NMR (150 MHz,  $\text{DMSO-}d_6$ ) spectrum of the new compound **14**

Figure S51. HSQC spectrum of the new compound **14**

Figure S52. HMBC spectrum of the new compound **14**

Figure S53. COSY spectrum of the new compound **14**

Figure S54. NOESY spectrum of the new compound **14**

Figure S55. HRESI-MS spectrum of the new compound **15**

Figure S56.  $^1\text{H}$  NMR (600 MHz,  $\text{DMSO-}d_6$ ) spectrum of the new compound **15**

Figure S57.  $^{13}\text{C}$  NMR (150 MHz,  $\text{DMSO-}d_6$ ) spectrum of the new compound **15**

Figure S58. HSQC spectrum of the new compound **15**

Figure S59. HMBC spectrum of the new compound **15**

Figure S60. COSY spectrum of the new compound **15**

Figure S61. NOESY spectrum of the new compound **15**

Figure S62. HRESI-MS spectrum of the new compound **17**

Figure S63.  $^1\text{H}$  NMR (600 MHz,  $\text{DMSO-}d_6$ ) spectrum of the new compound **17**

Figure S64.  $^{13}\text{C}$  NMR (150 MHz,  $\text{DMSO-}d_6$ ) spectrum of the new compound **17**

Figure S65. HSQC spectrum of the new compound **17**

Figure S66. HMBC spectrum of the new compound **17**

Figure S67. COSY spectrum of the new compound **17**

Figure S68. NOESY spectrum of the new compound **17**

Figure S69. HRESI-MS spectrum of the new compound **18**

Figure S70.  $^1\text{H}$  NMR (600 MHz,  $\text{DMSO-}d_6$ ) spectrum of the new compound **18**

Figure S71.  $^{13}\text{C}$  NMR (150 MHz,  $\text{DMSO-}d_6$ ) spectrum of the new compound **18**

Figure S72. HSQC spectrum of the new compound **18**

Figure S73. HMBC spectrum of the new compound **18**

Figure S74. COSY spectrum of the new compound **18**

Figure S75. NOESY spectrum of the new compound **18**

Figure S76. HRESI-MS spectrum of the new compound **22**

Figure S77.  $^1\text{H}$  NMR (600 MHz,  $\text{DMSO-}d_6$ ) spectrum of the new compound **22**

Figure S78.  $^{13}\text{C}$  NMR (150 MHz,  $\text{DMSO-}d_6$ ) spectrum of the new compound **22**

Figure S79. HSQC spectrum of the new compound **22**

Figure S80. HMBC spectrum of the new compound **22**

Figure S81. COSY spectrum of the new compound **22**

Figure S82. NOESY spectrum of the new compound **22**

Figure S83. HRESI-MS spectrum of the new compound **23**

Figure S84.  $^1\text{H}$  NMR (600 MHz,  $\text{DMSO-}d_6$ ) spectrum of the new compound **23**

Figure S85.  $^{13}\text{C}$  NMR (150 MHz,  $\text{DMSO-}d_6$ ) spectrum of the new compound **23**

Figure S86. HSQC spectrum of the new compound **23**

Figure S87. HMBC spectrum of the new compound **23**

Figure S88. COSY spectrum of the new compound **23**

Figure S89. NOESY spectrum of the new compound **23**

Figure S90. HRESI-MS spectrum of the new compound **25**

Figure S91.  $^1\text{H}$  NMR (600 MHz,  $\text{DMSO-}d_6$ ) spectrum of the new compound **25**

Figure S92.  $^{13}\text{C}$  NMR (150 MHz,  $\text{DMSO-}d_6$ ) spectrum of the new compound **25**

Figure S93. HSQC spectrum of the new compound **25**

Figure S94. HMBC spectrum of the new compound **25**

Figure S95. COSY spectrum of the new compound **25**

Figure S96. NOESY spectrum of the new compound **25**

Figure S97. HRESI-MS spectrum of the new compound **26**

Figure S98.  $^1\text{H}$  NMR (600 MHz,  $\text{DMSO-}d_6$ ) spectrum of the new compound **26**

Figure S99.  $^{13}\text{C}$  NMR (150 MHz,  $\text{DMSO-}d_6$ ) spectrum of the new compound **26**

Figure S100. HSQC spectrum of the new compound **26**

Figure S101. HMBC spectrum of the new compound **26**

Figure S102. COSY spectrum of the new compound **26**

Figure S103. NOESY spectrum of the new compound **26**

Figure S104.  $^1\text{H}$  NMR (600 MHz, in pyridine- $d_5$ ) spectrum of the new compound **26**

Figure S105.  $^{13}\text{C}$  NMR (150 MHz, in pyridine- $d_5$ ) spectrum of the new compound **26**

Figure S106. HSQC spectrum of the new compound **26** in pyridine- $d_5$

Figure S107. HMBC spectrum of the new compound **26** in pyridine- $d_5$

Figure S108. COSY spectrum of the new compound **26** in pyridine- $d_5$

Figure S109. NOESY spectrum of the new compound **26** in pyridine- $d_5$

Figure S110. HRESI-MS spectrum of the new compound **27**

Figure S111.  $^1\text{H}$  NMR (600 MHz,  $\text{DMSO-}d_6$ ) spectrum of the new compound **27**  
Figure S112.  $^{13}\text{C}$  NMR (150 MHz,  $\text{DMSO-}d_6$ ) spectrum of the new compound **27**  
Figure S113. HSQC spectrum of the new compound **27**  
Figure S114. HMBC spectrum of the new compound **27**  
Figure S115. COSY spectrum of the new compound **27**  
Figure S116. NOESY spectrum of the new compound **27**  
Figure S117. HRESI-MS spectrum of the new compound **28**  
Figure S118.  $^1\text{H}$  NMR (600 MHz,  $\text{DMSO-}d_6$ ) spectrum of the new compound **28**  
Figure S119.  $^{13}\text{C}$  NMR (150 MHz,  $\text{DMSO-}d_6$ ) spectrum of the new compound **28**  
Figure S120. HSQC spectrum of the new compound **28**  
Figure S121. HMBC spectrum of the new compound **28**  
Figure S122. COSY spectrum of the new compound **28**  
Figure S123. NOESY spectrum of the new compound **28**  
Figure S124. Experimental ECD spectra and calculated ECD spectra of compound **12**

Table S1 <sup>1</sup>H NMR (600 MHz) and <sup>13</sup>C NMR (150 MHz) data for compound **26** in pyridine-*d*<sub>5</sub>

| no.   | $\delta_C$ , type     | $\delta_H$ (J in Hz)       | HMBC                 | NOESY     |
|-------|-----------------------|----------------------------|----------------------|-----------|
| 1     | 25.4, CH              | 1.44, m                    |                      | H-7       |
| 2     | 27.6, CH <sub>2</sub> | 2.25, m                    | 1.80, m              |           |
| 3     | 38.9, CH <sub>2</sub> | 1.81, m                    | 1.37, m              |           |
| 4     | 80.3, C               |                            |                      |           |
| 5     | 38.1, CH              | 1.77, m                    | C-1, C-3, C-4, C-6   | H-7       |
| 6     | 24.8, CH              | 0.55, dt (10.2, 3.3)       | C-2, C-4             | H-15      |
| 7     | 53.7, CH              | 1.08, ddd (10.2, 8.3, 3.7) | C-6, C-9, C-11, C-12 | H-1, H-5  |
| 8     | 29.4, CH <sub>2</sub> | 2.30, m                    | 1.90, m              |           |
| 9     | 41.0, CH <sub>2</sub> | 2.18, m                    | 1.75, m              | C-8, C-10 |
| 10    | 68.7, CH              | 4.09, m                    |                      |           |
| 11    | 74.4, C               |                            |                      |           |
| 12    | 27.9, CH <sub>3</sub> | 1.48, s                    | C-7, C-11, C-13      |           |
| 13    | 31.6, CH <sub>3</sub> | 1.57, s                    | C-7, C-11, C-12      |           |
| 14    | 25.4, CH <sub>3</sub> | 1.42, d (6.2)              | C-9, C-10            |           |
| 15    | 27.4, CH <sub>3</sub> | 1.67, s                    | C-3, C-4, C-5        | H-6       |
| 4-OH  |                       | 5.71, s                    |                      |           |
| 10-OH |                       | 5.80, s                    |                      |           |
| 11-OH |                       | 5.32, s                    |                      |           |

Table S2 Antifungal activities of test compounds (MIC  $\mu$ g/mL, MIC<sub>80</sub>  $\mu$ g/mL)

| Comp      | <i>C. albicans</i> |                   | <i>C. parapsilosis</i> |                   | <i>C. neoformans</i> |                   | <i>C. gattii</i> |                   |
|-----------|--------------------|-------------------|------------------------|-------------------|----------------------|-------------------|------------------|-------------------|
|           | MIC                | MIC <sub>80</sub> | MIC                    | MIC <sub>80</sub> | MIC                  | MIC <sub>80</sub> | MIC              | MIC <sub>80</sub> |
| <b>5</b>  | >400               | 100               | >400                   | 100               | >400                 | >400              | >400             | >400              |
| <b>6</b>  | >400               | 200               | >400                   | 200               | >400                 | >400              | >400             | >400              |
| <b>7</b>  | >400               | 200               | >400                   | 100               | >400                 | >400              | >400             | >400              |
| <b>9</b>  | >400               | 100               | >400                   | 100               | >400                 | >400              | >400             | >400              |
| <b>12</b> | >400               | 200               | >400                   | 200               | >400                 | >400              | >400             | >400              |
| <b>31</b> | >400               | 200               | >400                   | 100               | >400                 | >400              | >400             | >400              |
| <b>32</b> | >400               | 400               | >400                   | 400               | >400                 | >400              | >400             | >400              |
| <b>33</b> | >400               | 400               | >400                   | 400               | >400                 | >400              | >400             | >400              |
| <b>34</b> | >400               | >400              | >400                   | >400              | 50                   | 25                | 50               | 25                |
| AmB       | 2                  | 0.5               | 2                      | 0.5               | 2                    | 0.25              | 2                | 0.25              |

AmB, amphotericin B was served as the positive control.

Table S3 Antibacterial activities of compounds **5–7** (MIC  $\mu$ g/mL)

| Comp     | MIC                |                  |                   |                |                      |
|----------|--------------------|------------------|-------------------|----------------|----------------------|
|          | <i>B. subtilis</i> | <i>S. aureus</i> | <i>E. faecium</i> | <i>E. coli</i> | <i>P. aeruginosa</i> |
| <b>5</b> | 100                | >200             | 200               | 100            | >200                 |
| <b>6</b> | 200                | >200             | 200               | 200            | >200                 |
| <b>7</b> | >200               | >200             | >200              | 200            | >200                 |
| Cip      | 0.13               | 0.13             | 0.25              | 0.13           | 0.13                 |

Cip, Ciprofloxacin was served as the positive control.

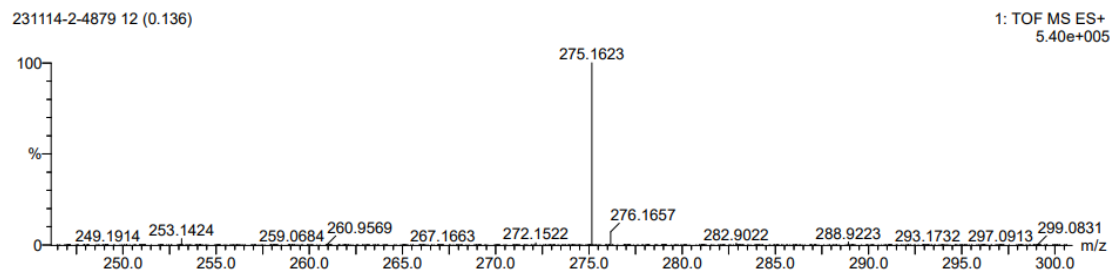

Figure S1. HRESI-MS spectrum of the new compound **1**

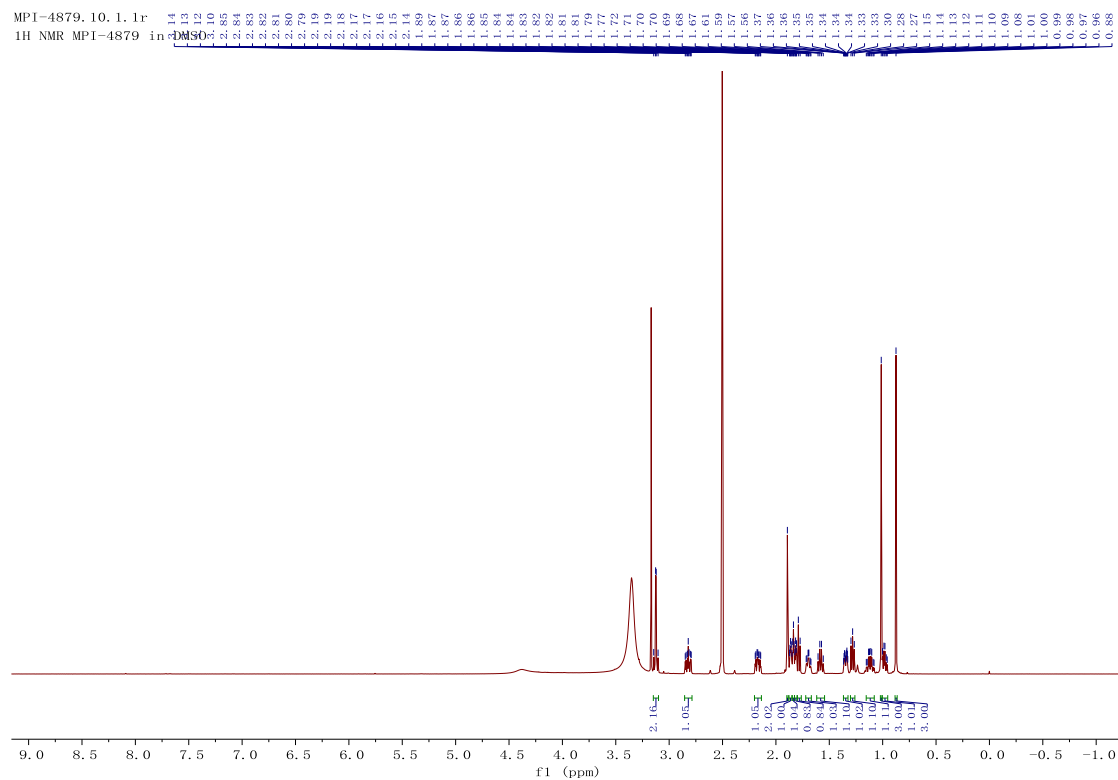

Figure S2. <sup>1</sup>H NMR (600 MHz, DMSO-*d*<sub>6</sub>) spectrum of the new compound **1**



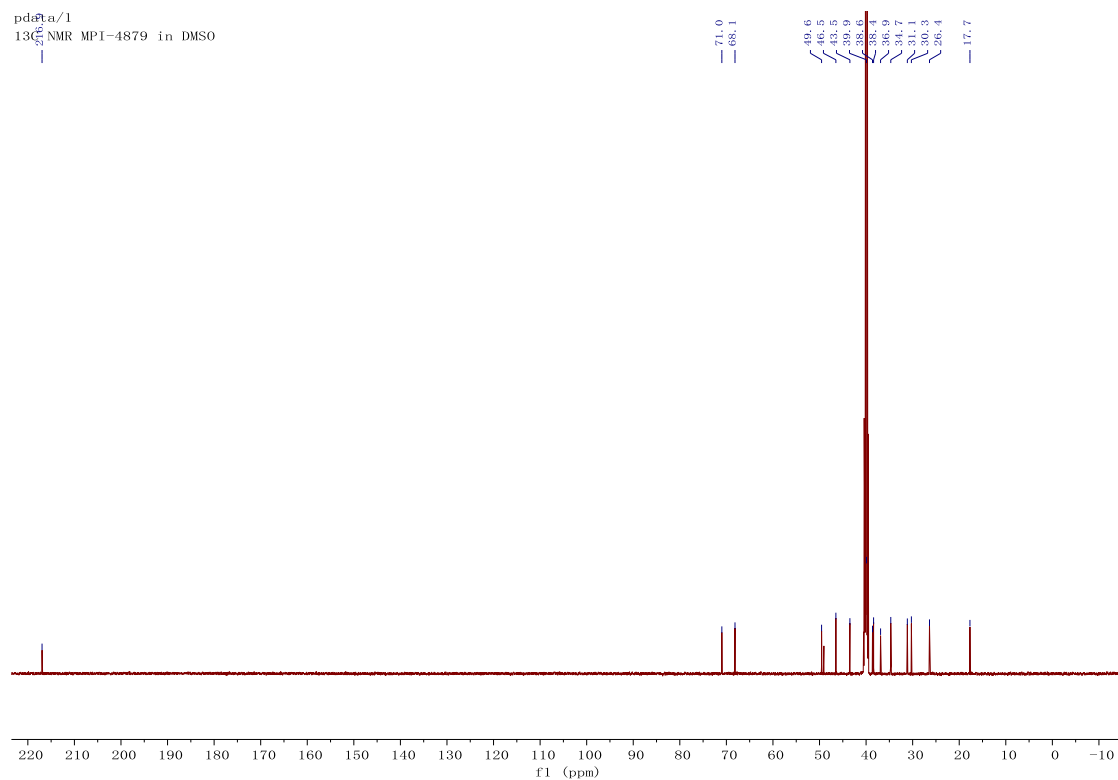

Figure S3.  $^{13}\text{C}$  NMR (150 MHz,  $\text{DMSO-}d_6$ ) spectrum of the new compound **1**

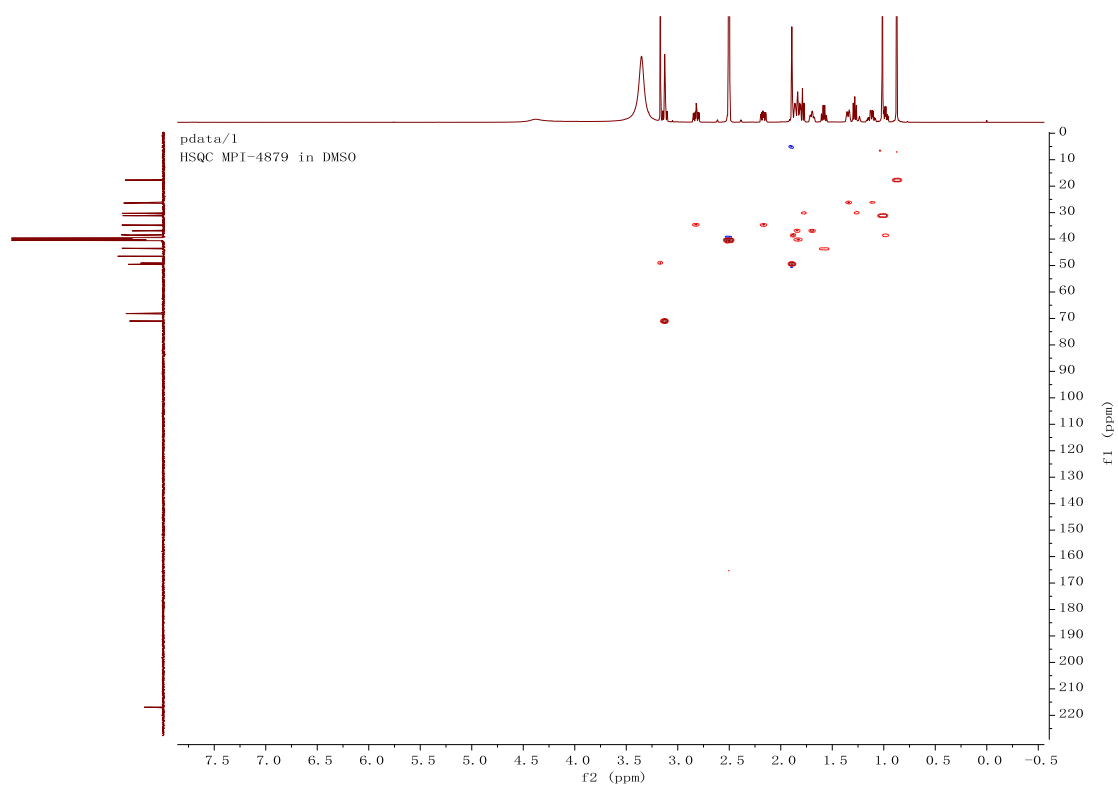

Figure S4. HSQC spectrum of the new compound **1**

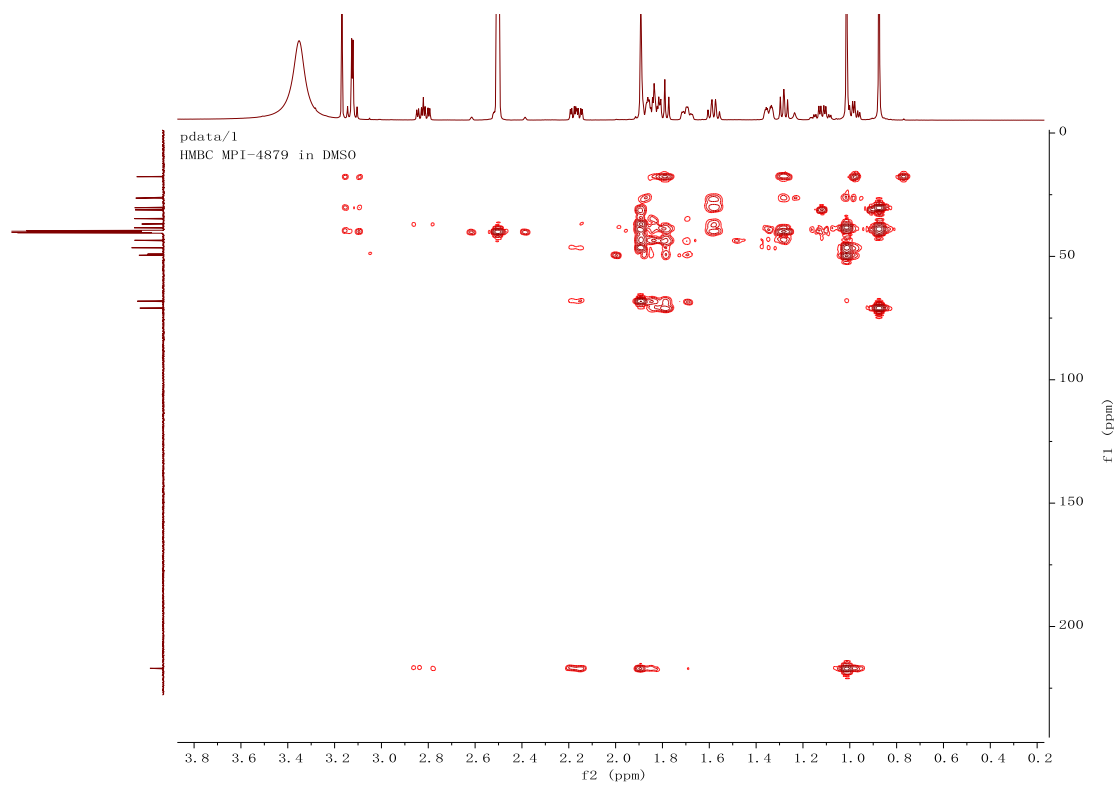

Figure S5. HMBC spectrum of the new compound **1**

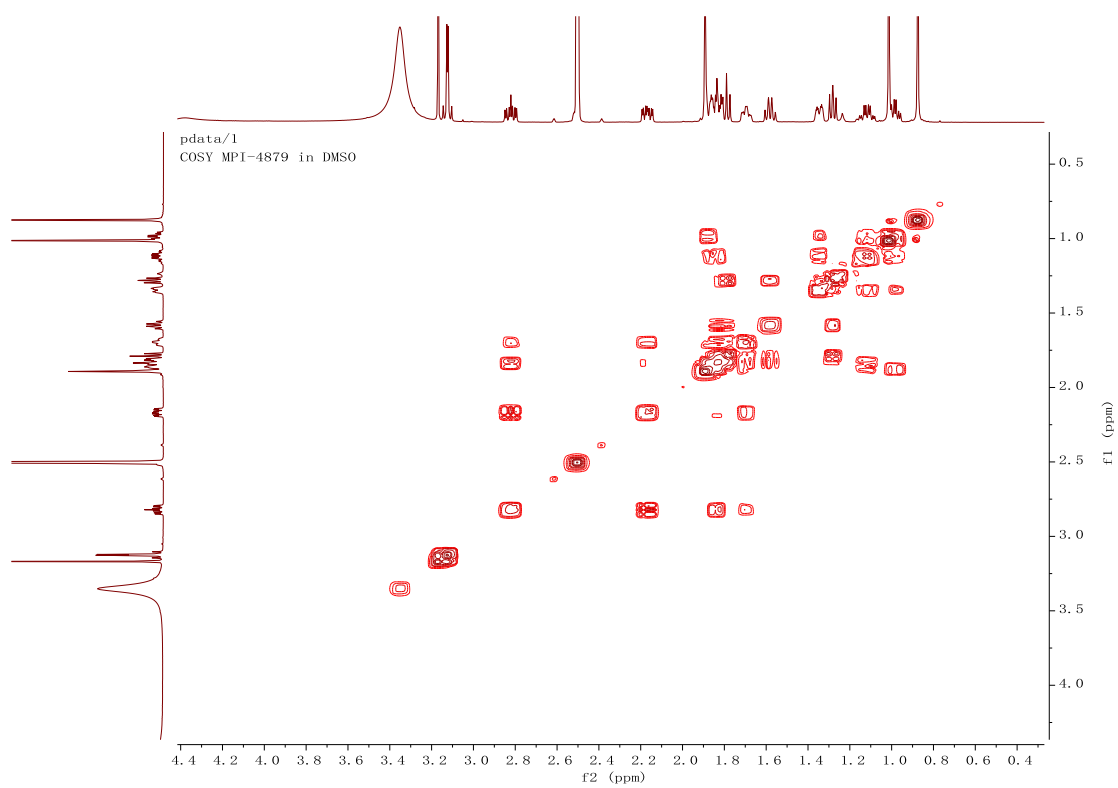

Figure S6. COSY spectrum of the new compound **1**

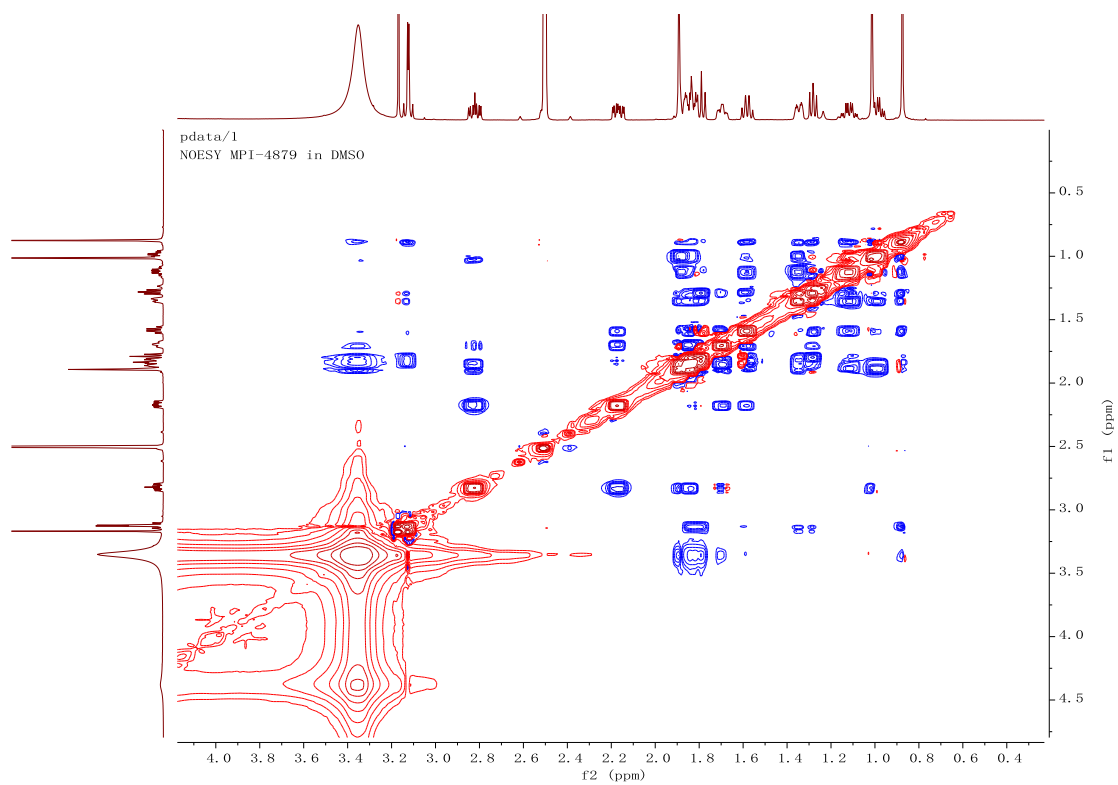

Figure S7. NOESY spectrum of the new compound **1**

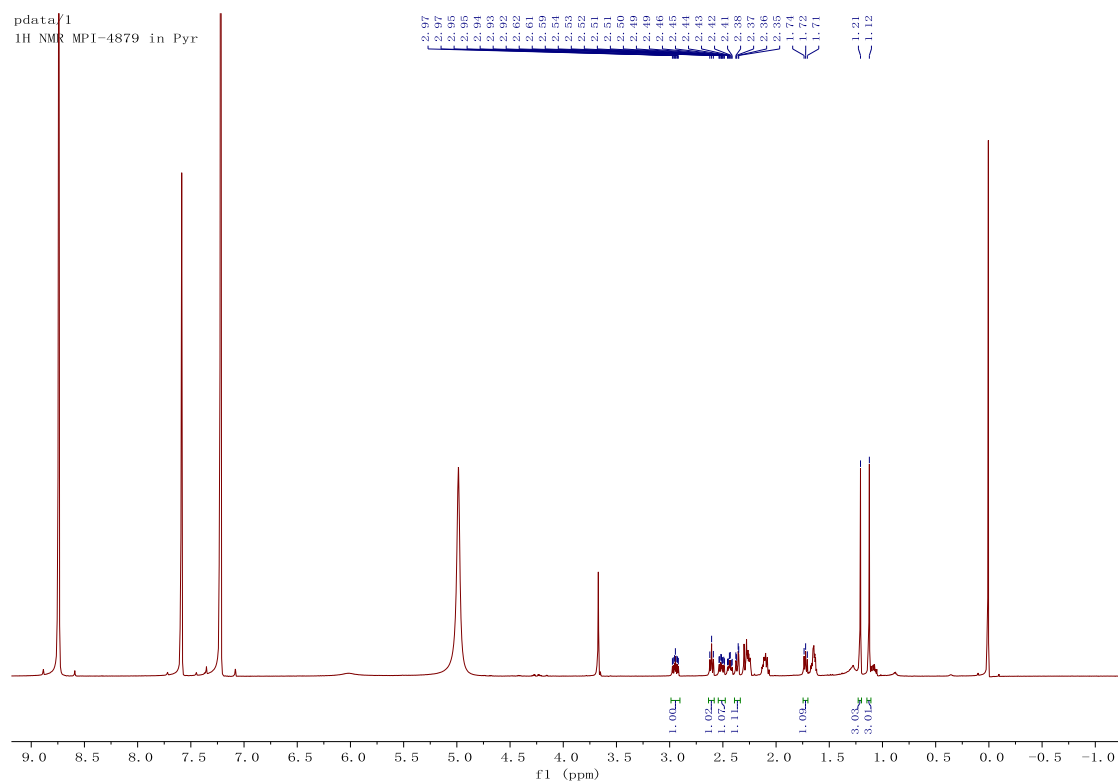

Figure S8.  $^1\text{H}$  NMR (600 MHz, in pyridine- $d_5$ ) spectrum of the new compound **1**

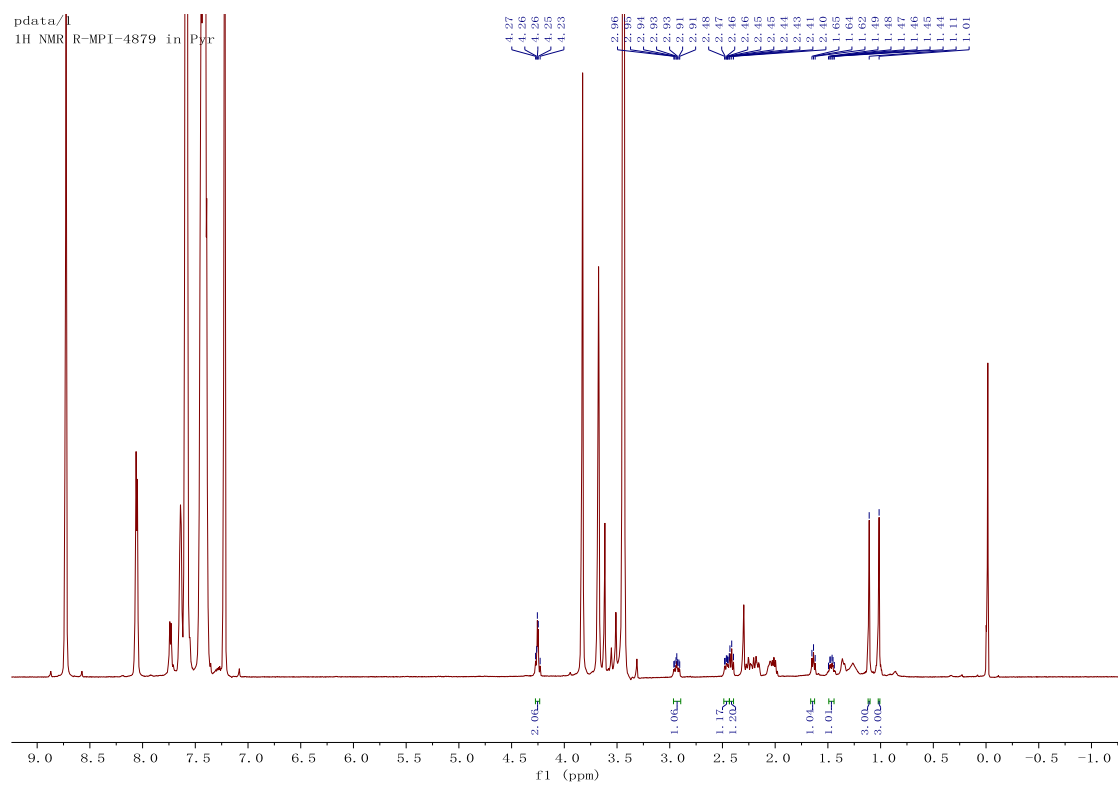

Figure S9.  $^1\text{H}$  NMR spectrum of (*S*)-MTPA ester (**1a**) in pyridine- $d_5$

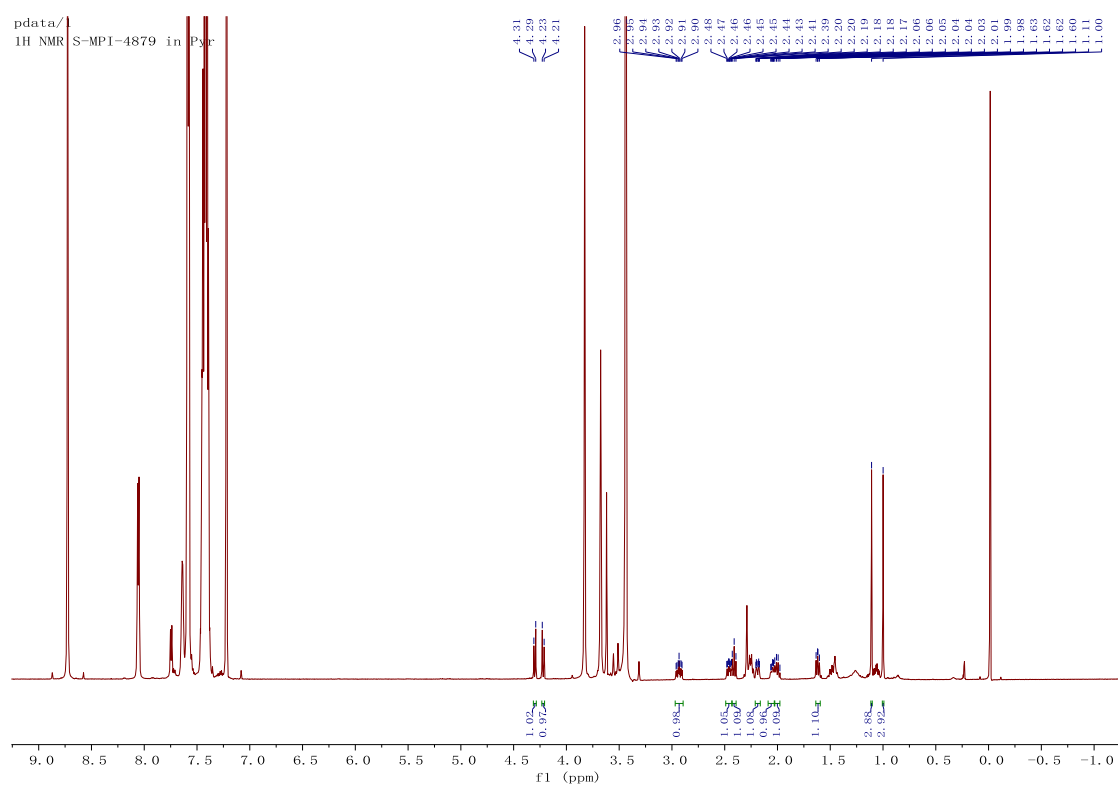

Figure S10.  $^1\text{H}$  NMR spectrum of (*R*)-MTPA ester (**1b**) in pyridine- $d_5$

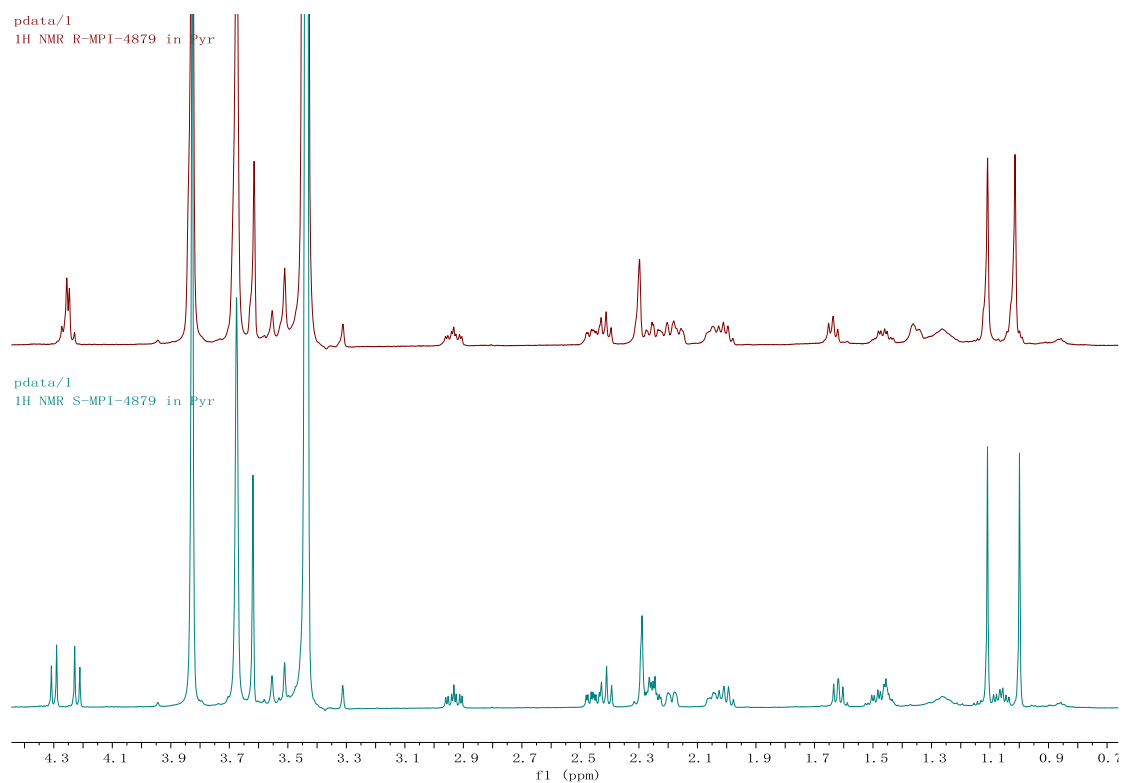

Figure S11. Comparison of <sup>1</sup>H NMR spectra of (*S*)-MTPA ester (**1a**) and (*R*)-MTPA ester (**1b**) in pyridine-*d*<sub>5</sub>

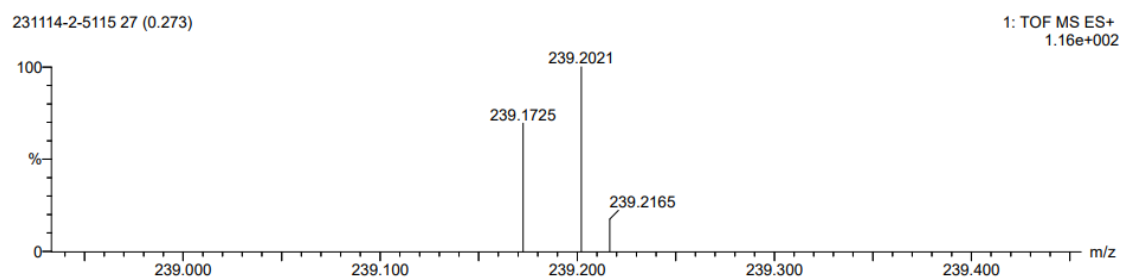

Figure S12. HRESI-MS spectrum of the new compound **2**

MPI-5115.10.1.1r  
1H NMR MPI-5115 in DMSO

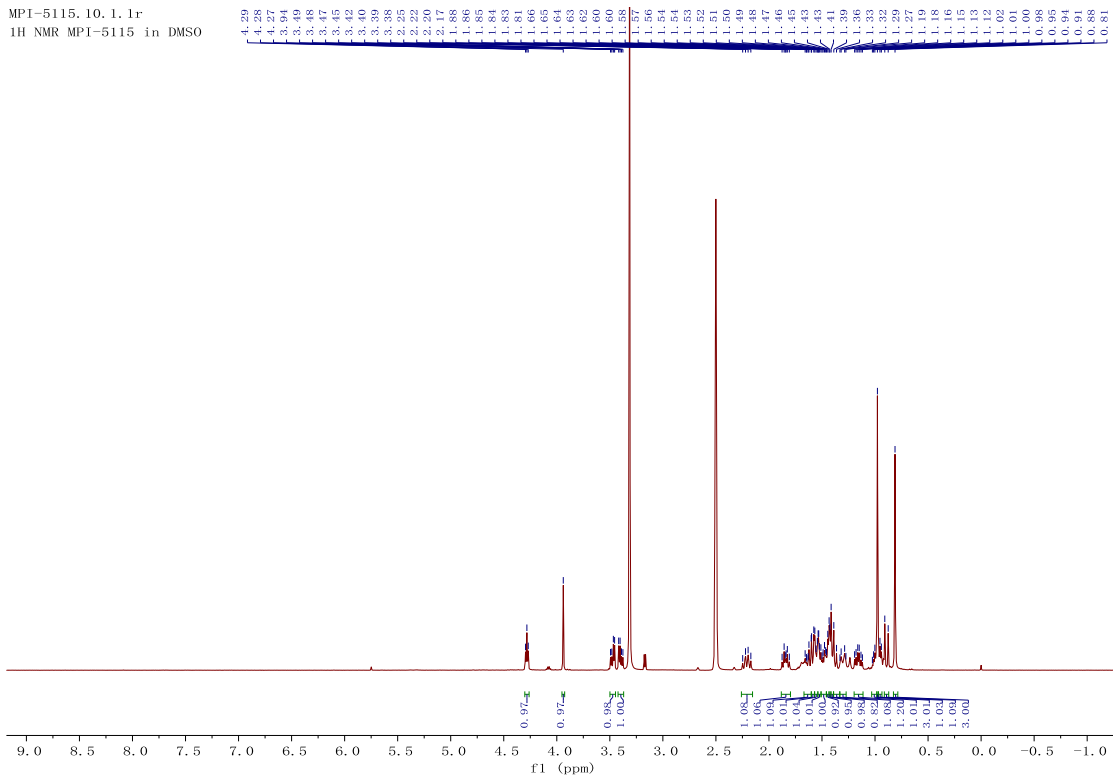

Figure S13.  $^1\text{H}$  NMR (600 MHz,  $\text{DMSO-}d_6$ ) spectrum of the new compound **2**

MPI-5115.20.1.1r  
13C NMR MPI-5115 in DMSO

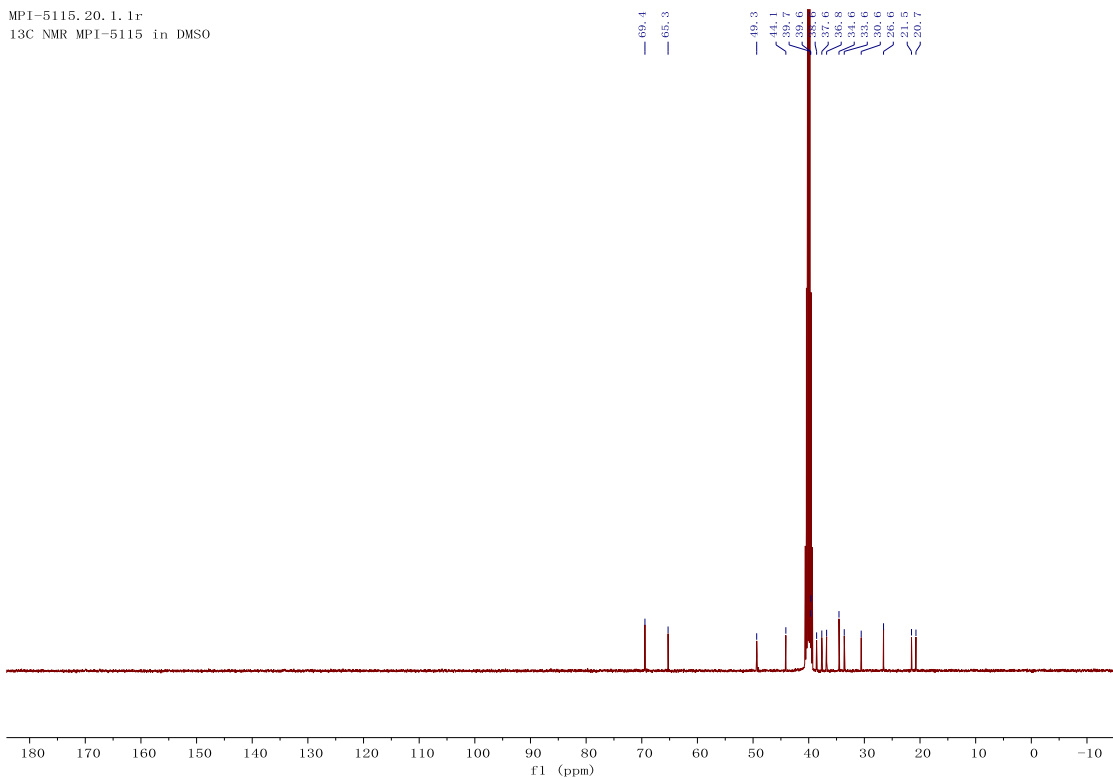

Figure S14.  $^{13}\text{C}$  NMR (150 MHz,  $\text{DMSO-}d_6$ ) spectrum of the new compound **2**

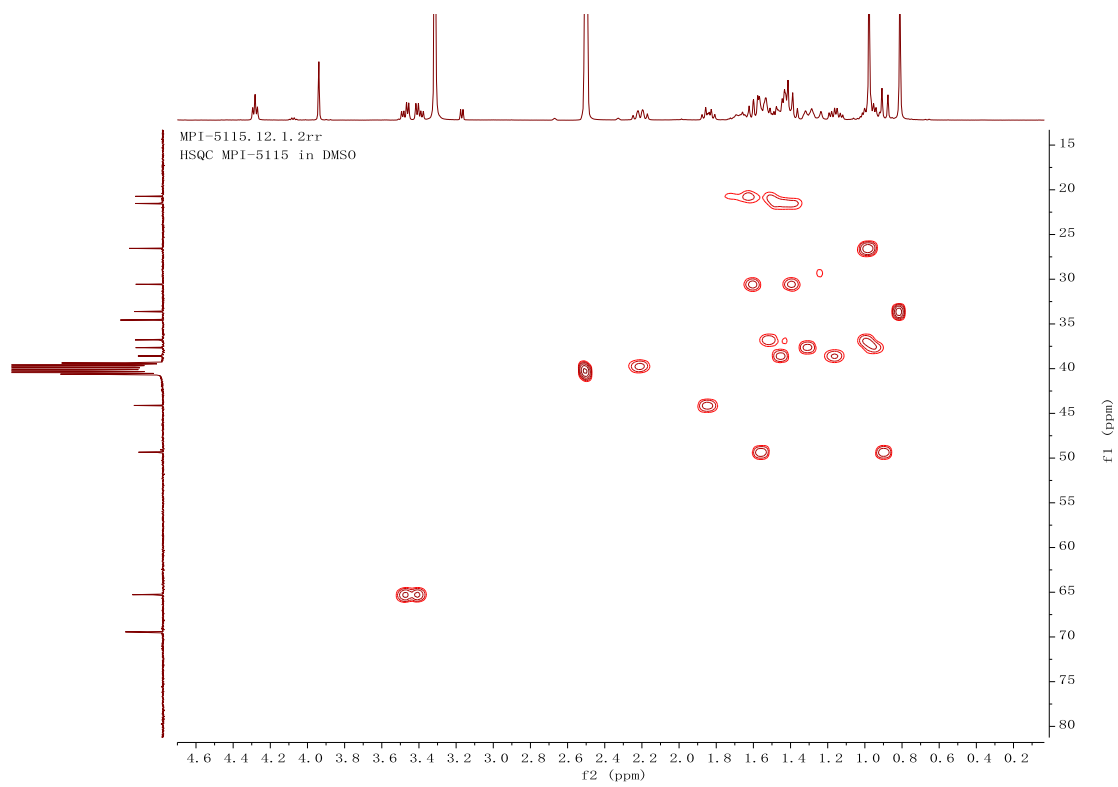

Figure S15. HSQC spectrum of the new compound **2**

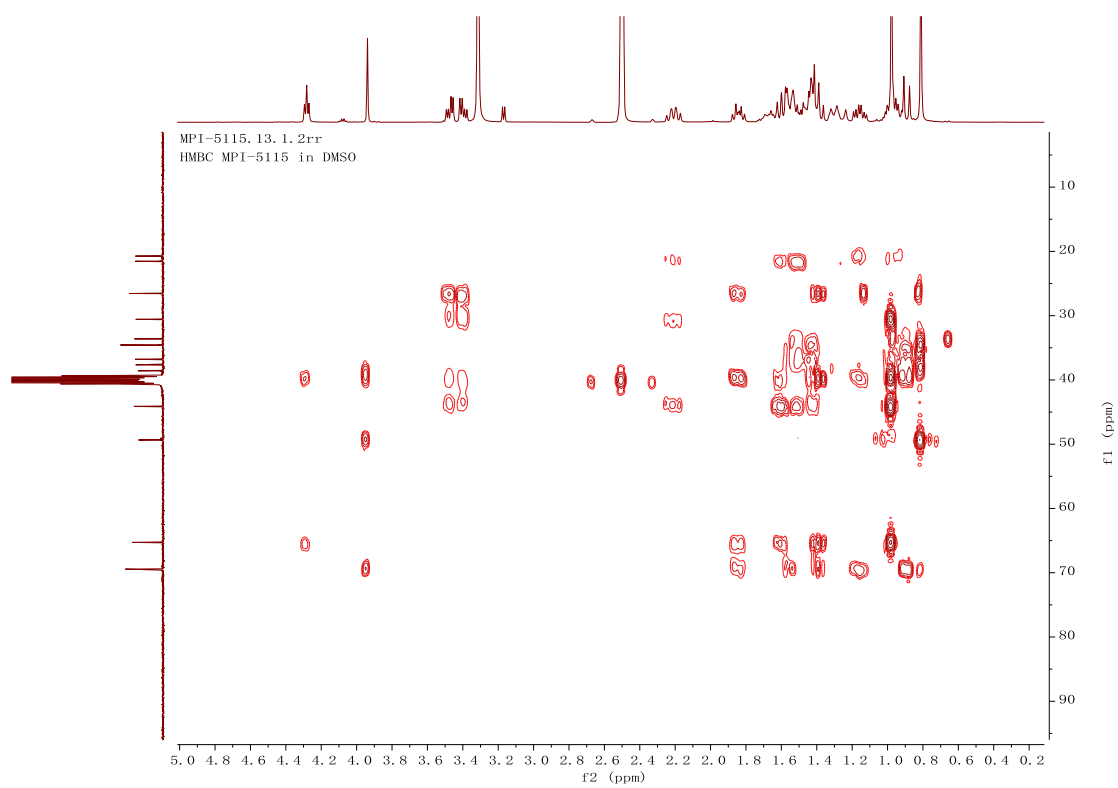

Figure S16. HMBC spectrum of the new compound **2**

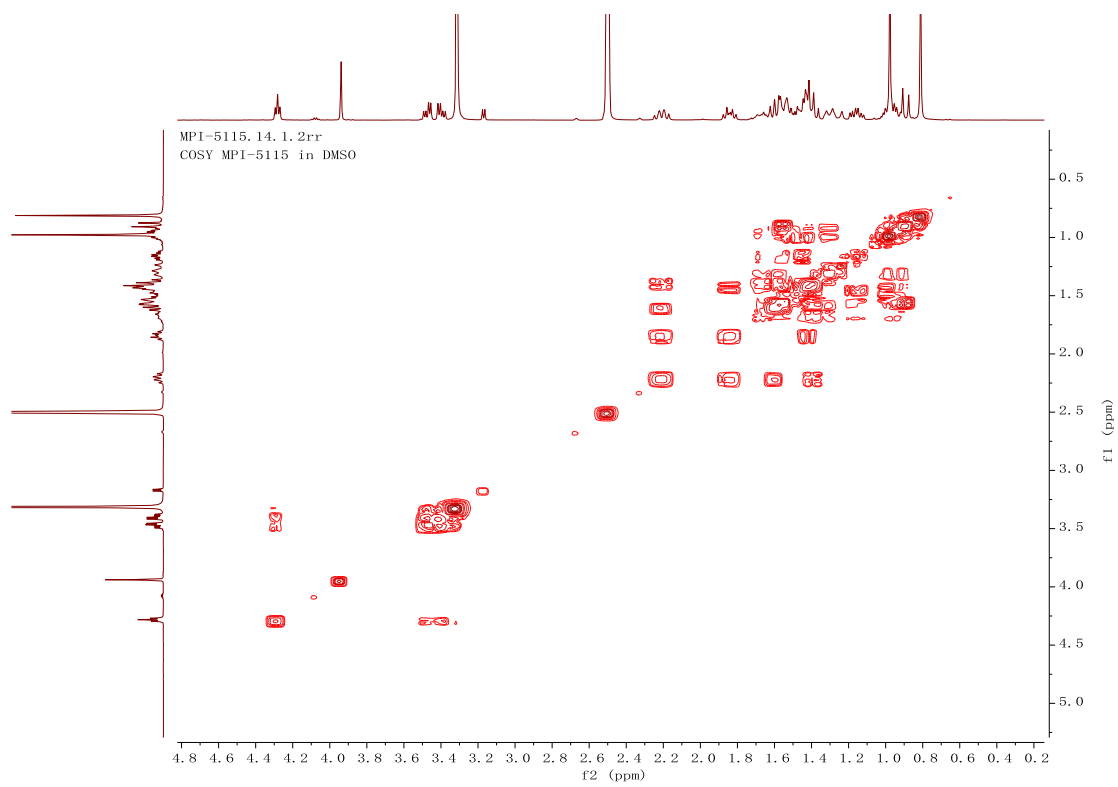

Figure S17. COSY spectrum of the new compound **2**

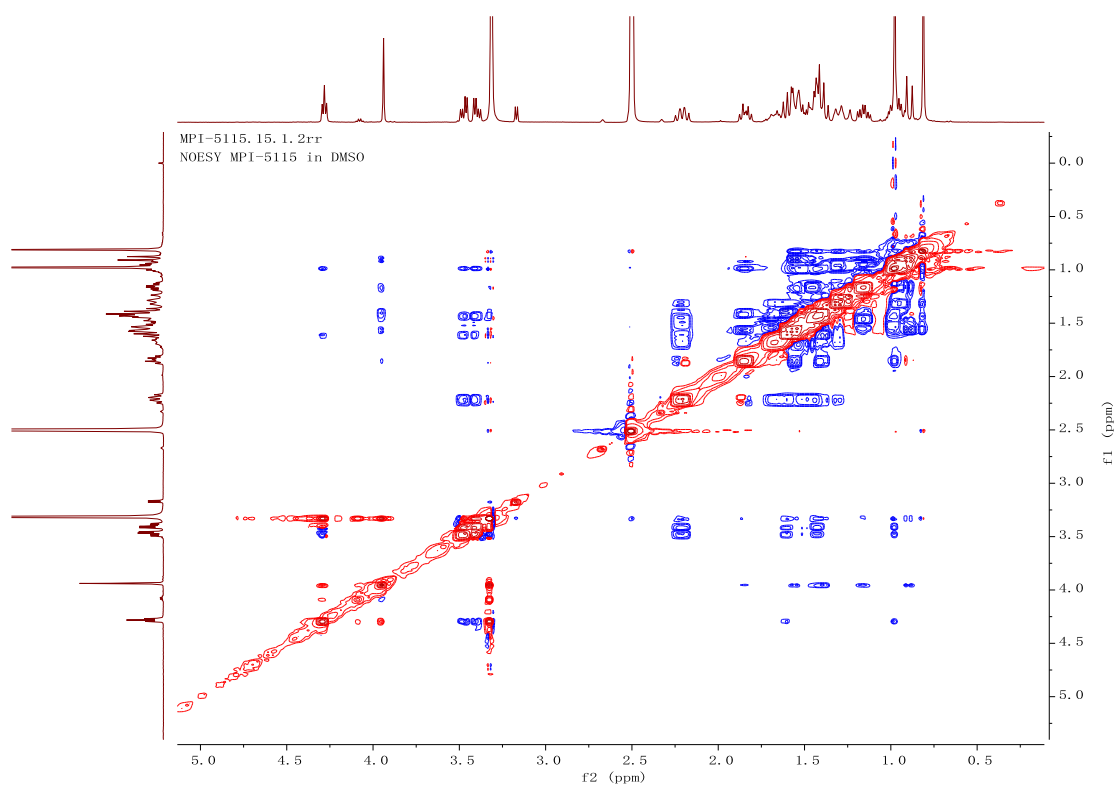

Figure S18. NOESY spectrum of the new compound **2**



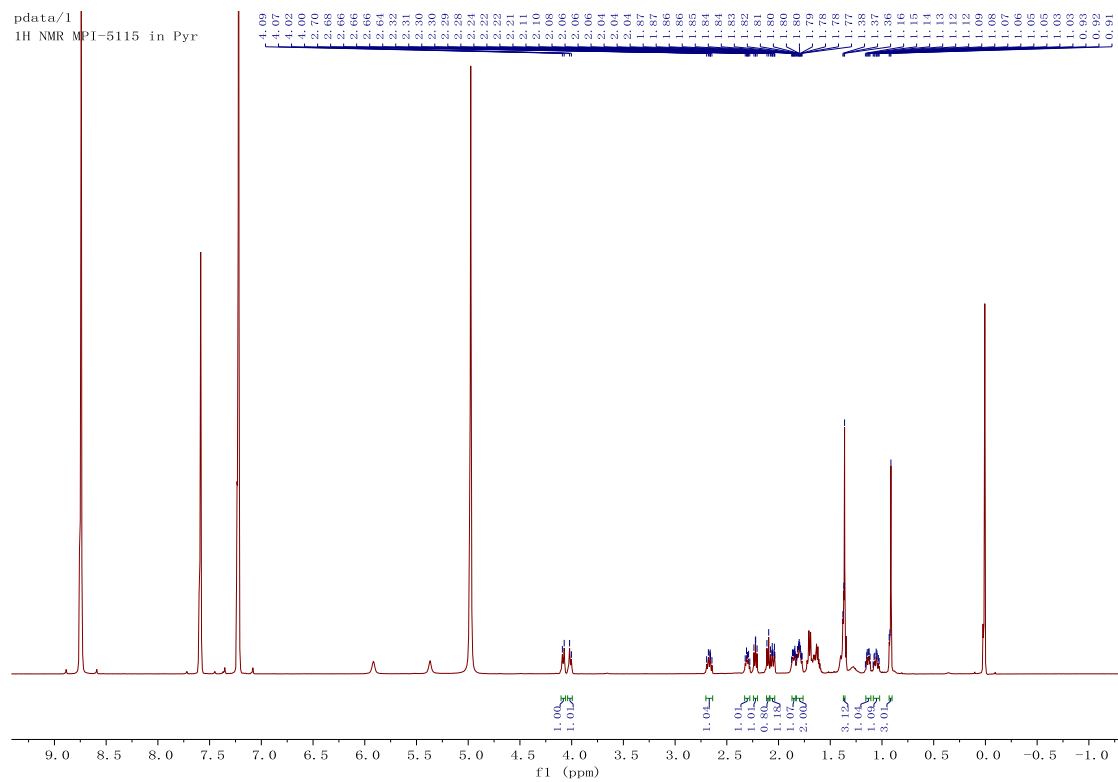

Figure S19.  $^1\text{H}$  NMR (600 MHz, in pyridine- $d_5$ ) spectrum of the new compound **2**

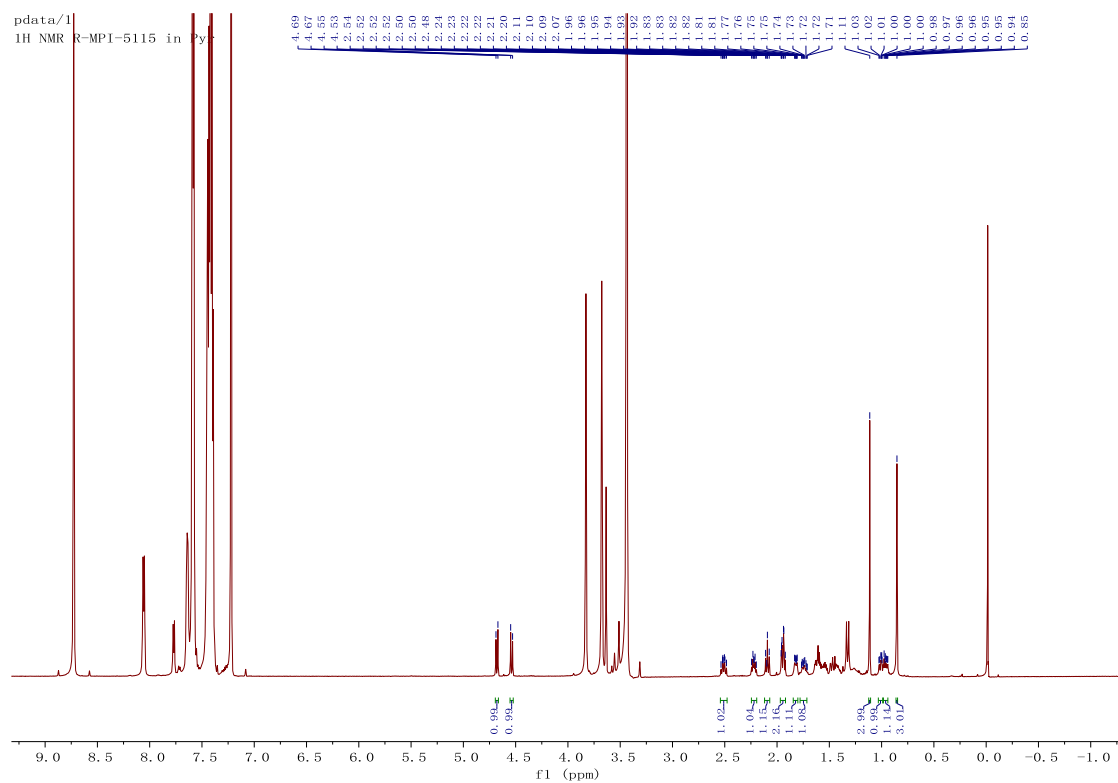

Figure S20.  $^1\text{H}$  NMR spectrum of (*S*)-MTPA ester (**2a**) in pyridine- $d_5$

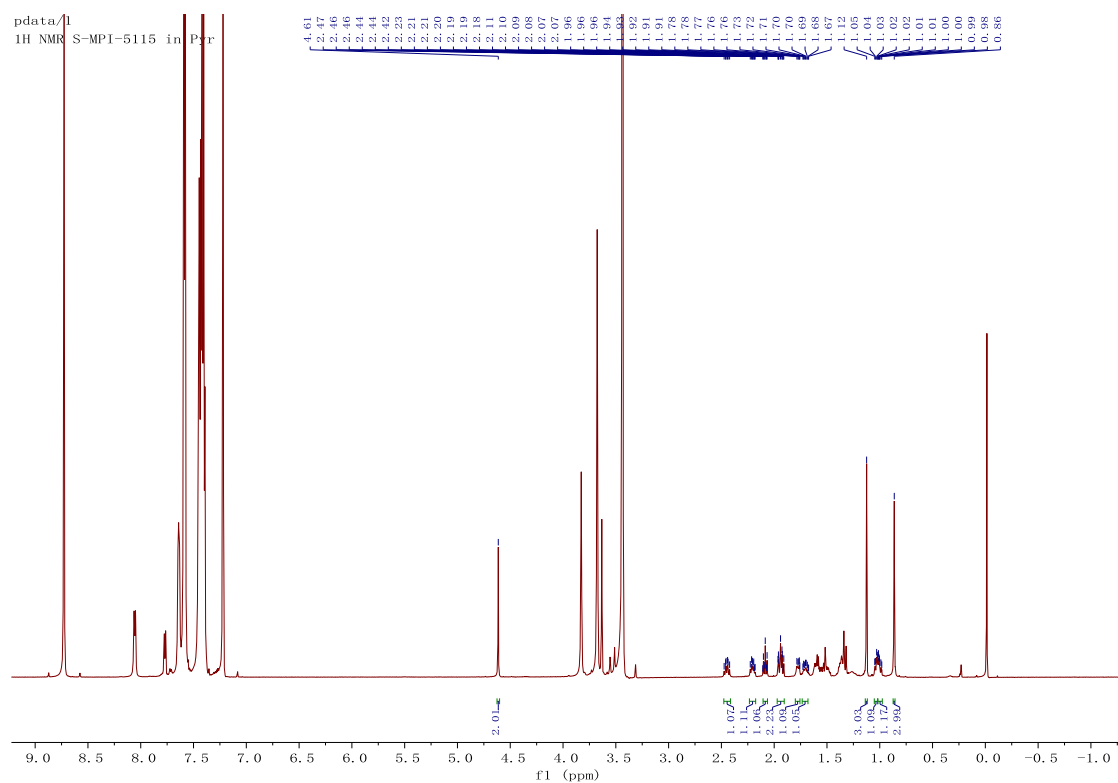

Figure S21.  $^1\text{H}$  NMR spectrum of (*R*)-MTPA ester (**2b**) in pyridine- $d_5$

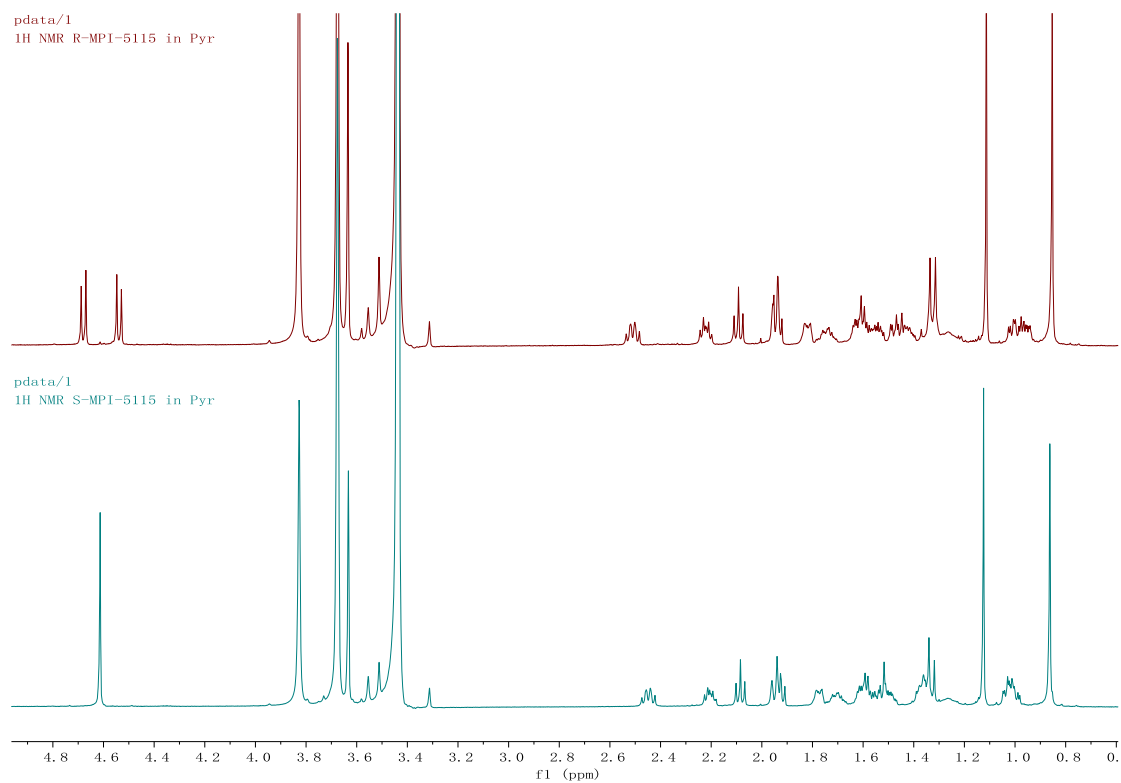

Figure S22. Comparison of  $^1\text{H}$  NMR spectra of (*S*)-MTPA ester (**2a**) and (*R*)-MTPA ester (**2b**) in pyridine- $d_5$

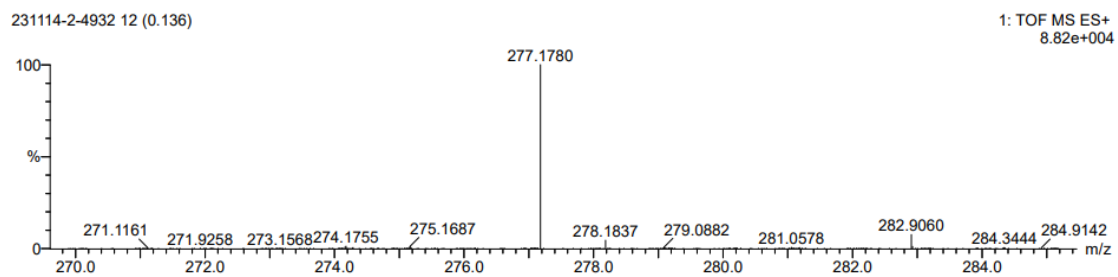

Figure S23. HRESI-MS spectrum of the new compound **3**

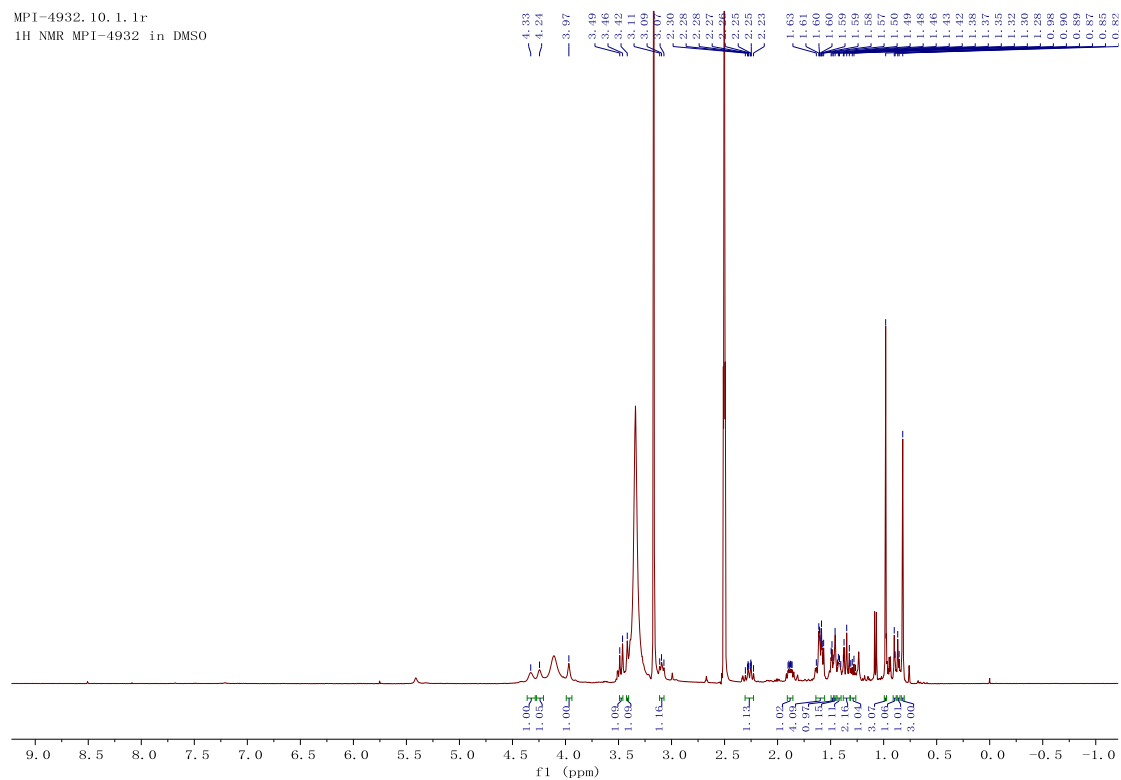

Figure S24.  $^1\text{H}$  NMR (600 MHz,  $\text{DMSO-}d_6$ ) spectrum of the new compound **3**

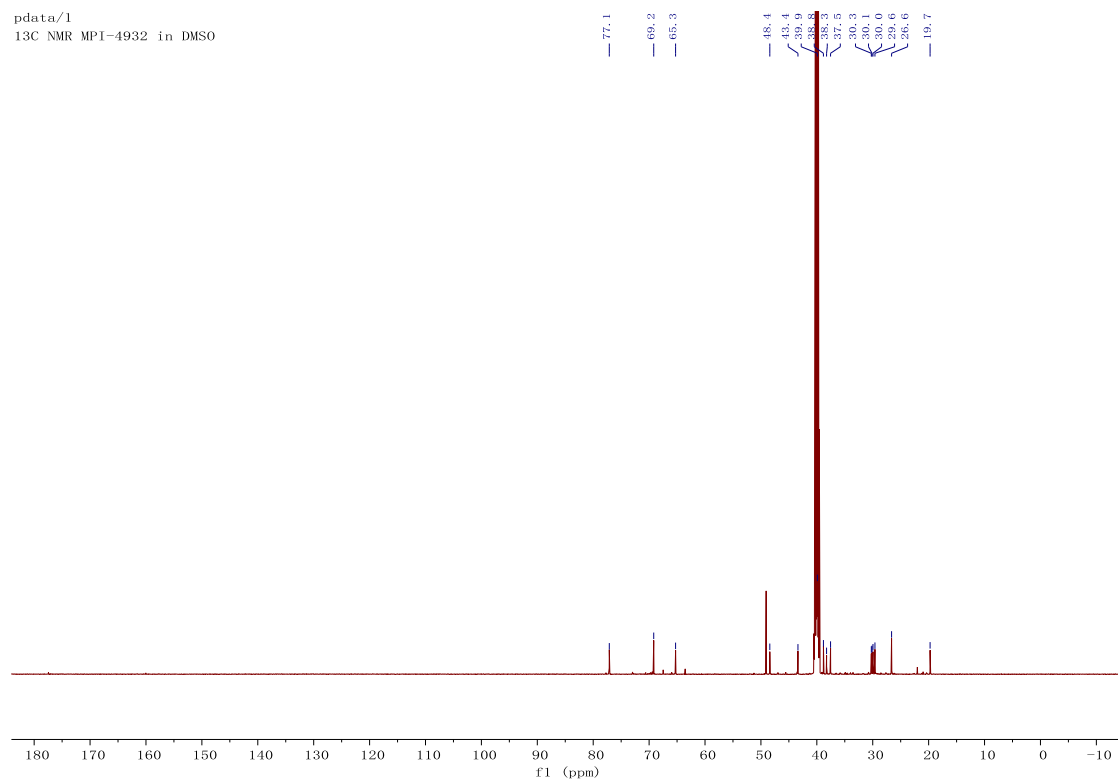

Figure S25. <sup>13</sup>C NMR (150 MHz, DMSO-*d*<sub>6</sub>) spectrum of the new compound **3**

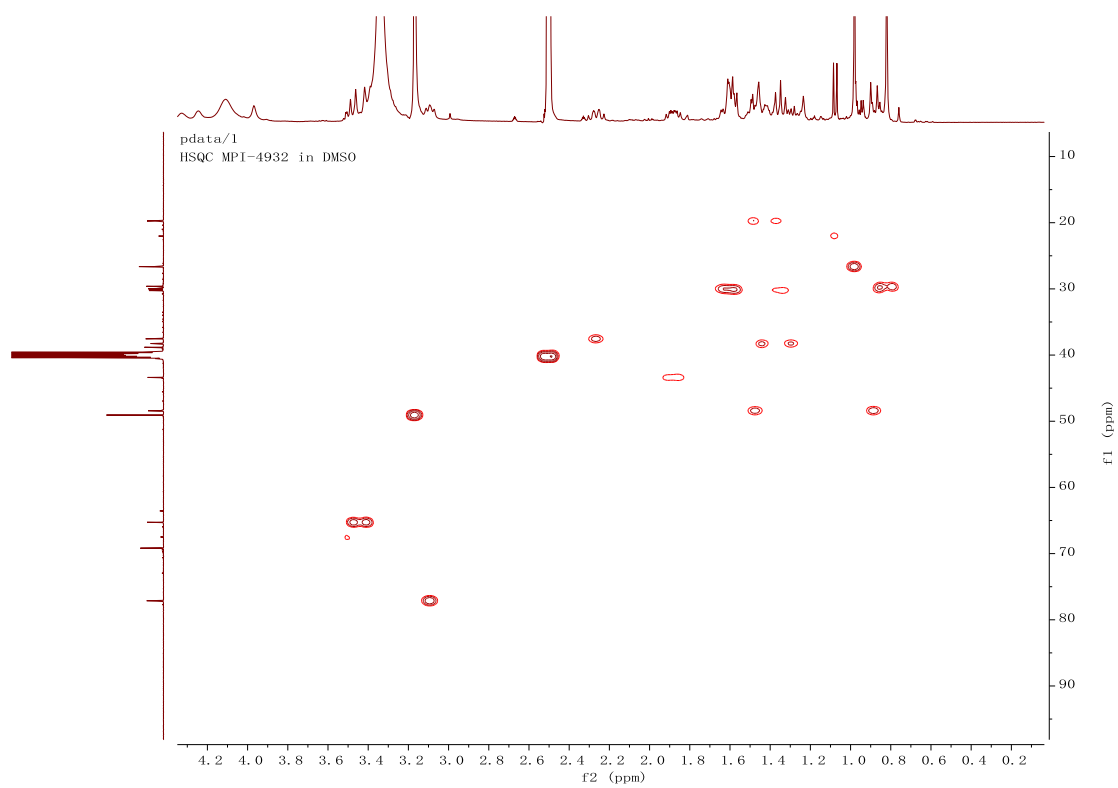

Figure S26. HSQC spectrum of the new compound **3**

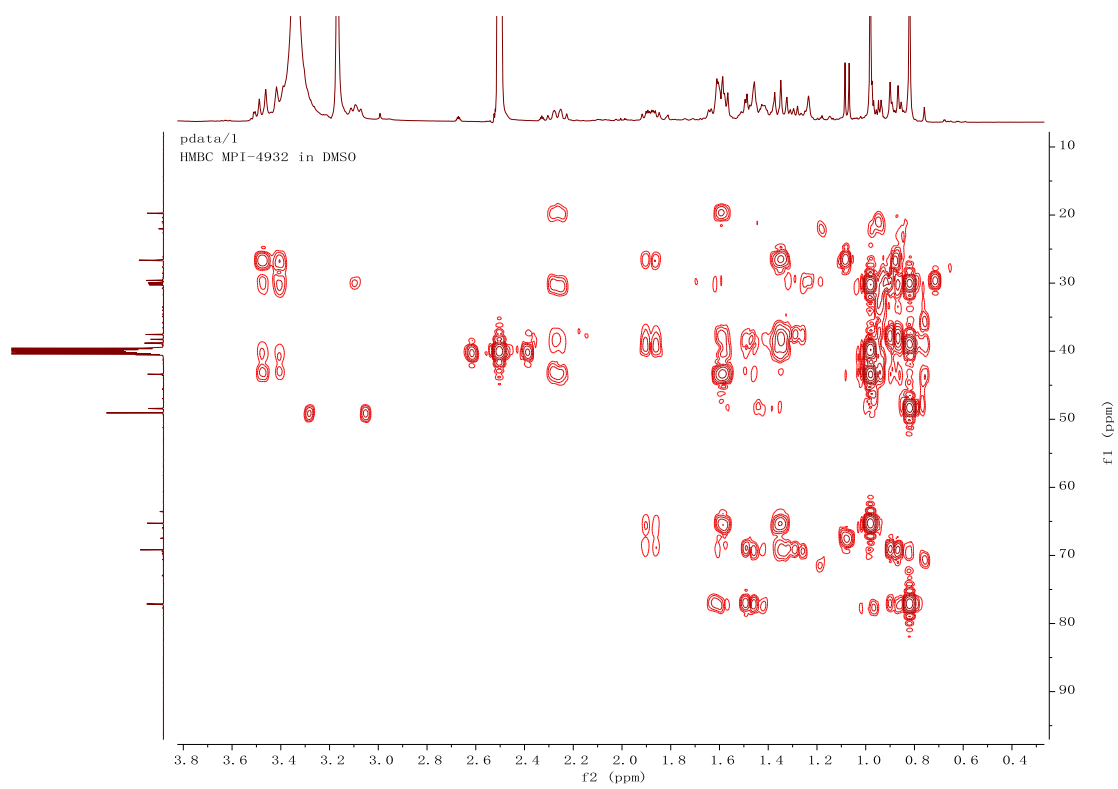

Figure S27. HMBC spectrum of the new compound **3**

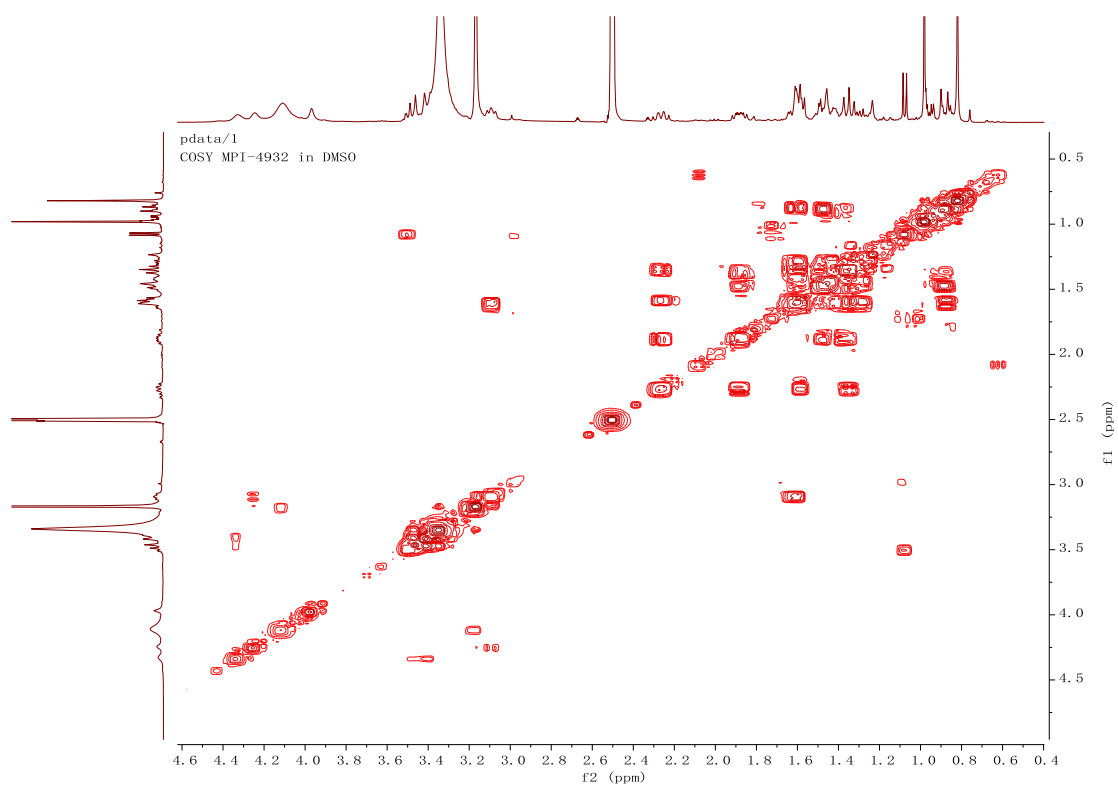

Figure S28. COSY spectrum of the new compound **3**

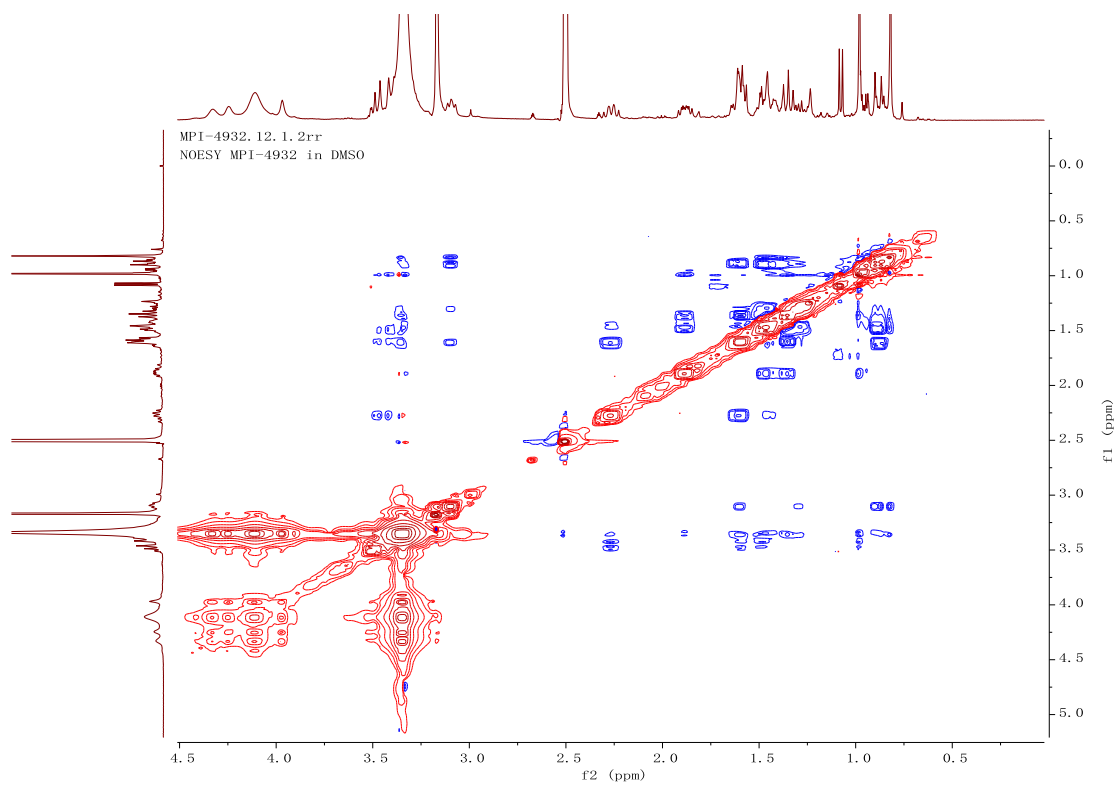

Figure S29. NOESY spectrum of the new compound **3**

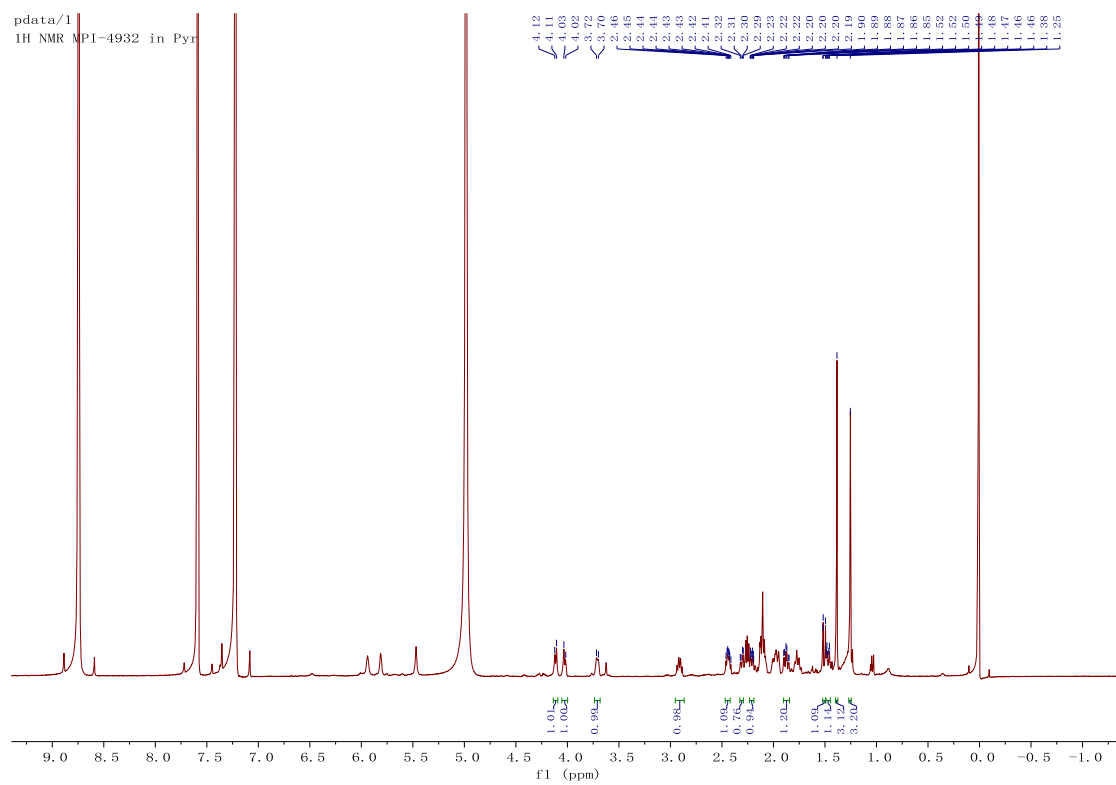

Figure S30.  $^1\text{H}$  NMR (600 MHz, in pyridine- $d_5$ ) spectrum of the new compound **3**

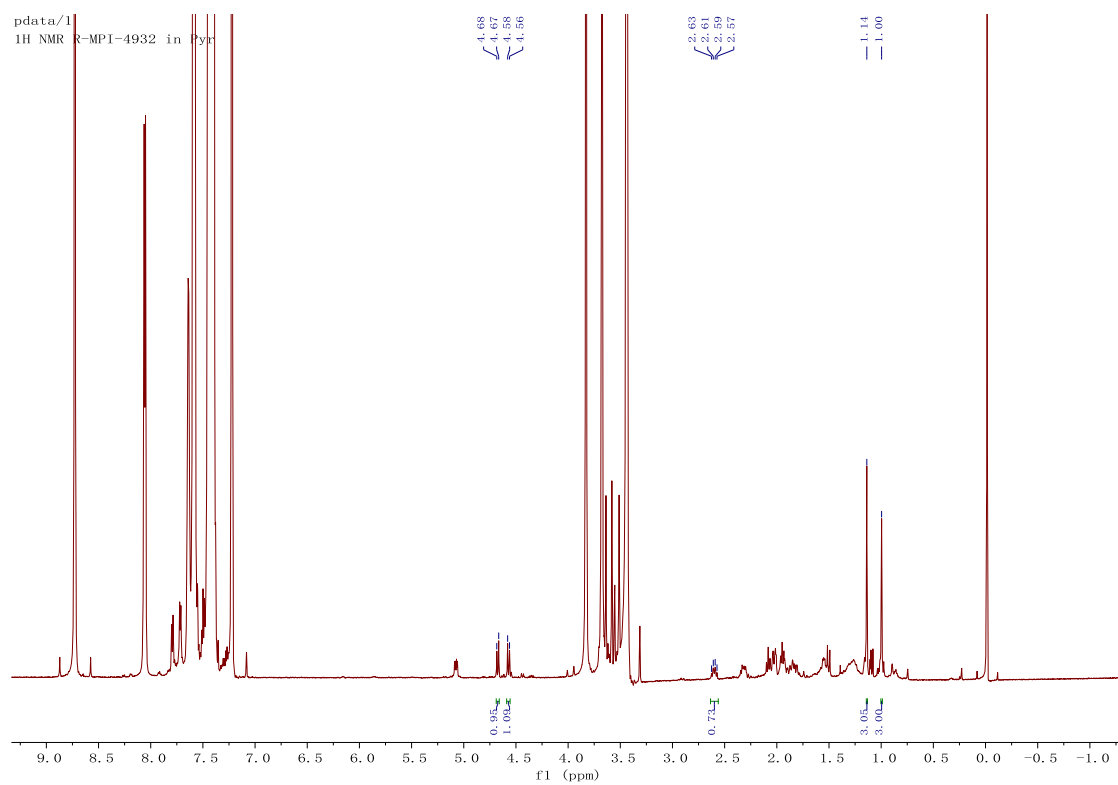

Figure S31.  $^1\text{H}$  NMR spectrum of (*S*)-MTPA ester (**3a**) in pyridine- $d_5$

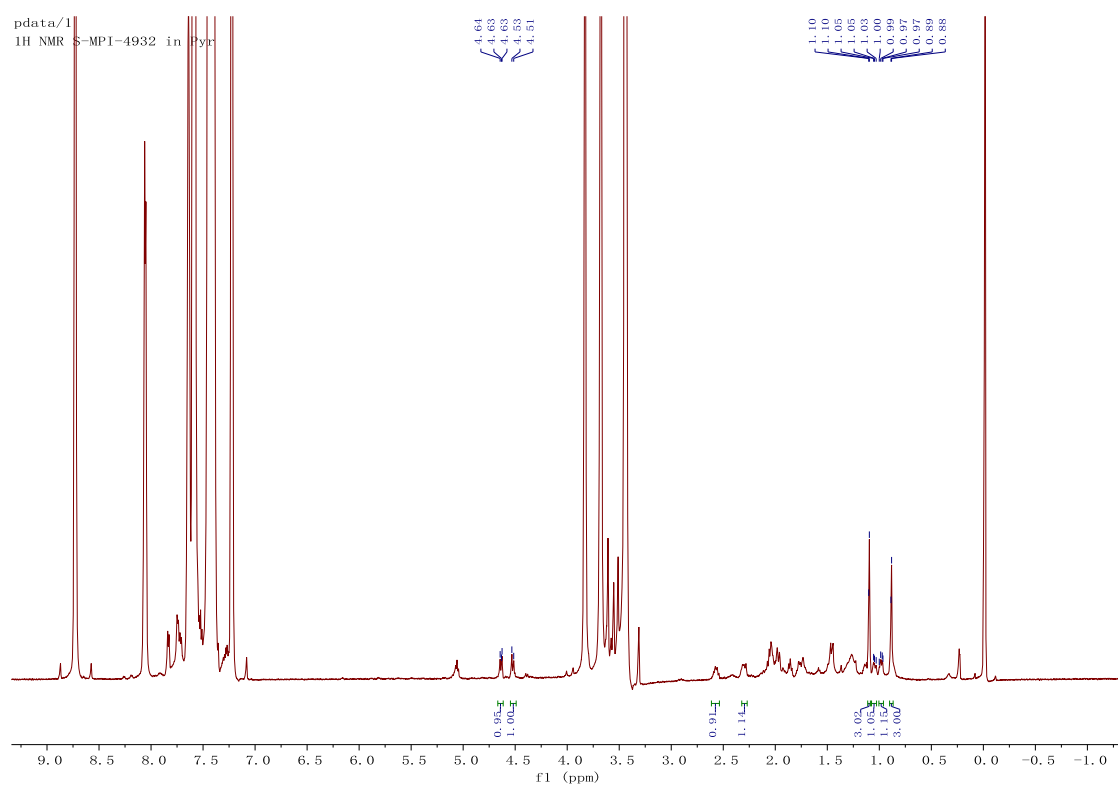

Figure S32.  $^1\text{H}$  NMR spectrum of (*R*)-MTPA ester (**3b**) in pyridine- $d_5$

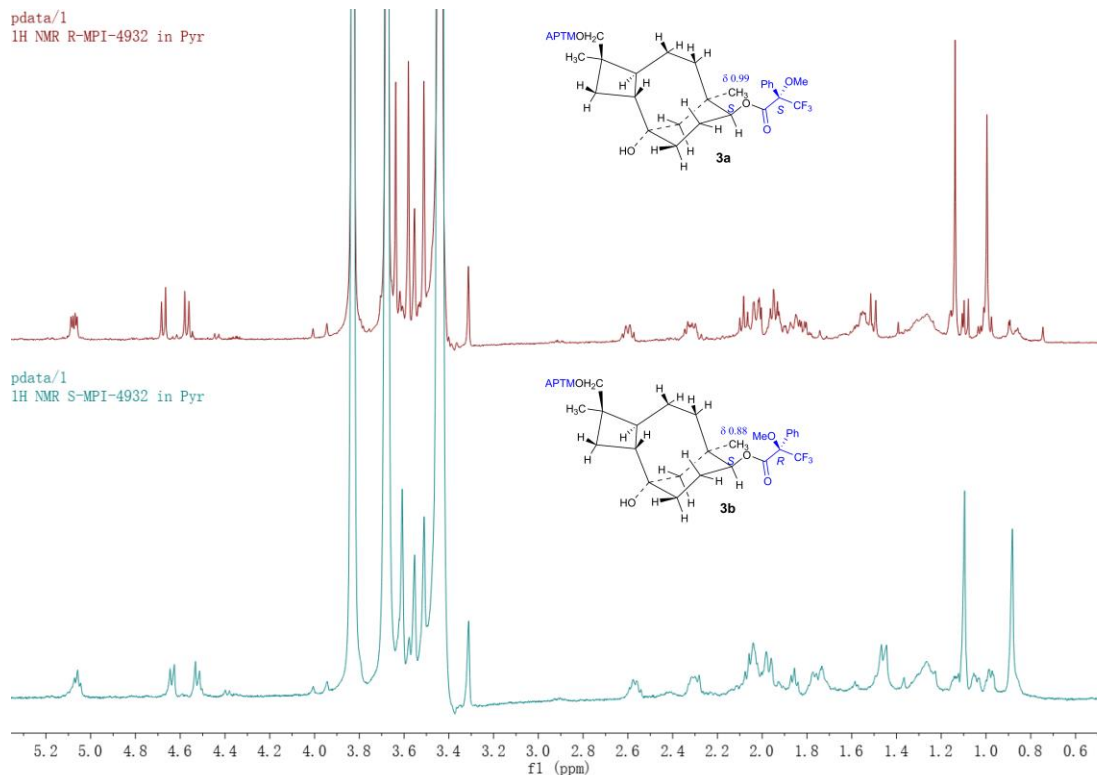

Figure S33. Comparison of  $^1\text{H}$  NMR spectra of (*S*)-MTPA ester (**3a**) and (*R*)-MTPA ester (**3b**) in pyridine- $d_5$

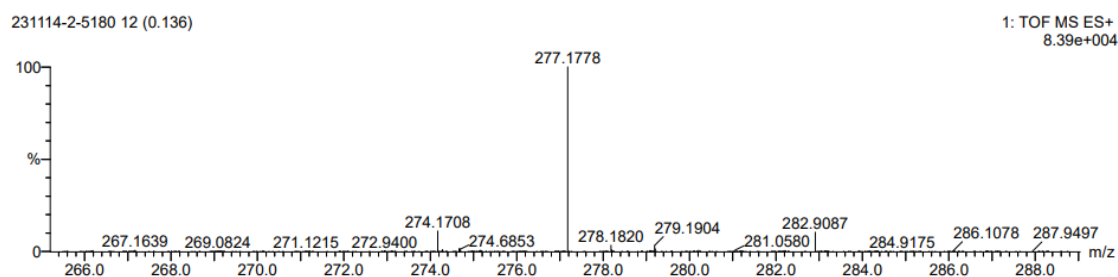

Figure S34. HRESI-MS spectrum of the new compound **4**



MPI-5108.10.1.1r  
1H NMR MPI-5108 in DMSO

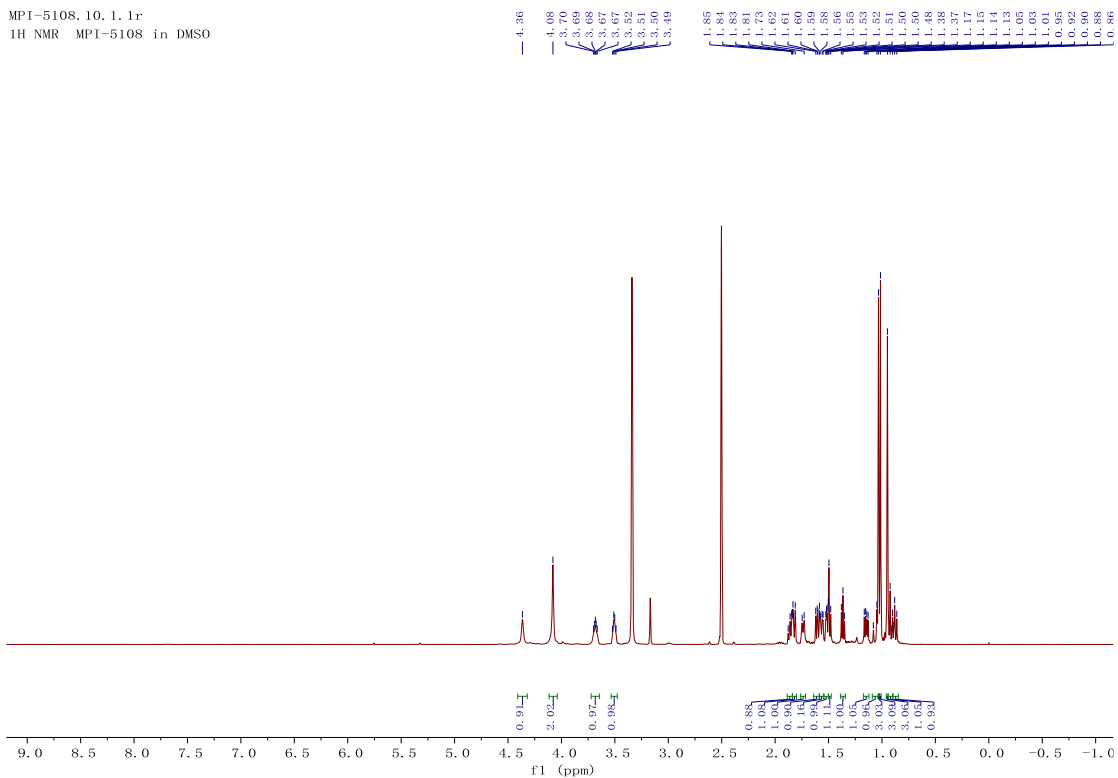

Figure S35.  $^1\text{H}$  NMR (600 MHz,  $\text{DMSO-}d_6$ ) spectrum of the new compound **4**

pdata/1  
13C NMR MPI-5108 in DMSO

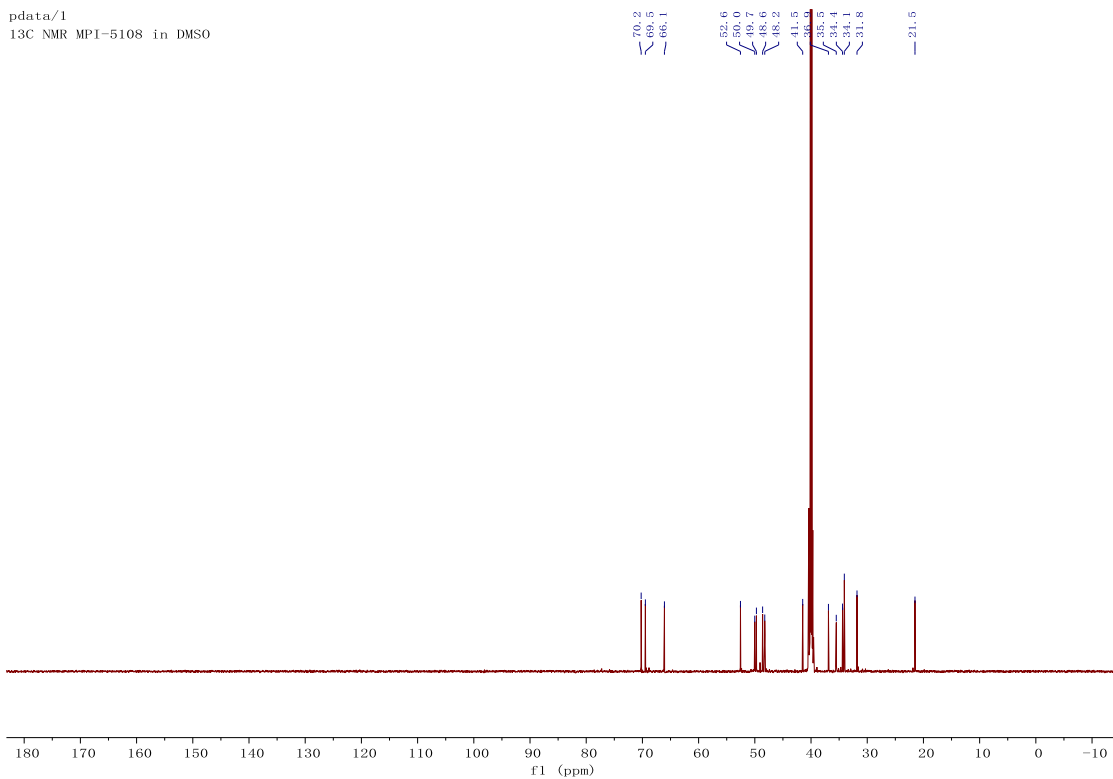

Figure S36.  $^{13}\text{C}$  NMR (150 MHz,  $\text{DMSO-}d_6$ ) spectrum of the new compound **4**

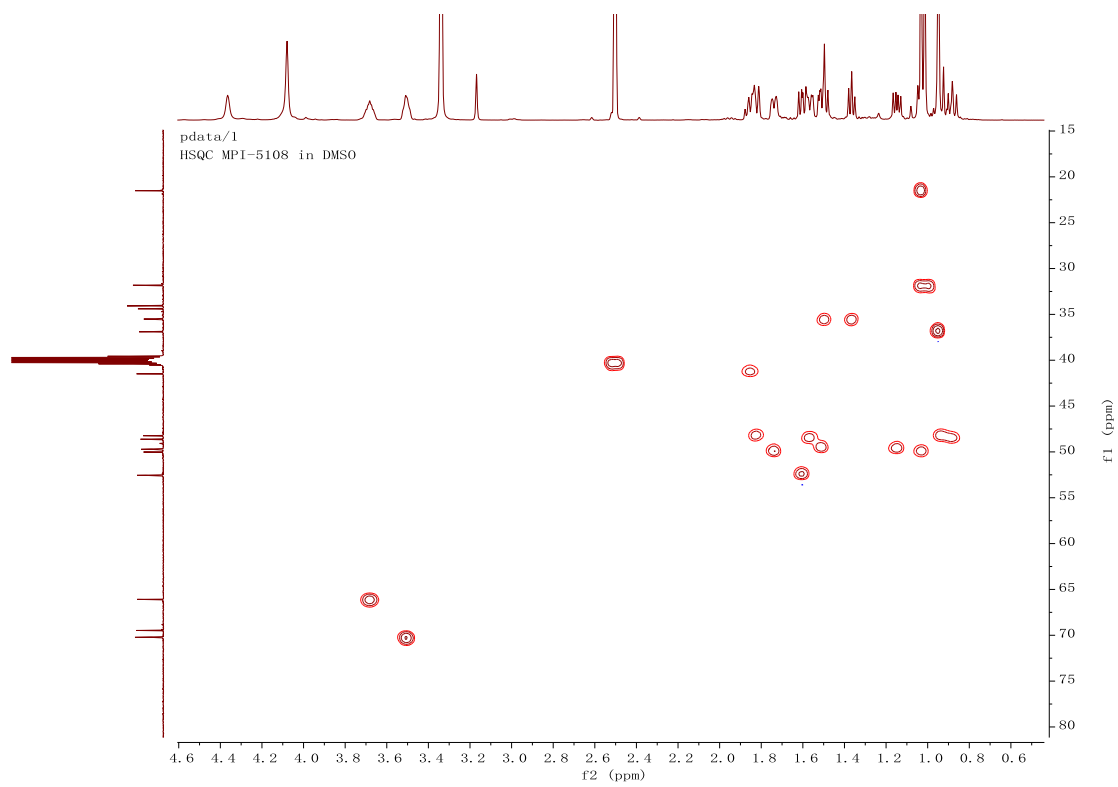

Figure S37. HSQC spectrum of the new compound **4**

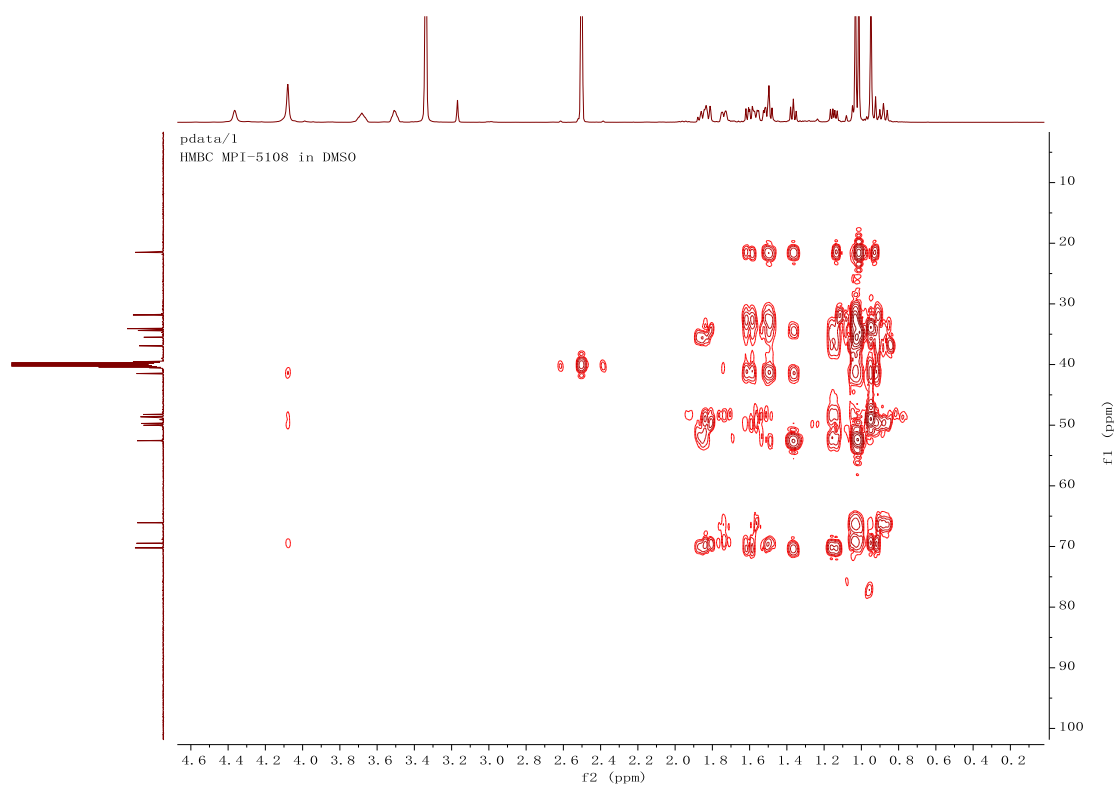

Figure S38. HMBC spectrum of the new compound **4**

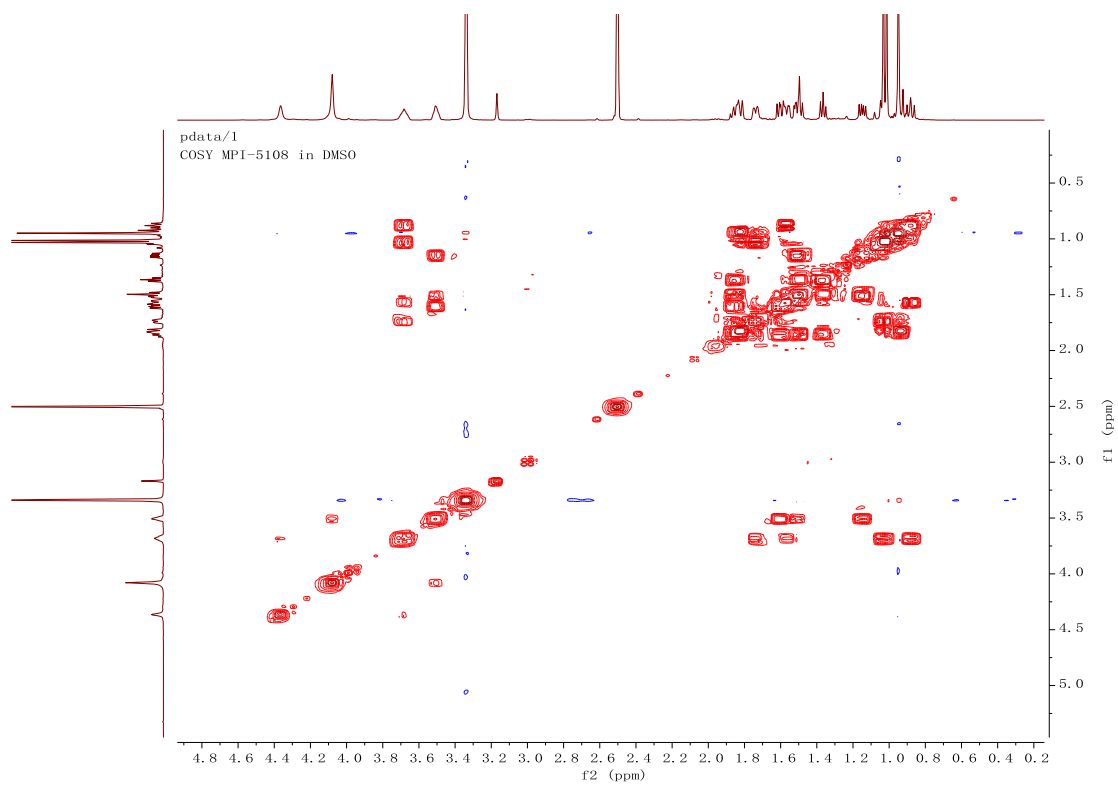

Figure S39. COSY spectrum of the new compound **4**

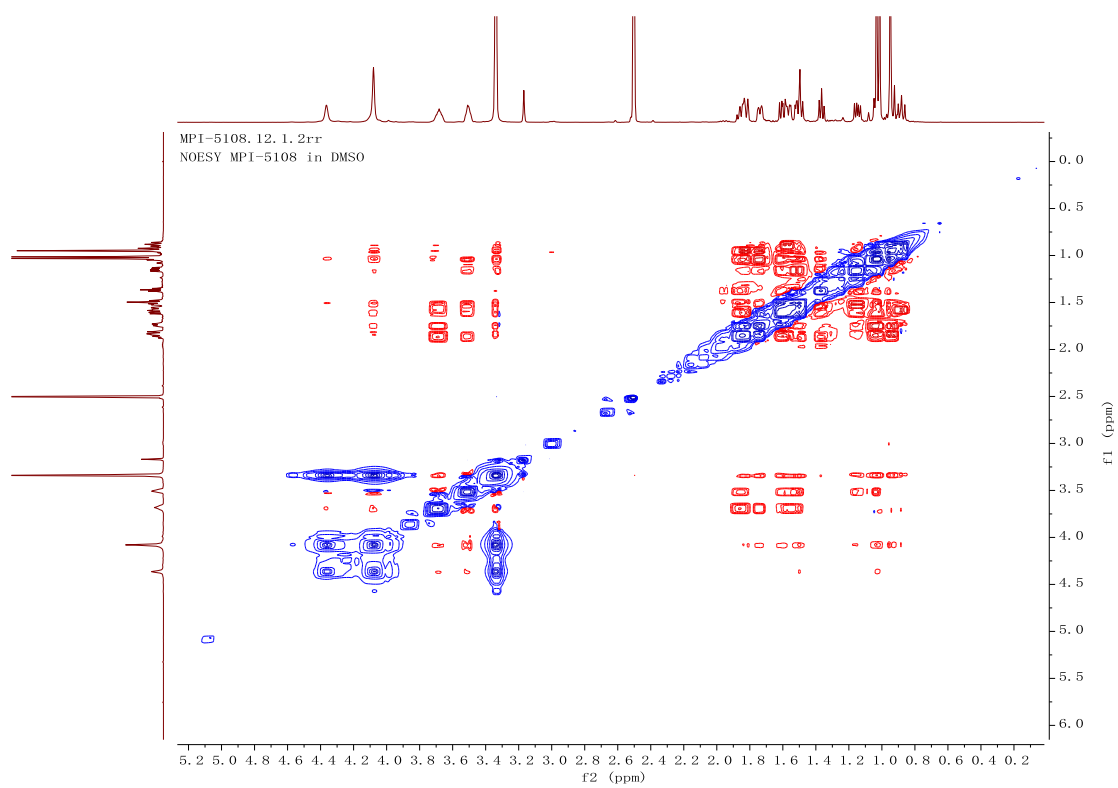

Figure S40. NOESY spectrum of the new compound **4**

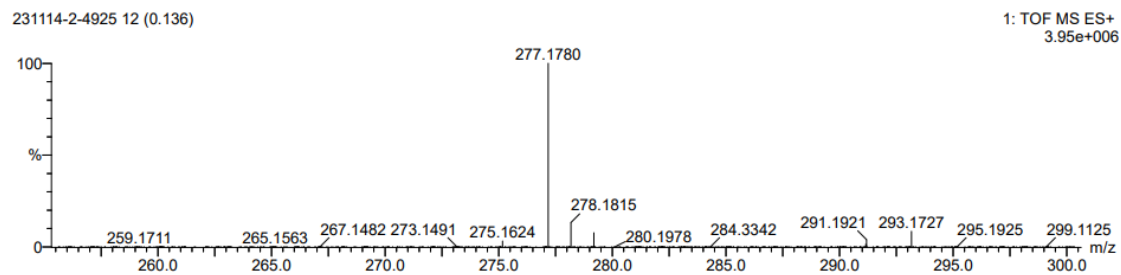

Figure S41. HRESI-MS spectrum of the new compound **13**

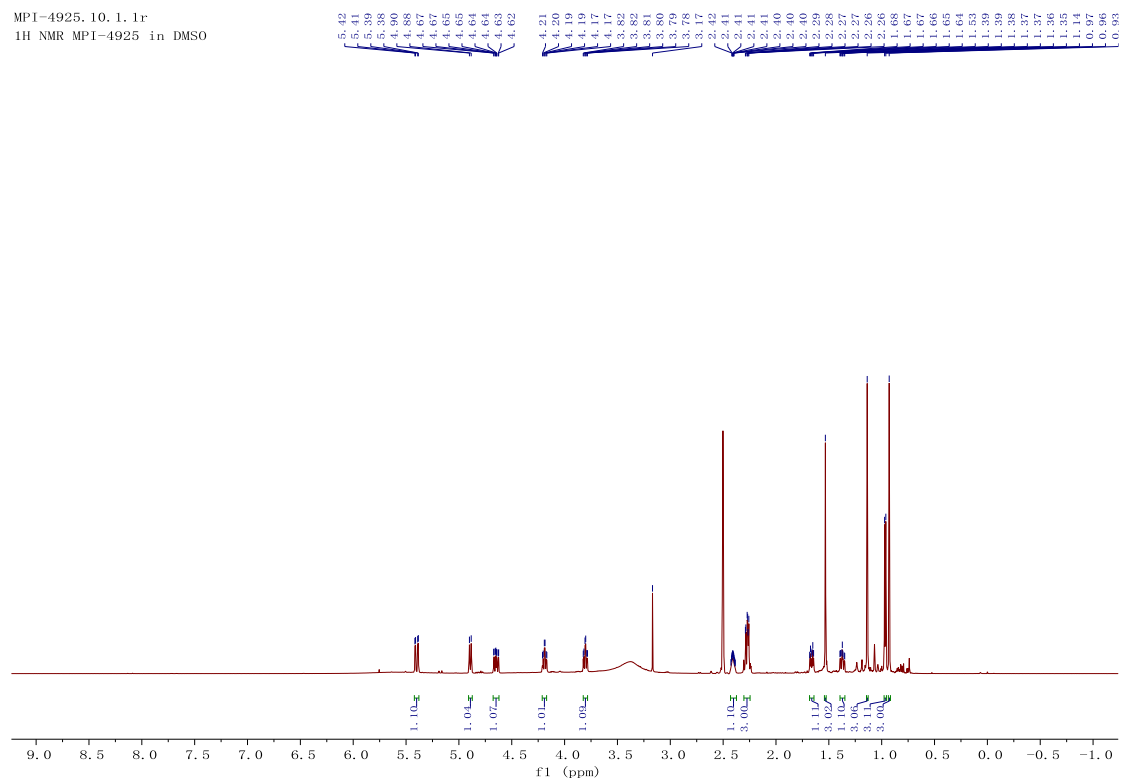

Figure S42.  $^1\text{H}$  NMR (600 MHz,  $\text{DMSO}-d_6$ ) spectrum of the new compound **13**

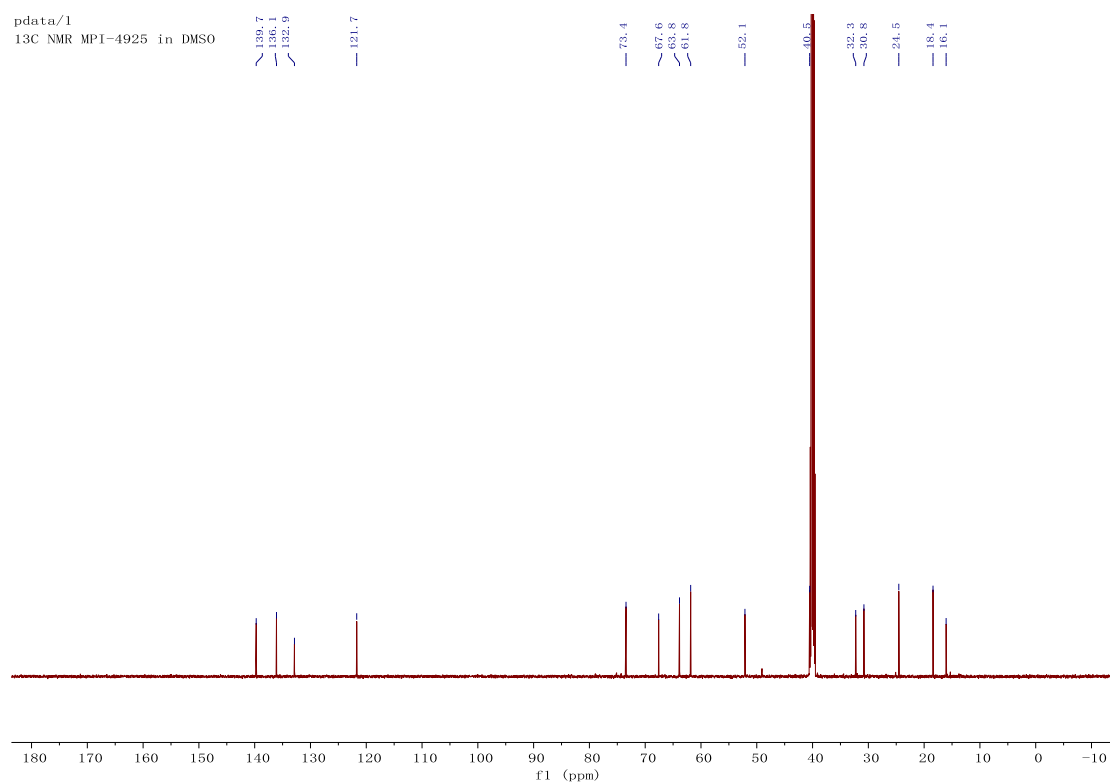

Figure S43. <sup>13</sup>C NMR (150 MHz, DMSO-*d*<sub>6</sub>) spectrum of the new compound **13**

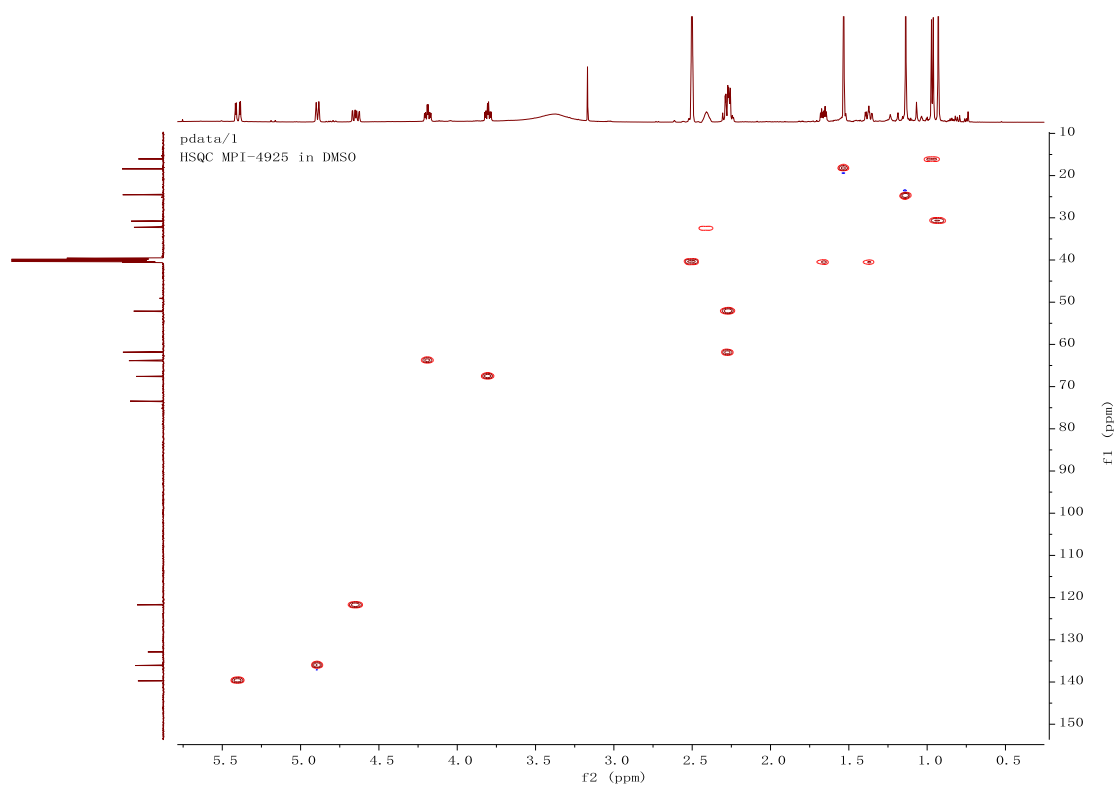

Figure S44. HSQC spectrum of the new compound **13**

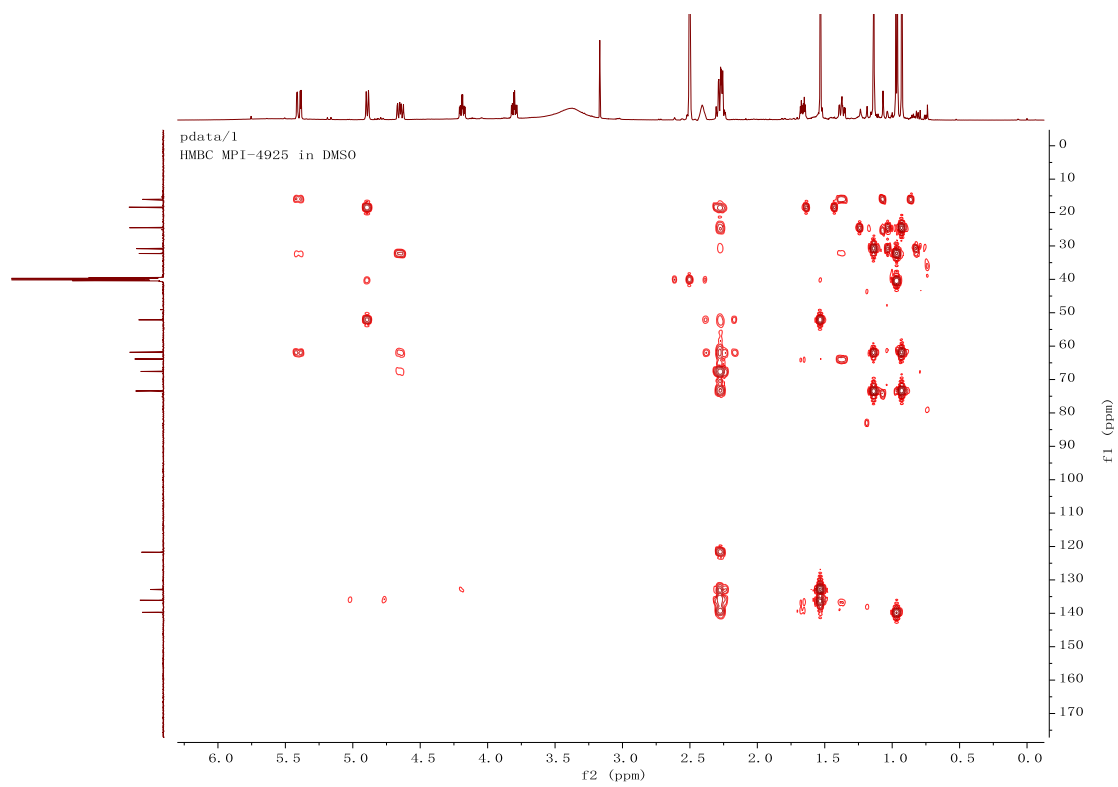

Figure S45. HMBC spectrum of the new compound **13**

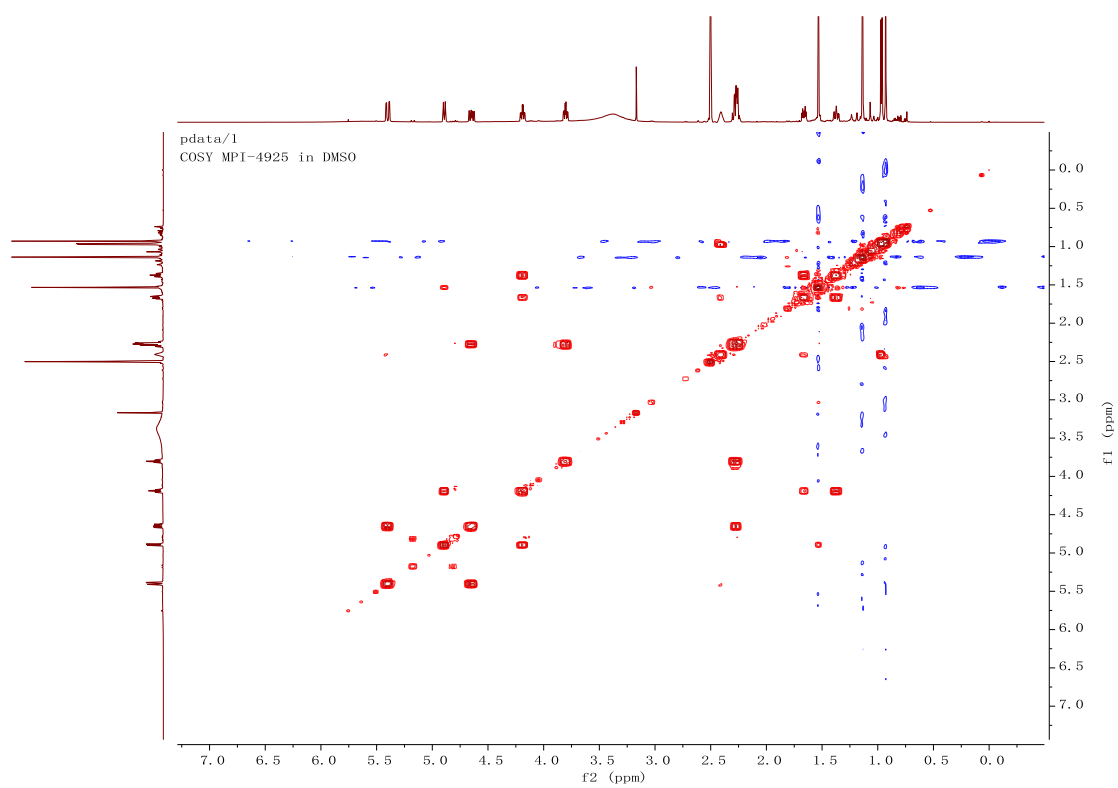

Figure S46. COSY spectrum of the new compound **13**

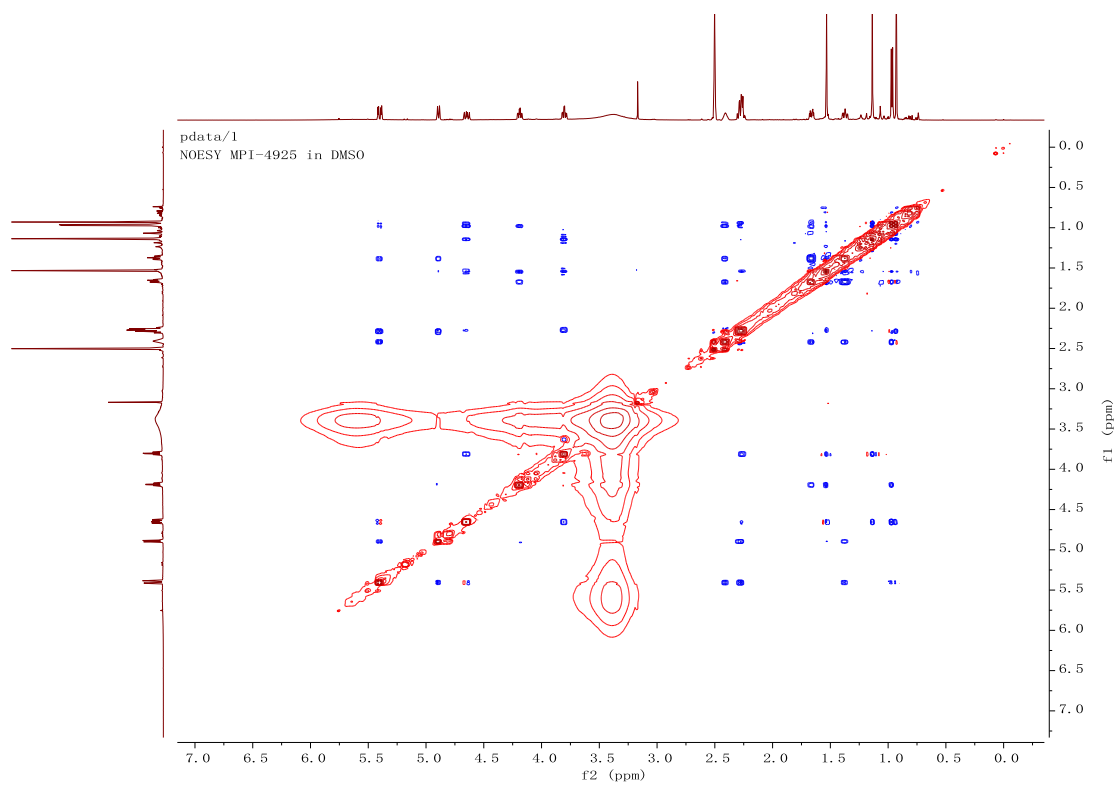

Figure S47. NOESY spectrum of the new compound **13**

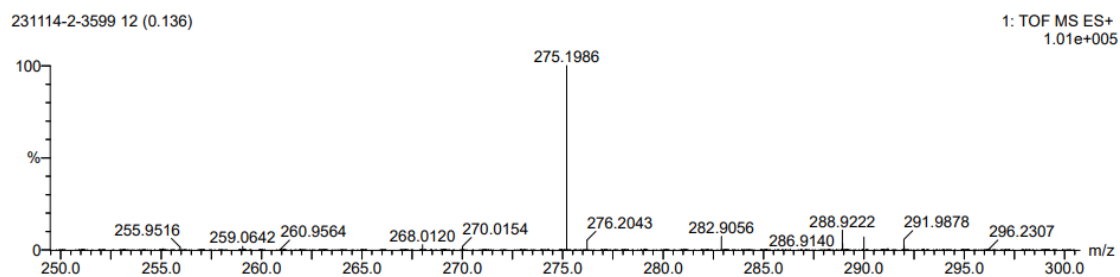

Figure S48. HRESI-MS spectrum of the new compound **14**

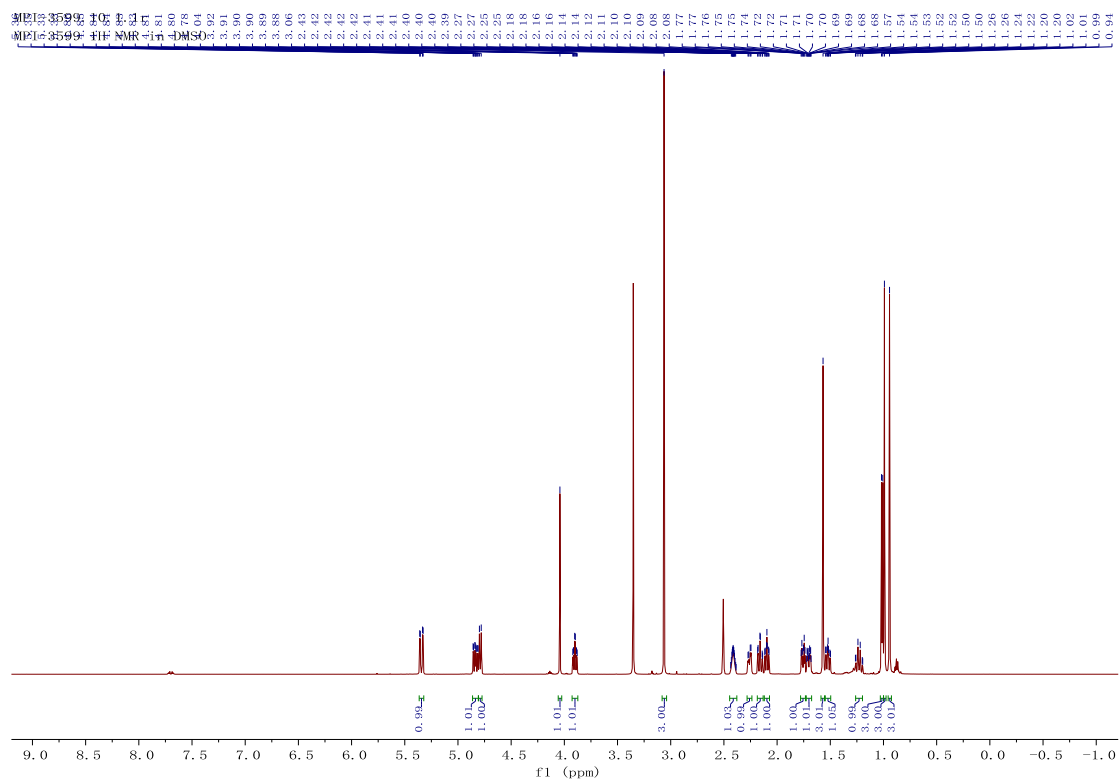

Figure S49.  $^1\text{H}$  NMR (600 MHz,  $\text{DMSO}-d_6$ ) spectrum of the new compound **14**

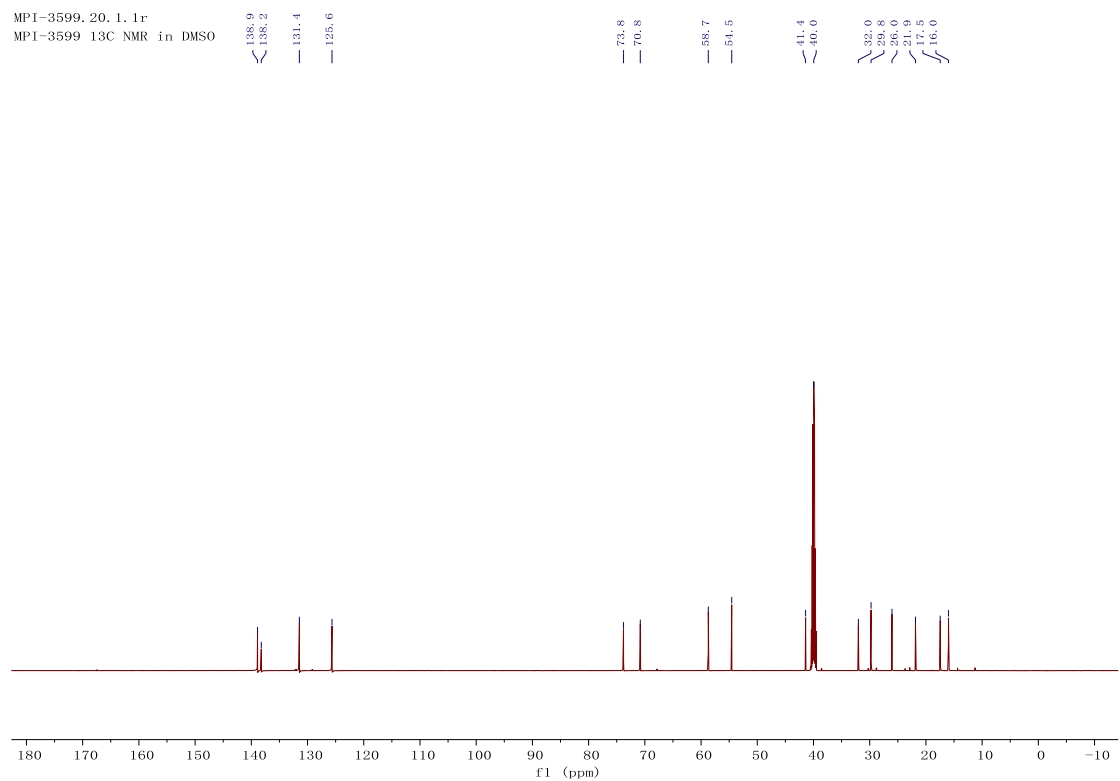

Figure S50.  $^{13}\text{C}$  NMR (150 MHz,  $\text{DMSO}-d_6$ ) spectrum of the new compound **14**



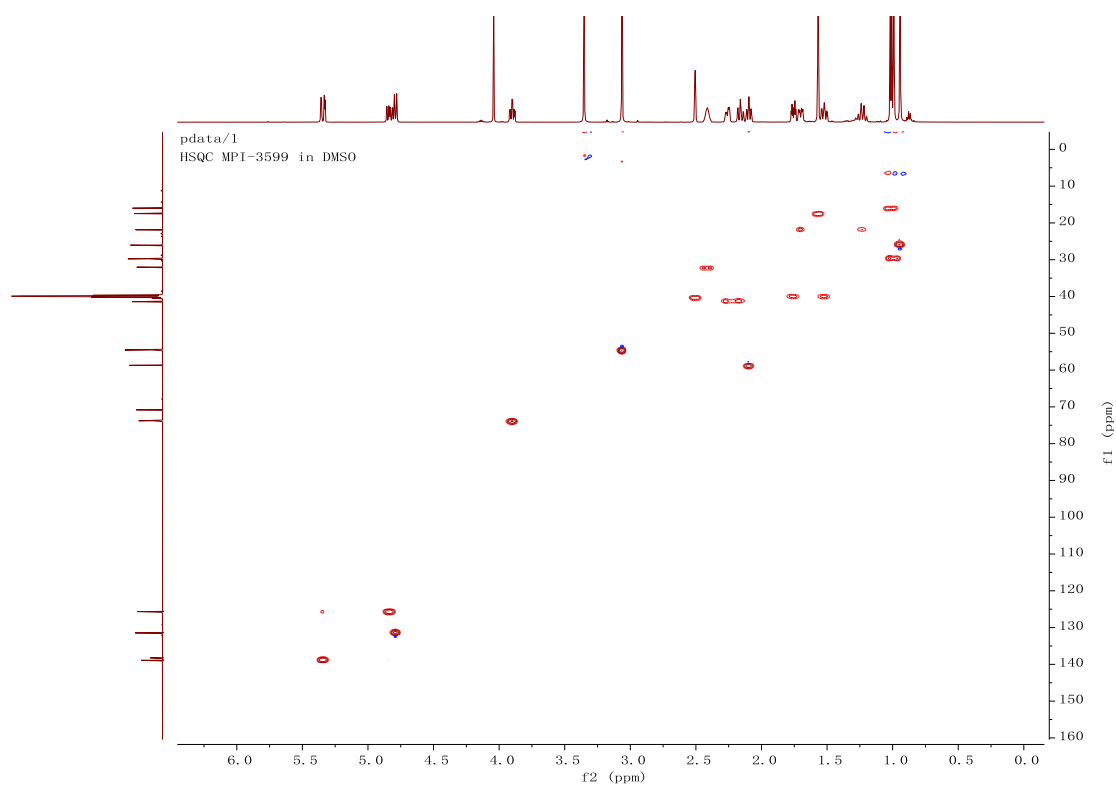

Figure S51. HSQC spectrum of the new compound **14**

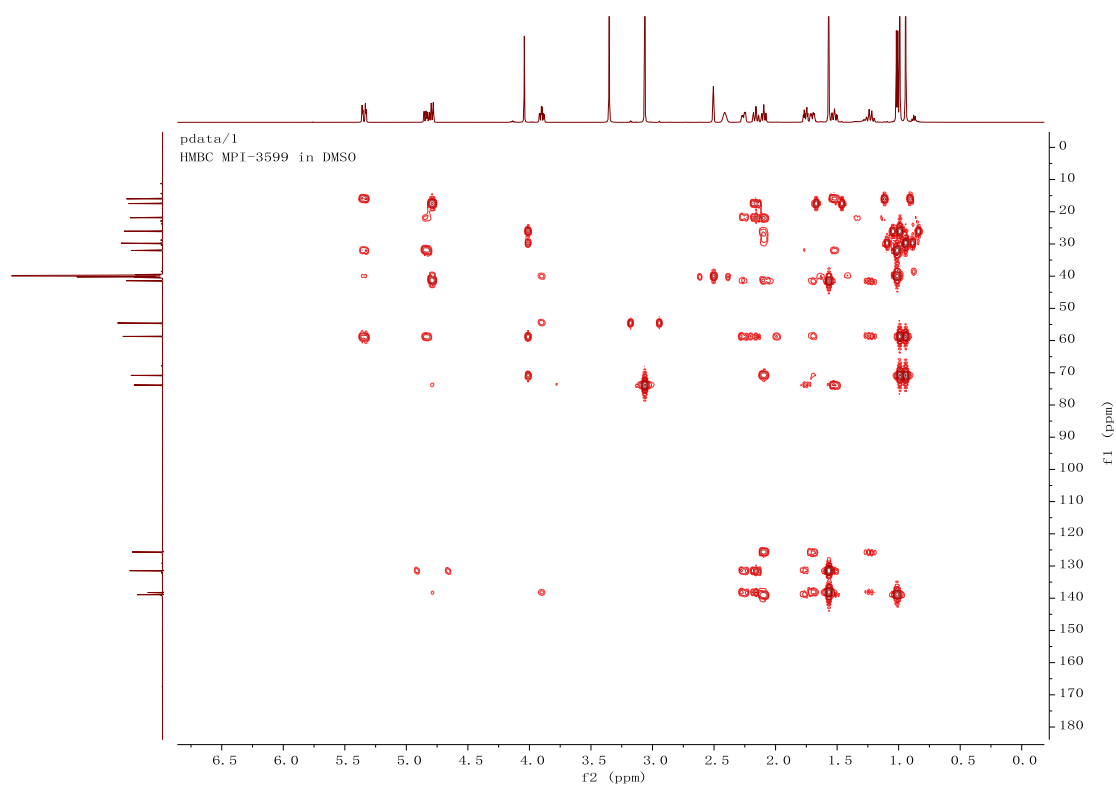

Figure S52. HMBC spectrum of the new compound **14**

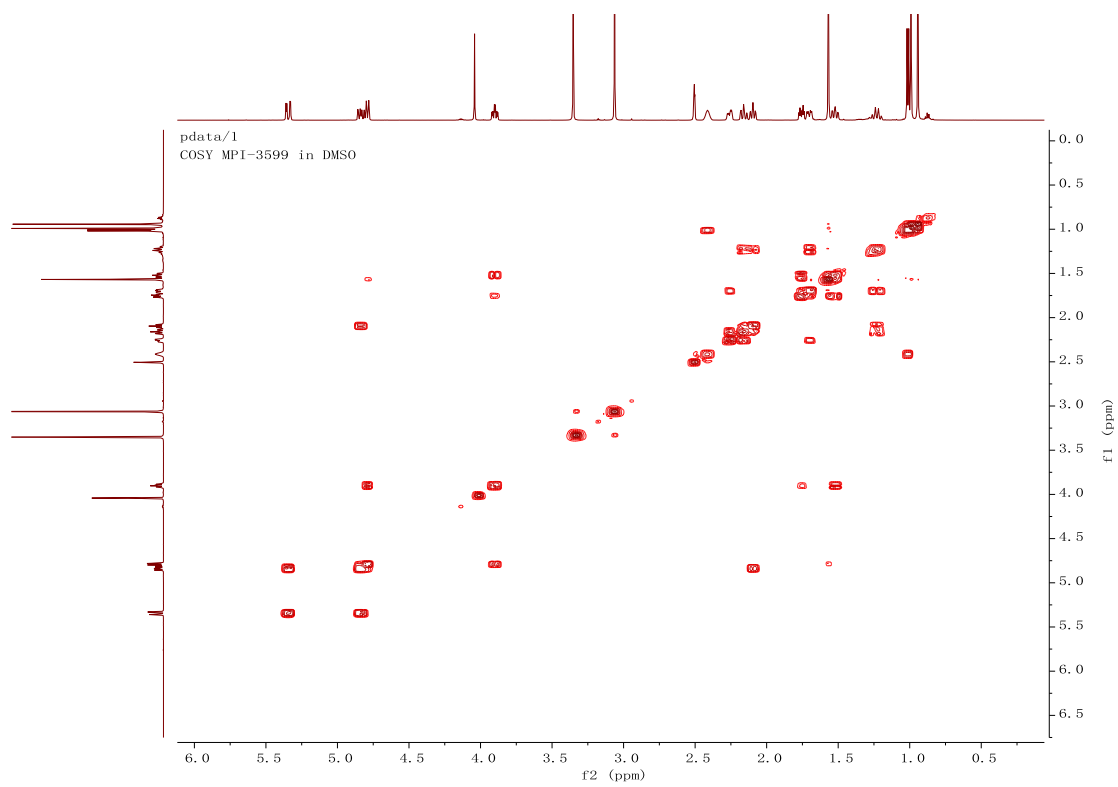

Figure S53. COSY spectrum of the new compound **14**

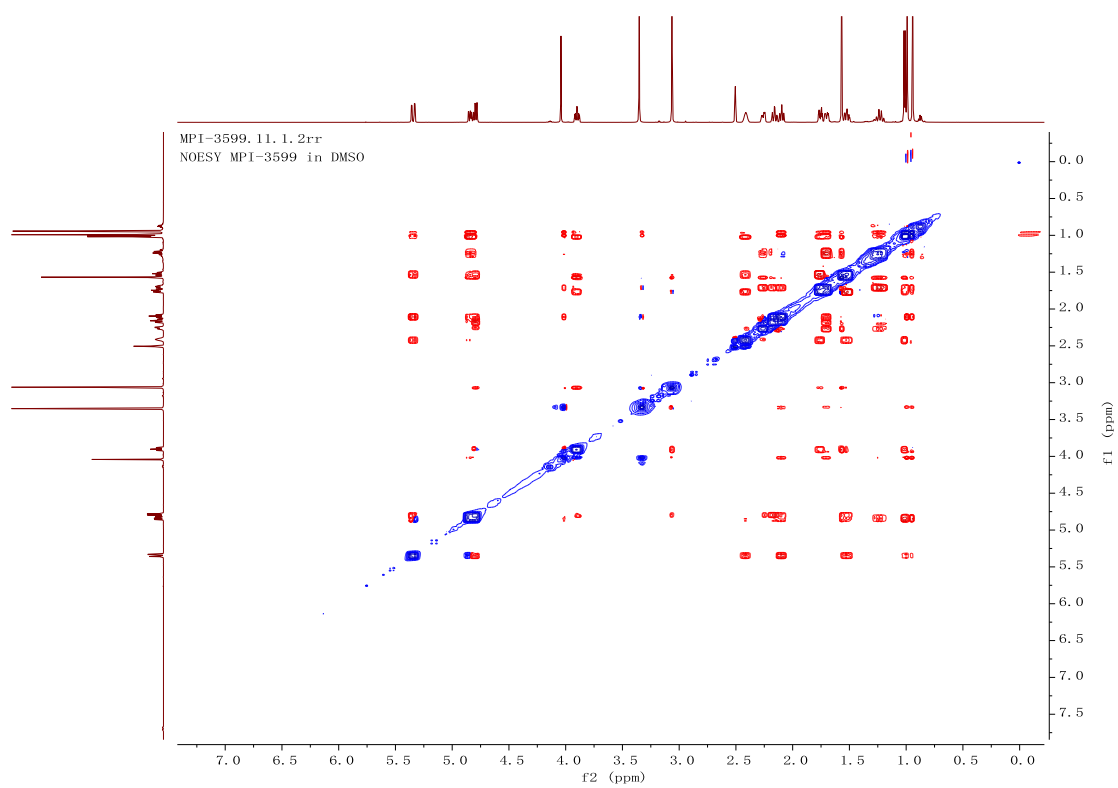

Figure S54. NOESY spectrum of the new compound **14**

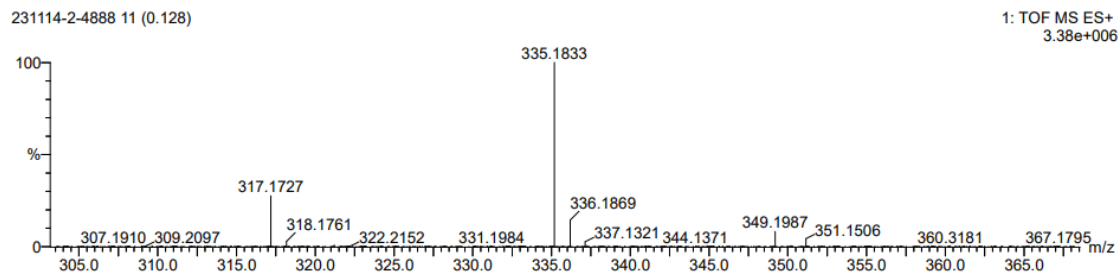

Figure S55. HRESI-MS spectrum of the new compound **15**

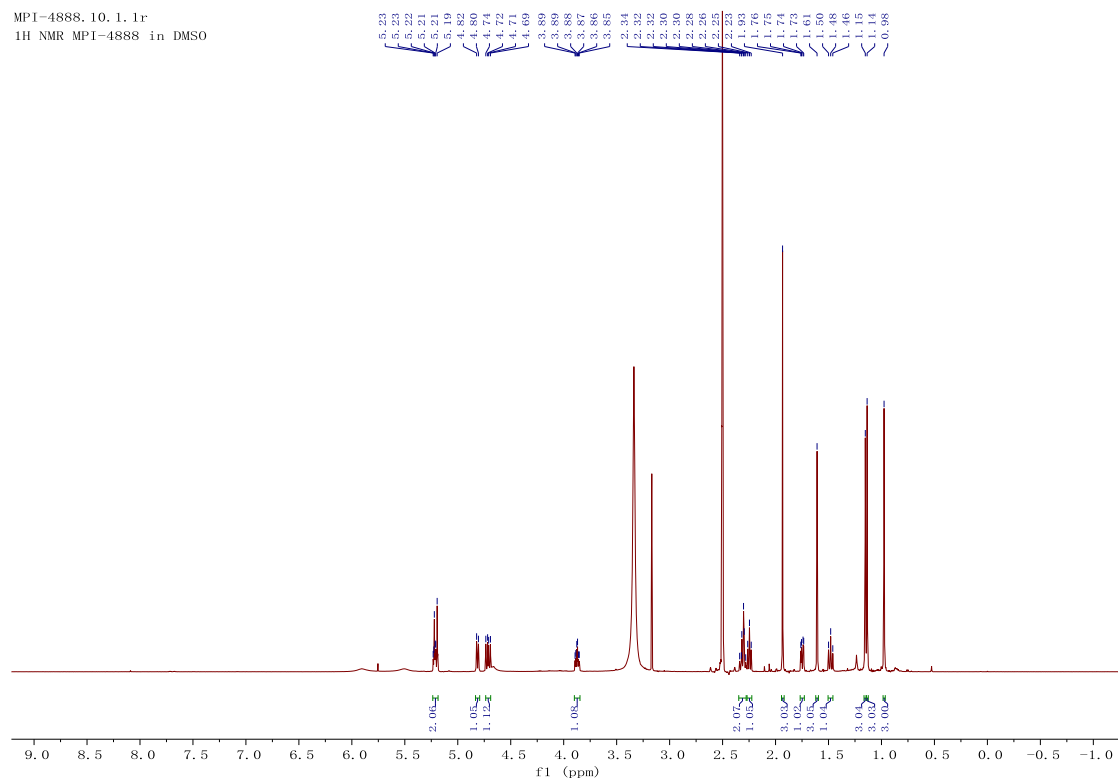

Figure S56.  $^1\text{H}$  NMR (600 MHz,  $\text{DMSO}-d_6$ ) spectrum of the new compound **15**

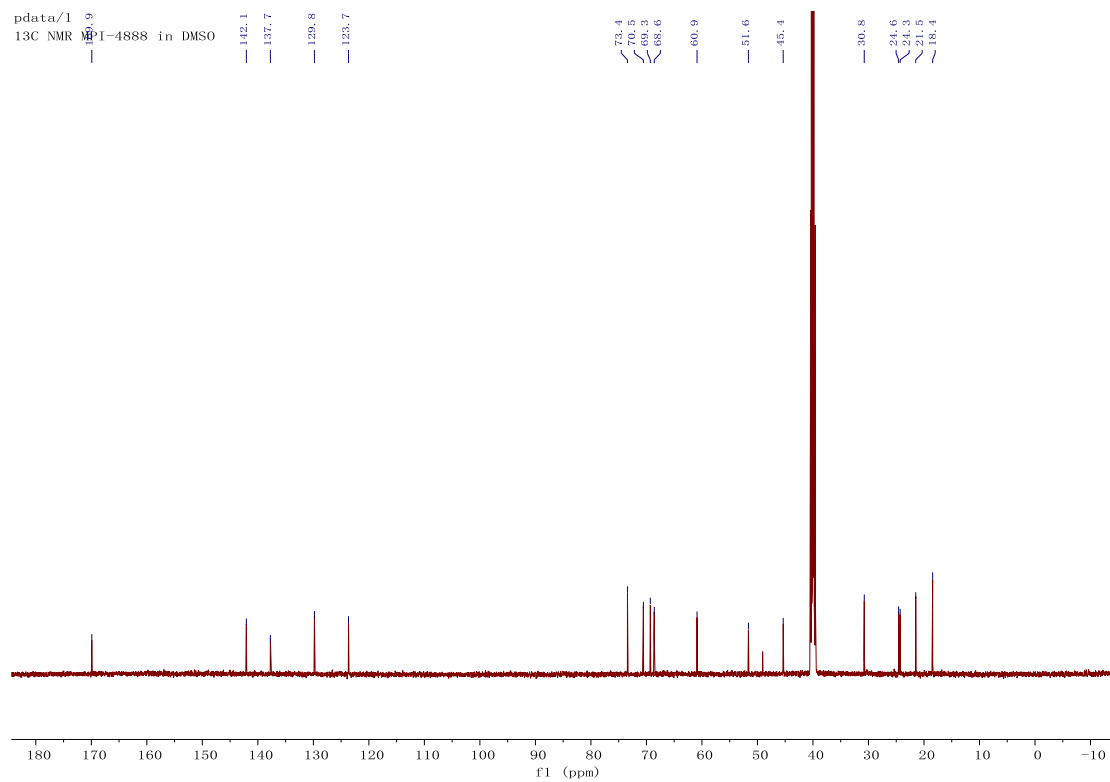

Figure S57.  $^{13}\text{C}$  NMR (150 MHz,  $\text{DMSO-}d_6$ ) spectrum of the new compound **15**

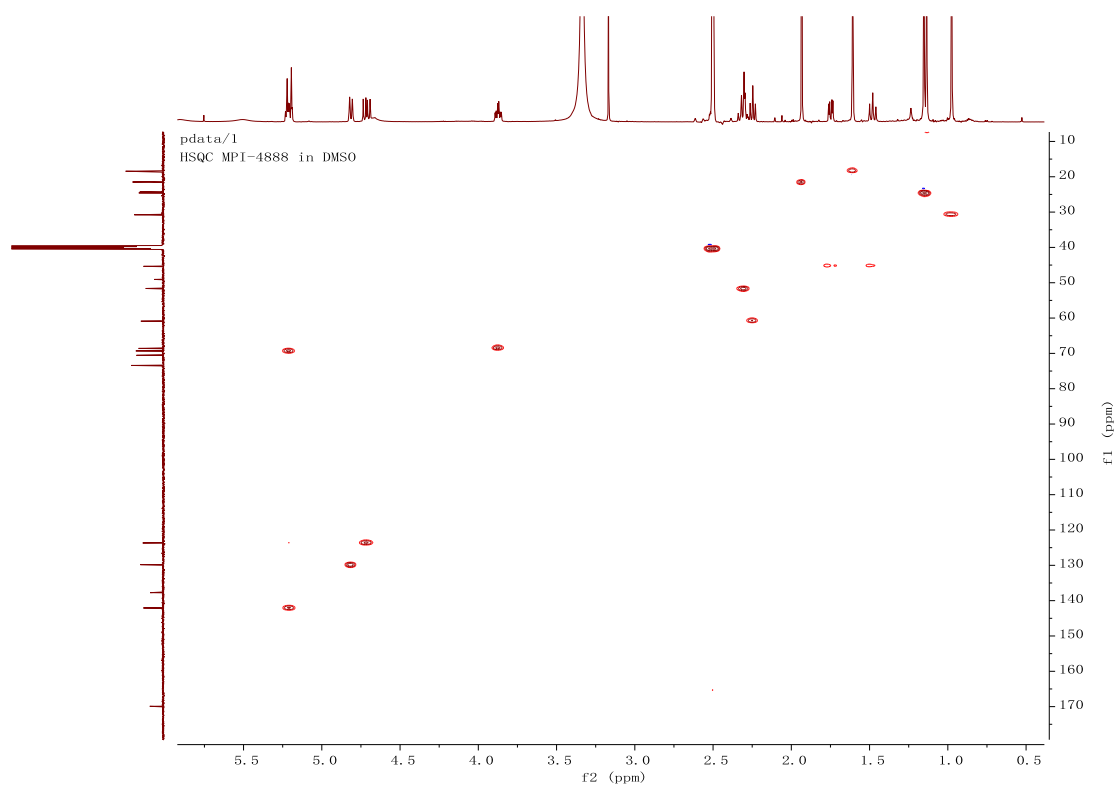

Figure S58. HSQC spectrum of the new compound **15**

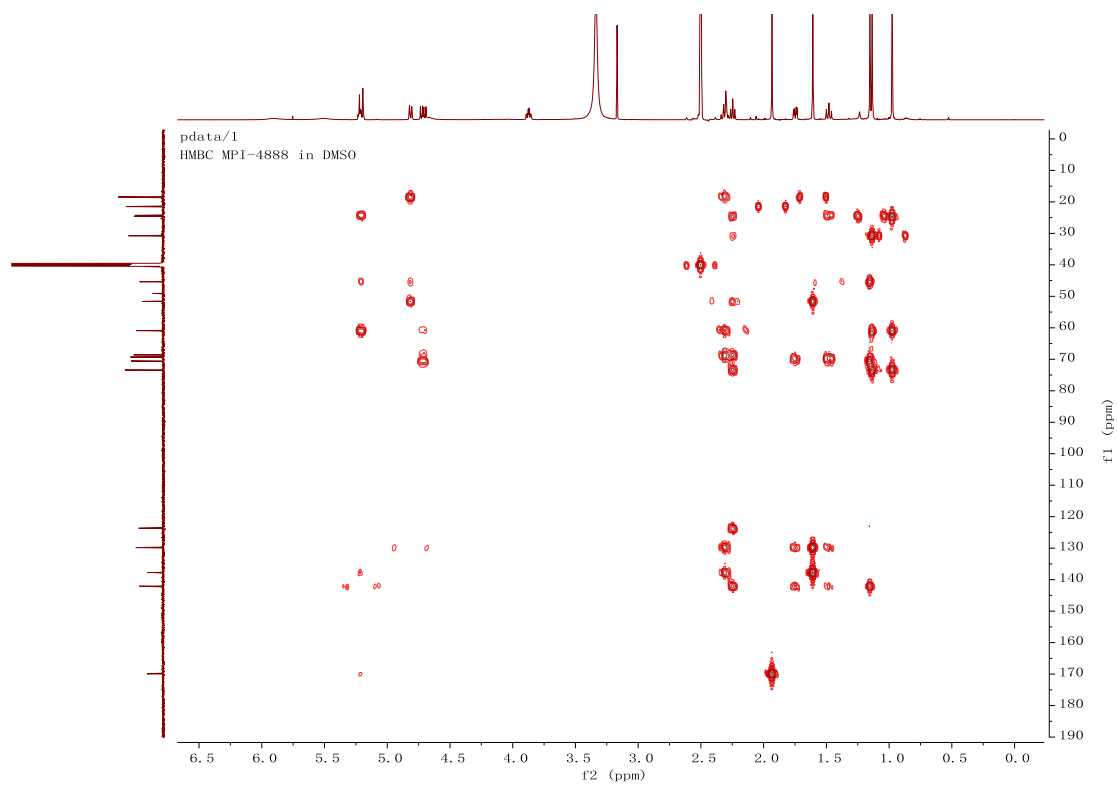

Figure S59. HMBC spectrum of the new compound **15**

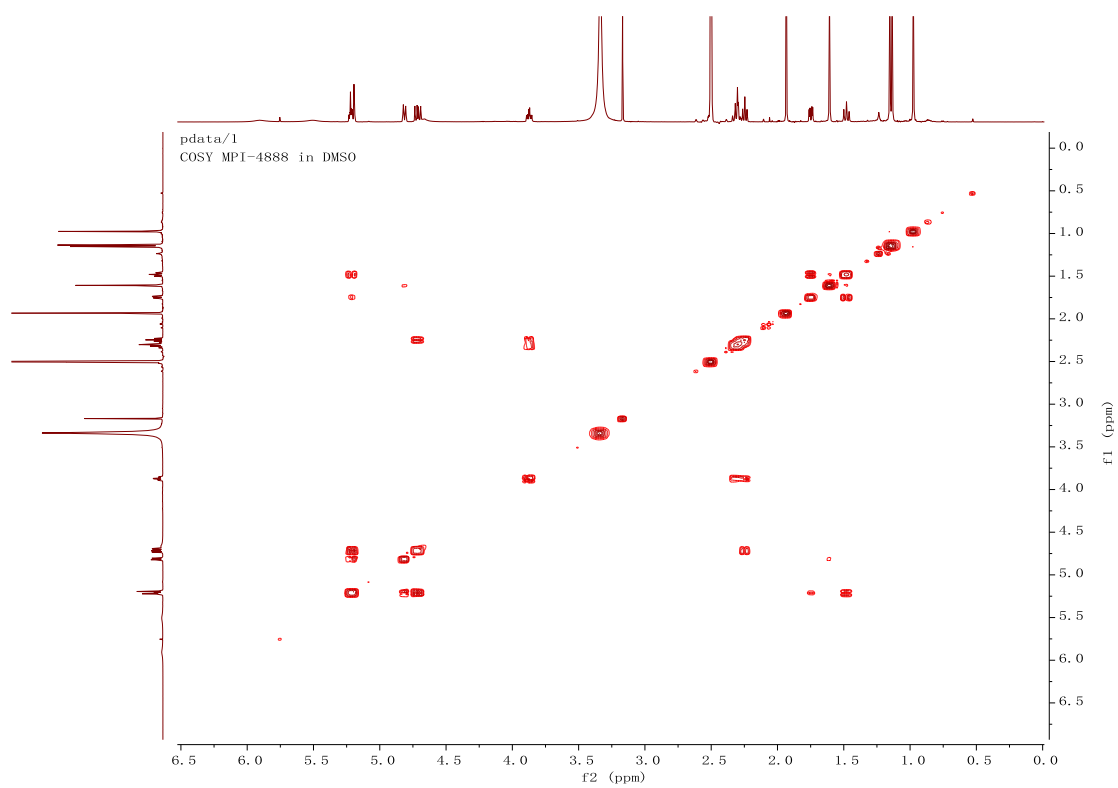

Figure S60. COSY spectrum of the new compound **15**

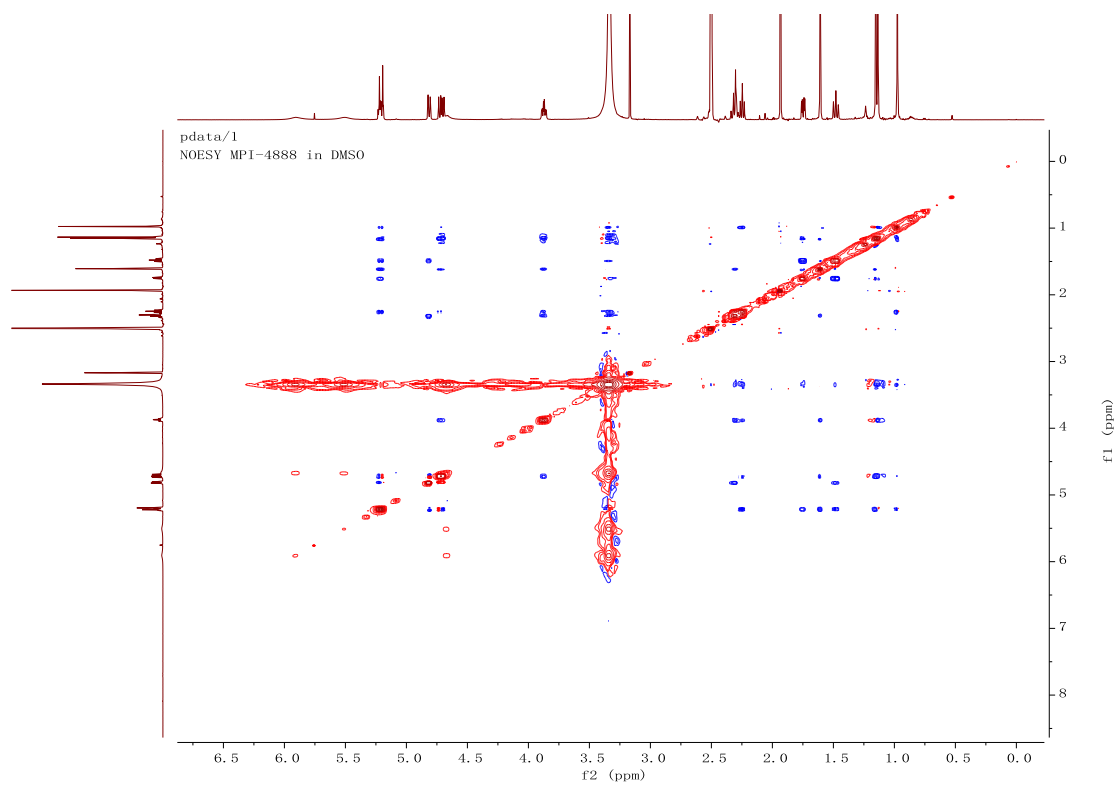

Figure S61. NOESY spectrum of the new compound **15**

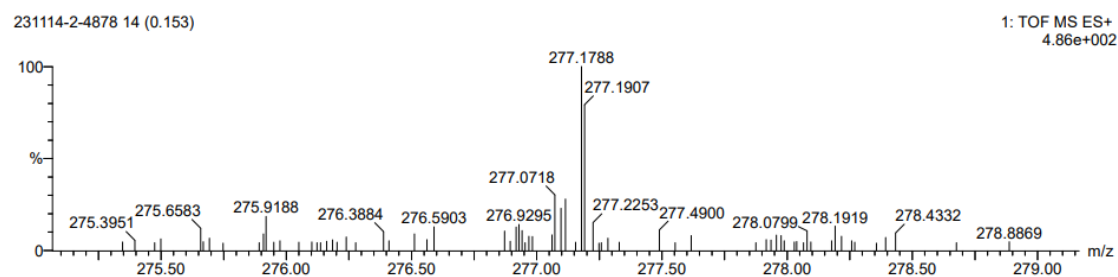

Figure S62. HRESI-MS spectrum of the new compound **17**

MPI-4878.10.1.1r  
1H NMR MPI-4878 in DMSO

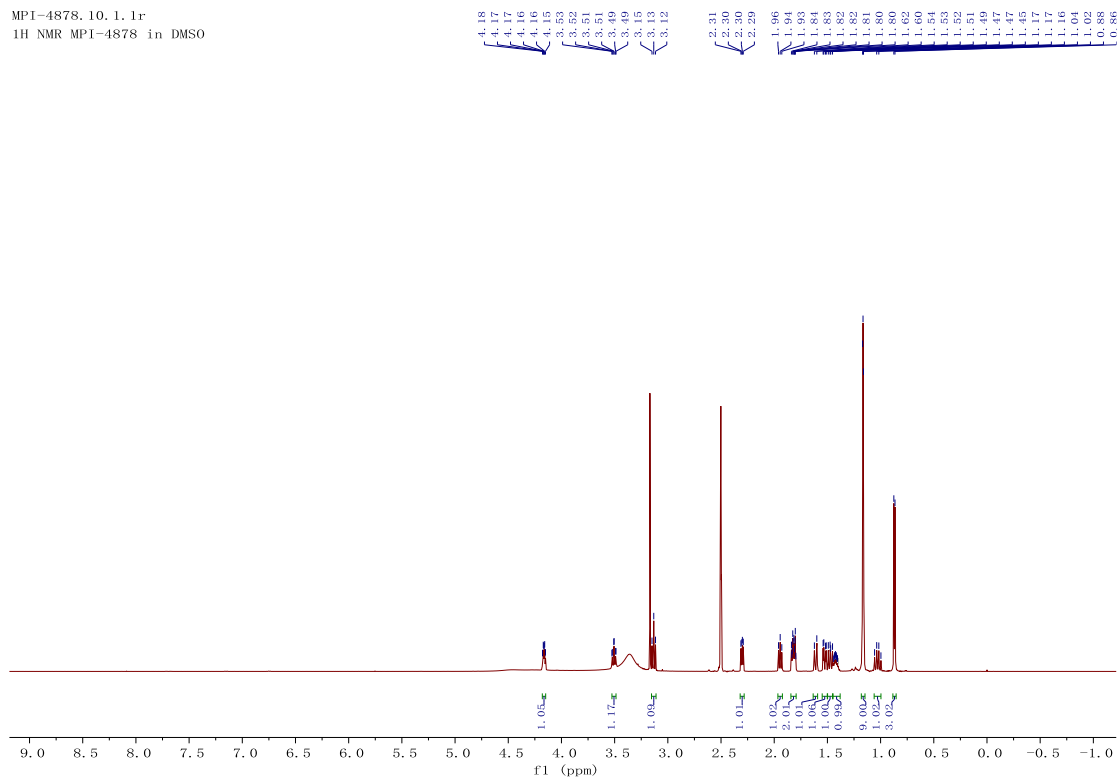

Figure S63.  $^1\text{H}$  NMR (600 MHz,  $\text{DMSO}-d_6$ ) spectrum of the new compound **17**

pdata/1  
13C NMR MPI-4878 in DMSO

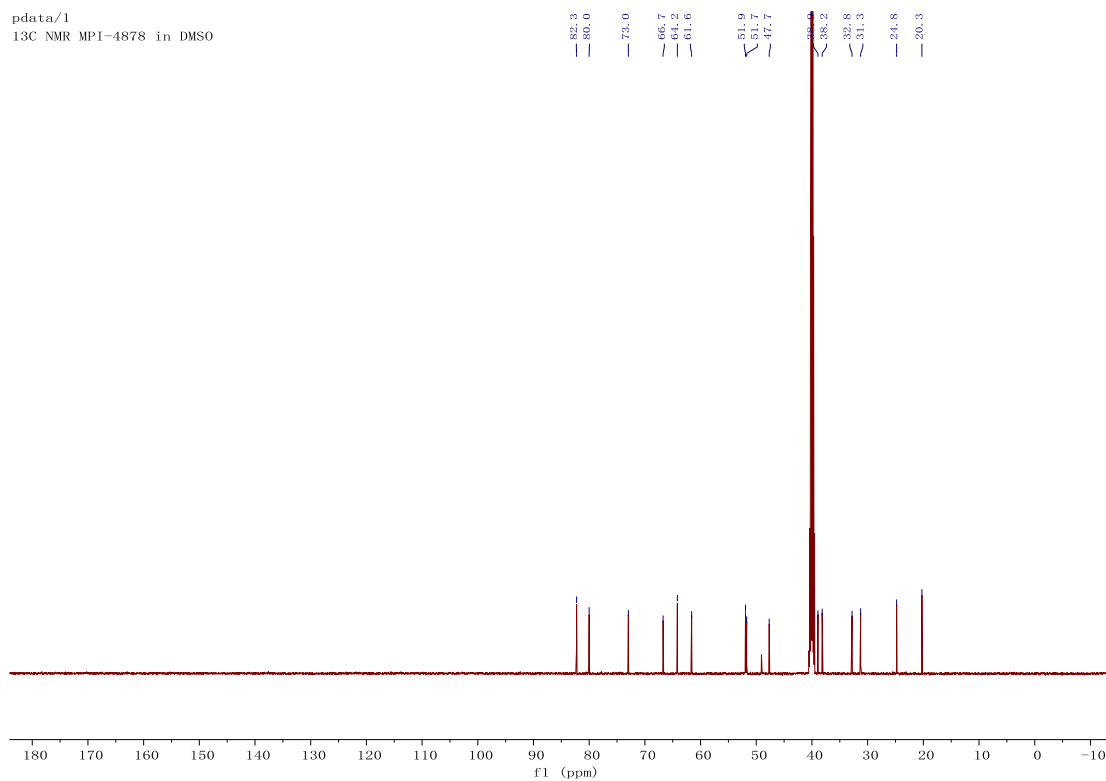

Figure S64.  $^{13}\text{C}$  NMR (150 MHz,  $\text{DMSO}-d_6$ ) spectrum of the new compound **17**

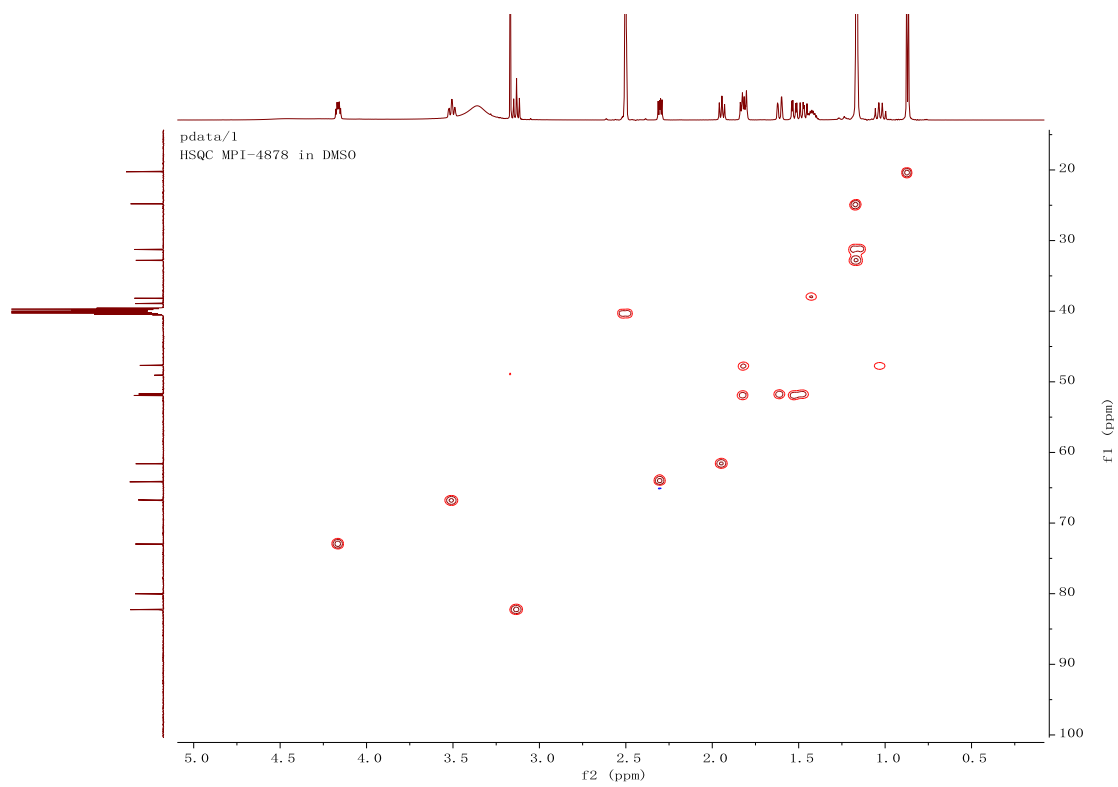

Figure S65. HSQC spectrum of the new compound **17**

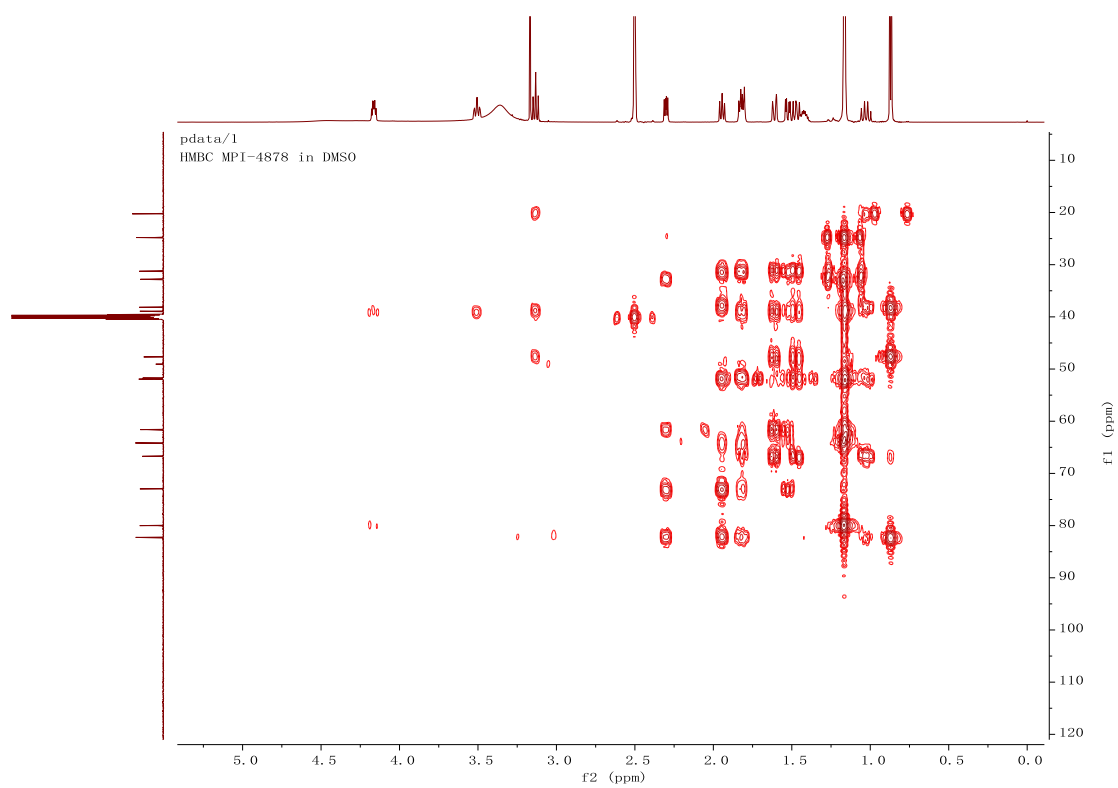

Figure S66. HMBC spectrum of the new compound **17**



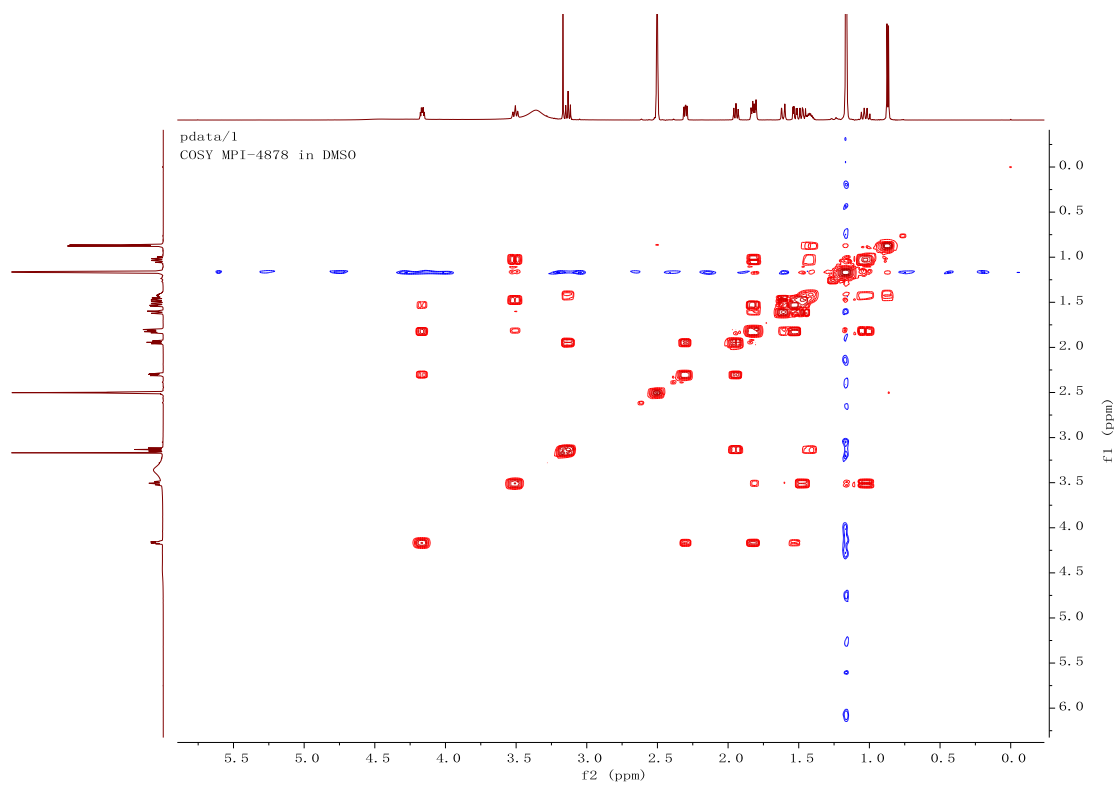

Figure S67. COSY spectrum of the new compound **17**

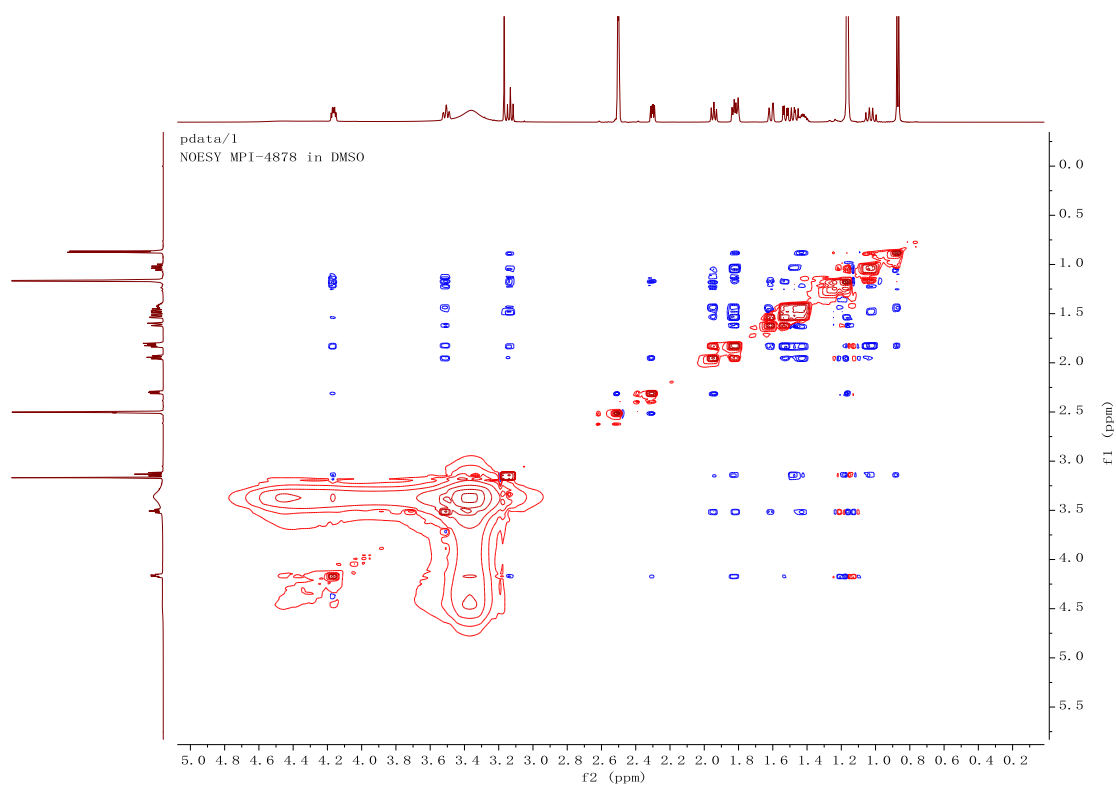

Figure S68. NOESY spectrum of the new compound **17**

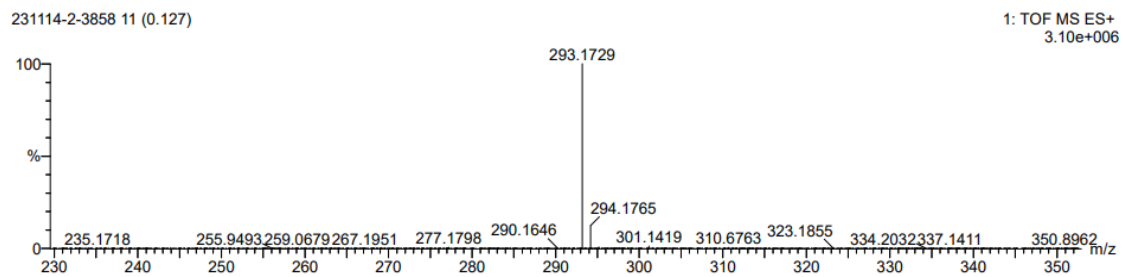

Figure S69. HRESI-MS spectrum of the new compound **18**

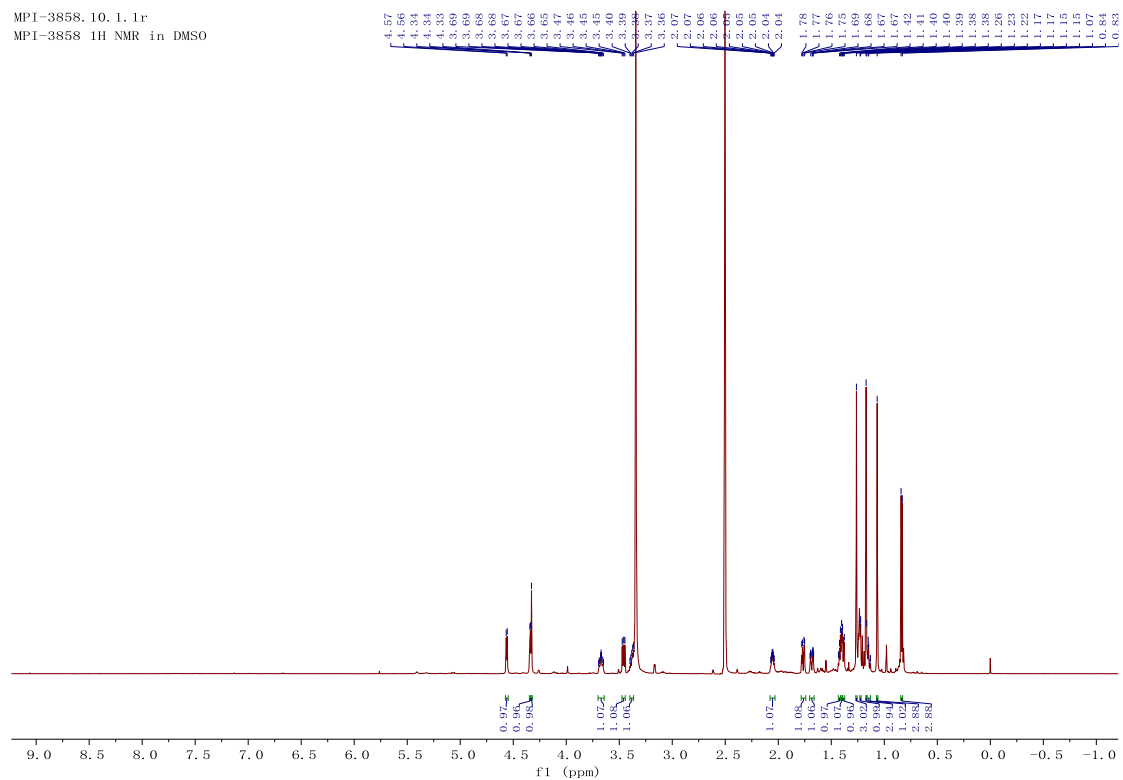

Figure S70. <sup>1</sup>H NMR (600 MHz, DMSO-*d*<sub>6</sub>) spectrum of the new compound **18**

MPI-3858.20.1.1r  
MPI-3858 <sup>13</sup>C NMR in DMSO

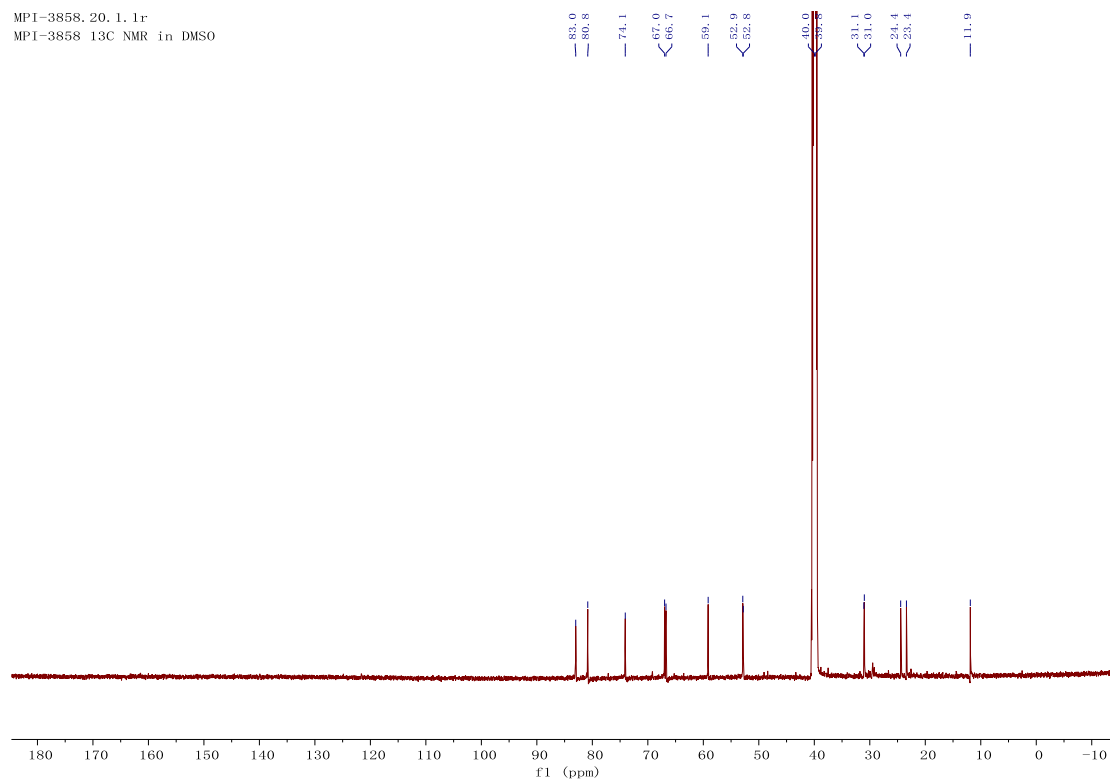

Figure S71. <sup>13</sup>C NMR (150 MHz, DMSO-*d*<sub>6</sub>) spectrum of the new compound **18**

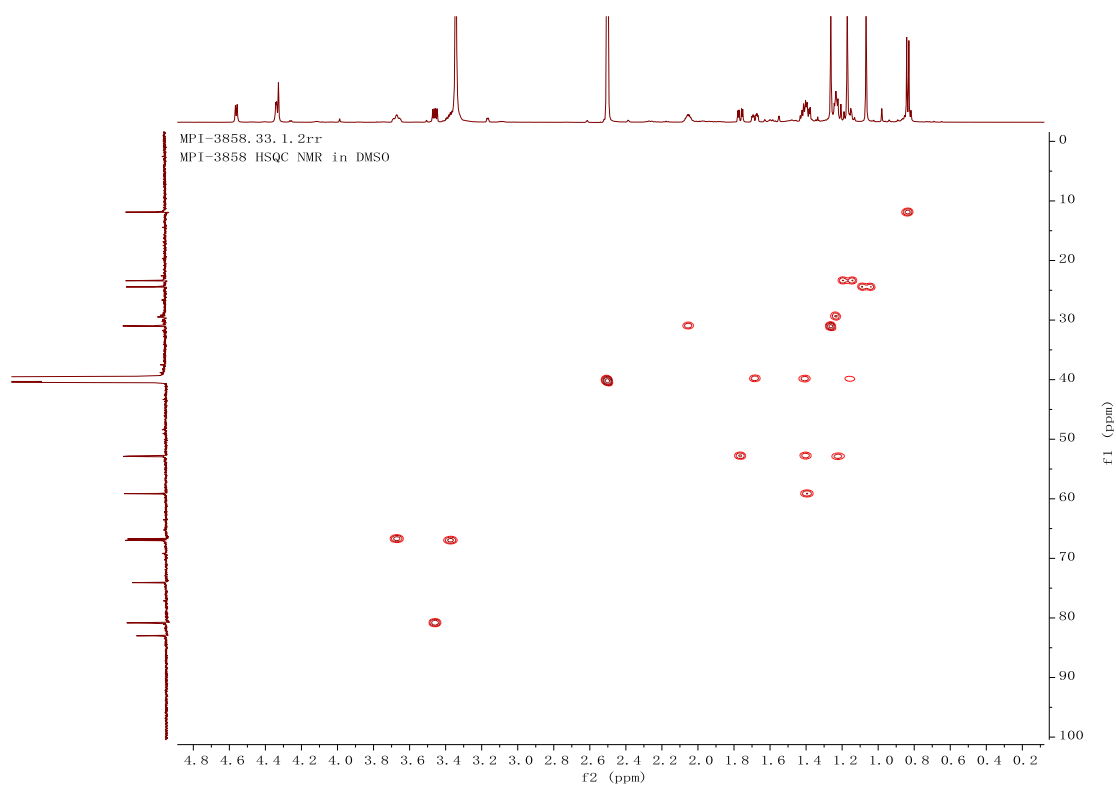

Figure S72. HSQC spectrum of the new compound **18**

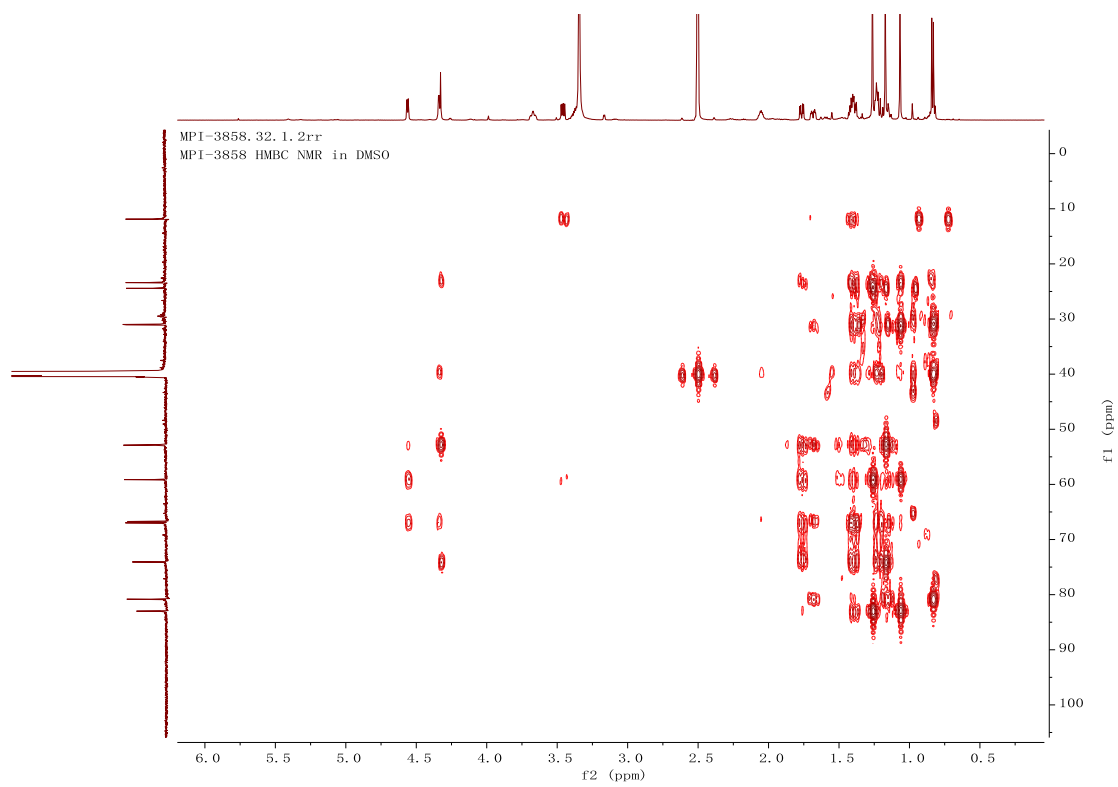

Figure S73. HMBC spectrum of the new compound **18**

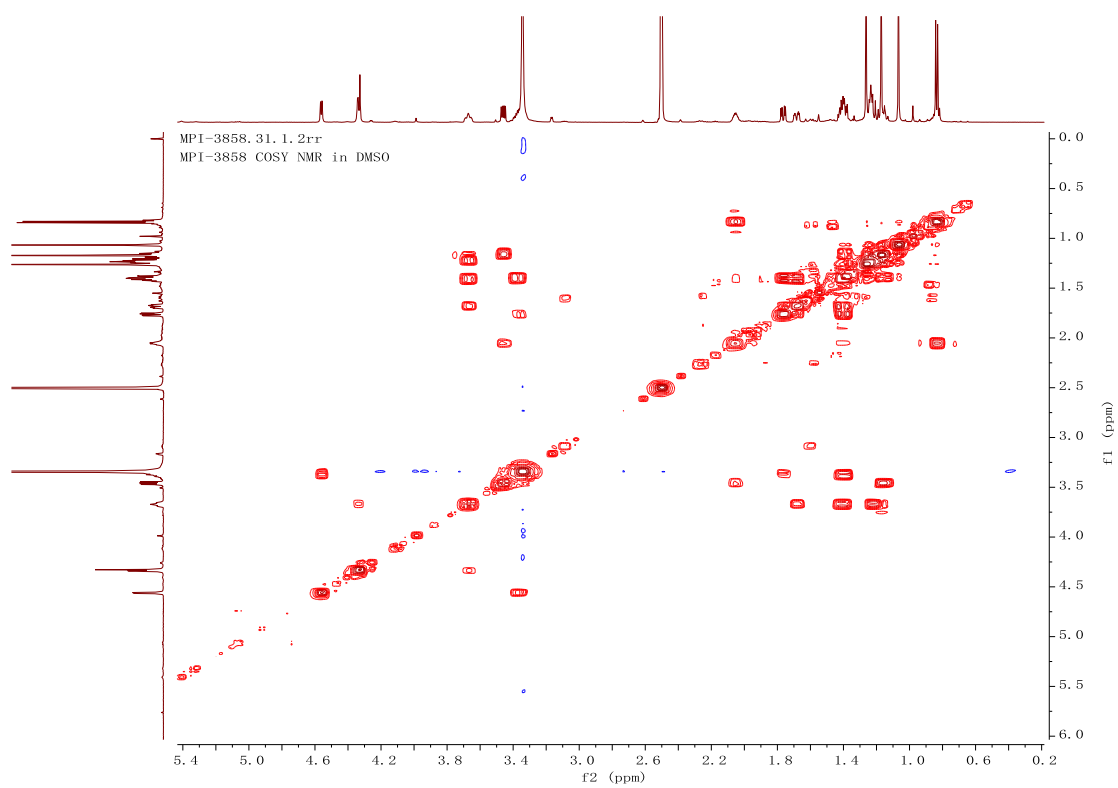

Figure S74. COSY spectrum of the new compound **18**

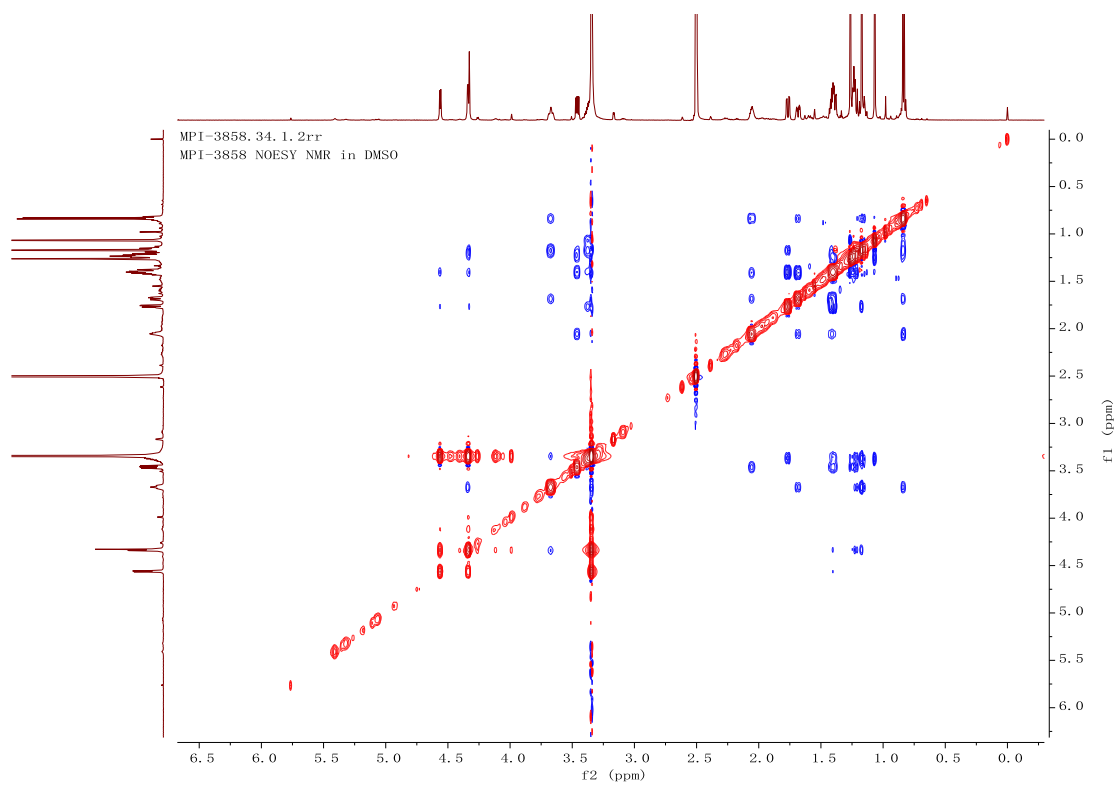

Figure S75. NOESY spectrum of the new compound **18**

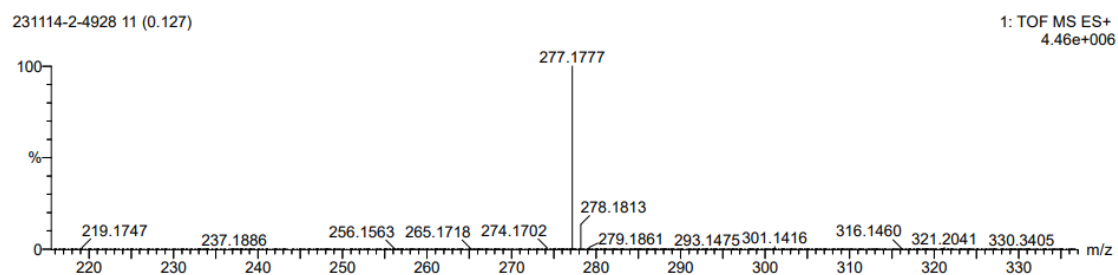

Figure S76. HRESI-MS spectrum of the new compound **22**

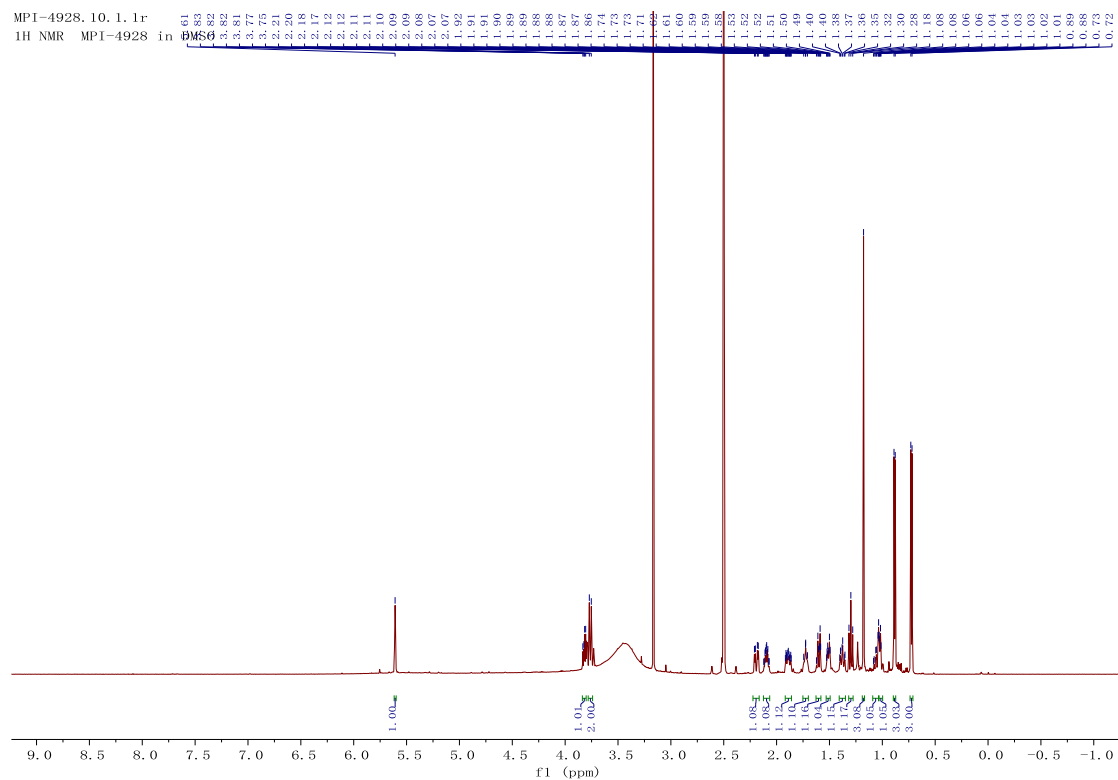

Figure S77.  $^1\text{H}$  NMR (600 MHz,  $\text{DMSO-}d_6$ ) spectrum of the new compound **22**

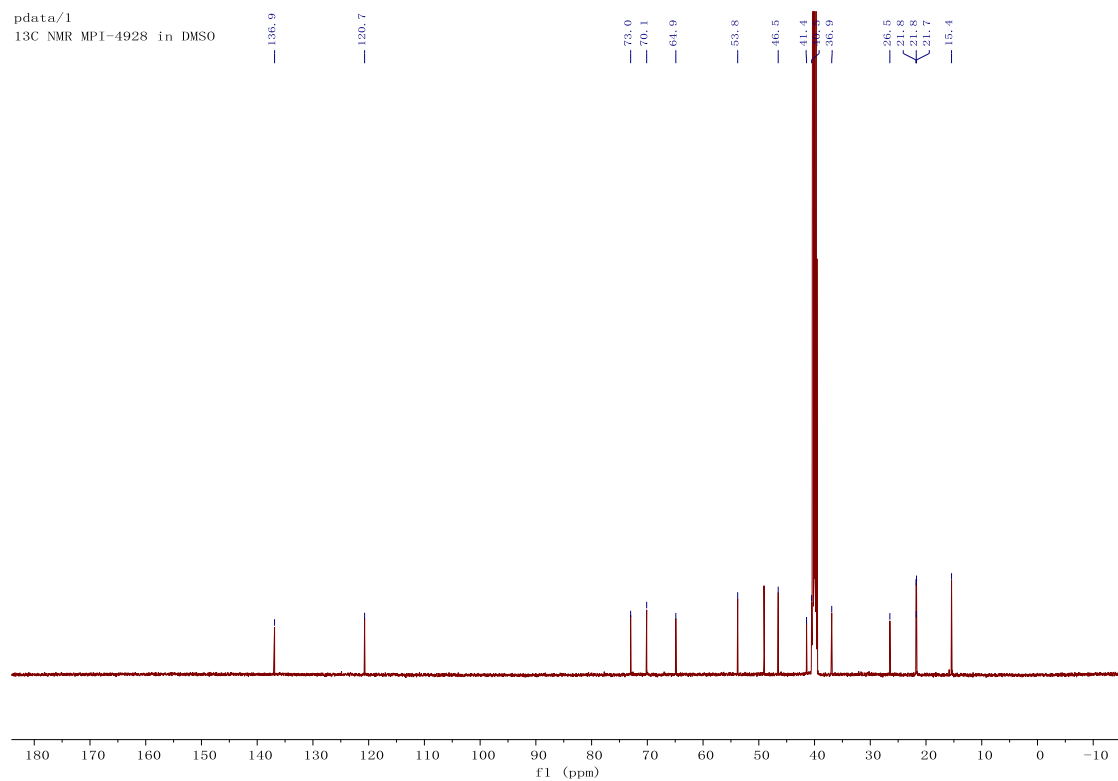

Figure S78.  $^{13}\text{C}$  NMR (150 MHz,  $\text{DMSO-}d_6$ ) spectrum of the new compound **22**

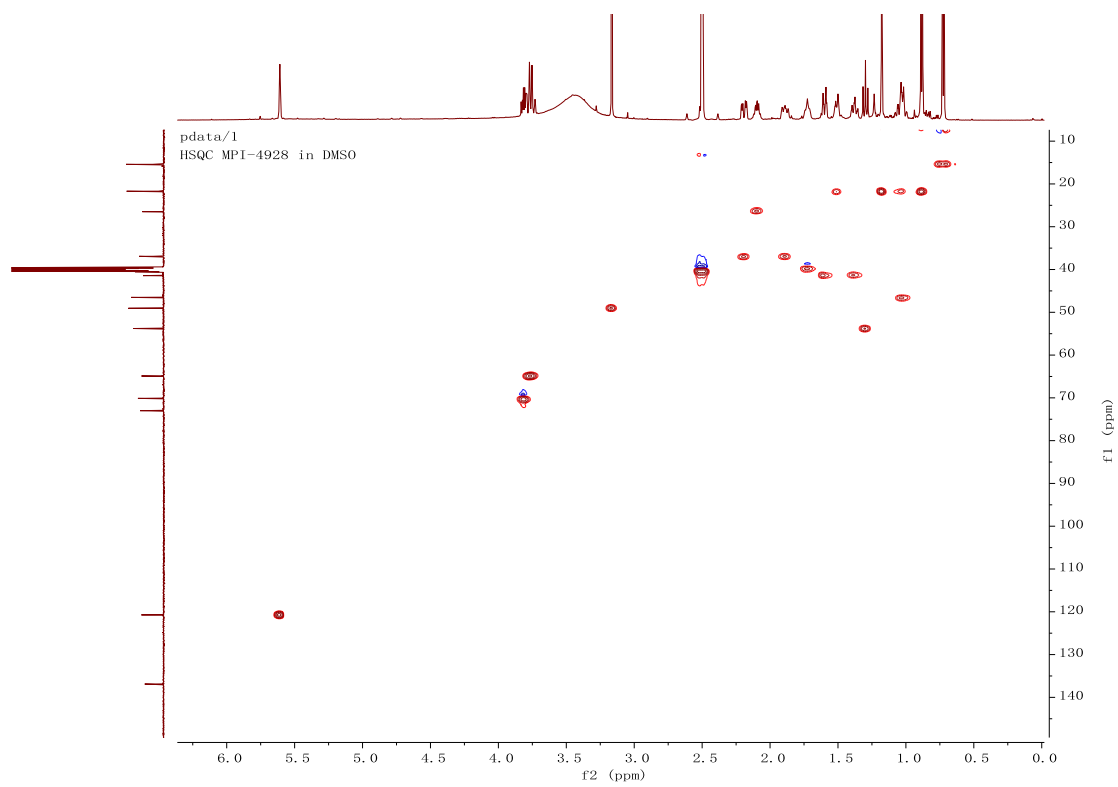

Figure S79. HSQC spectrum of the new compound **22**

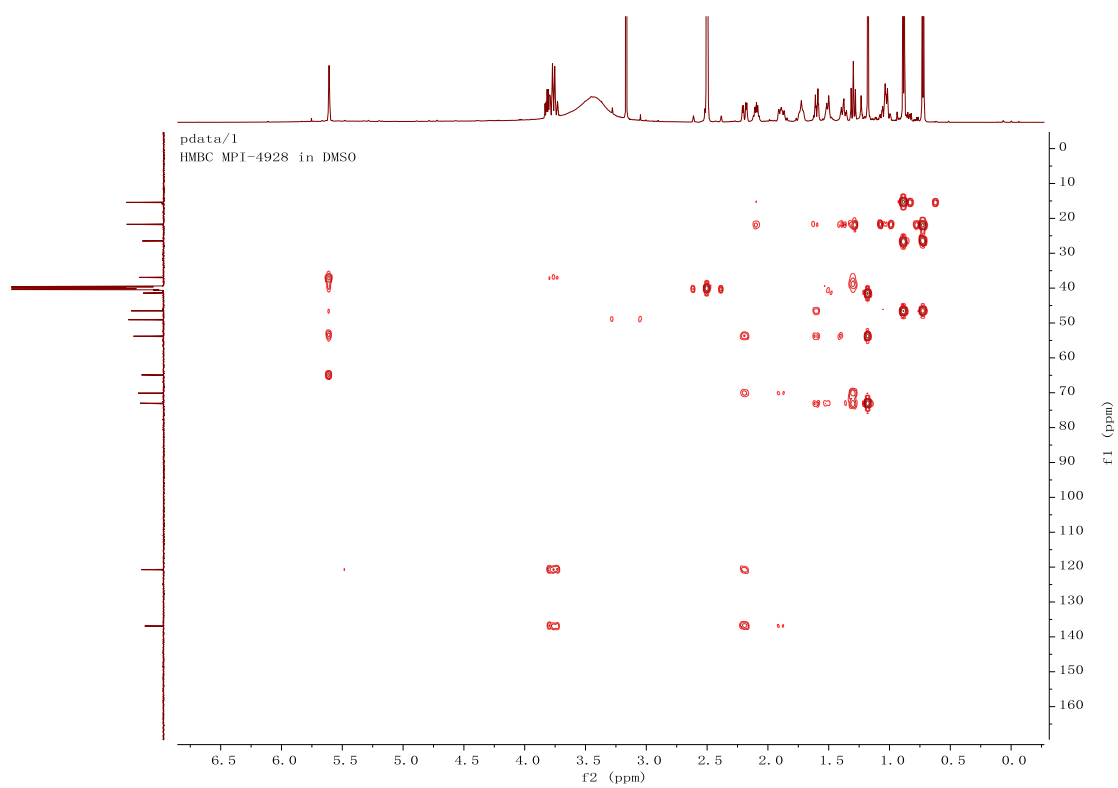

Figure S80. HMBC spectrum of the new compound **22**

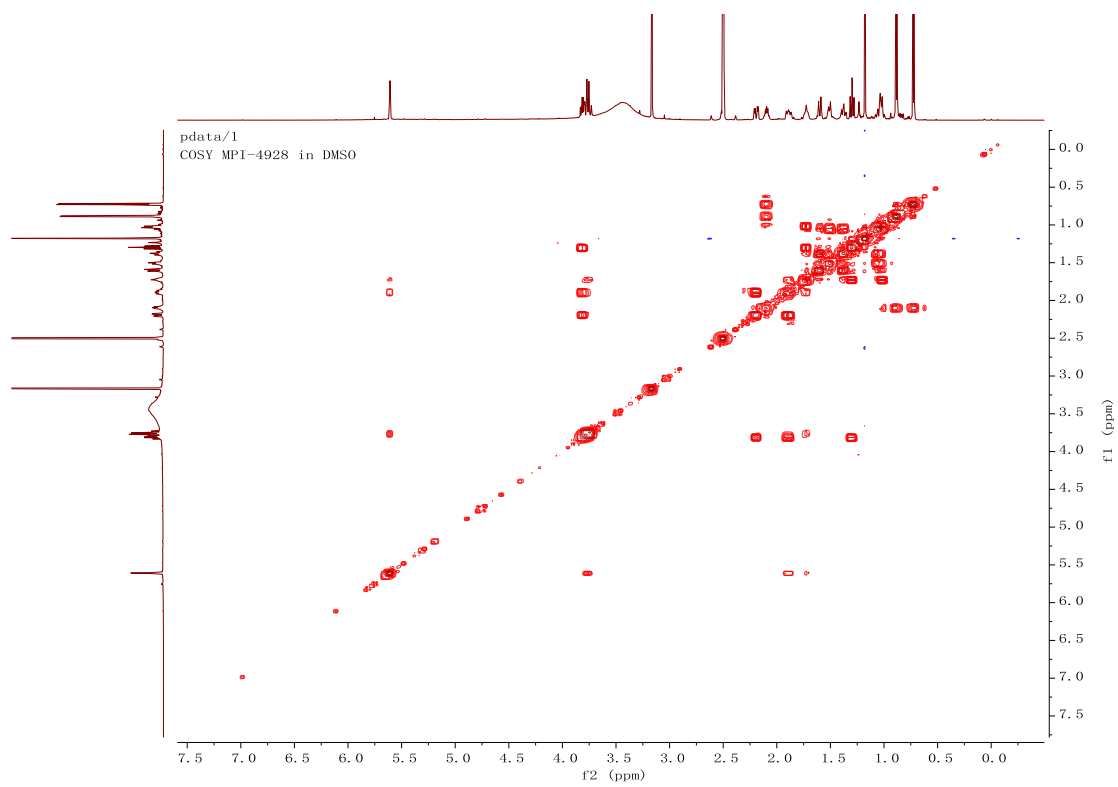

Figure S81. COSY spectrum of the new compound **22**

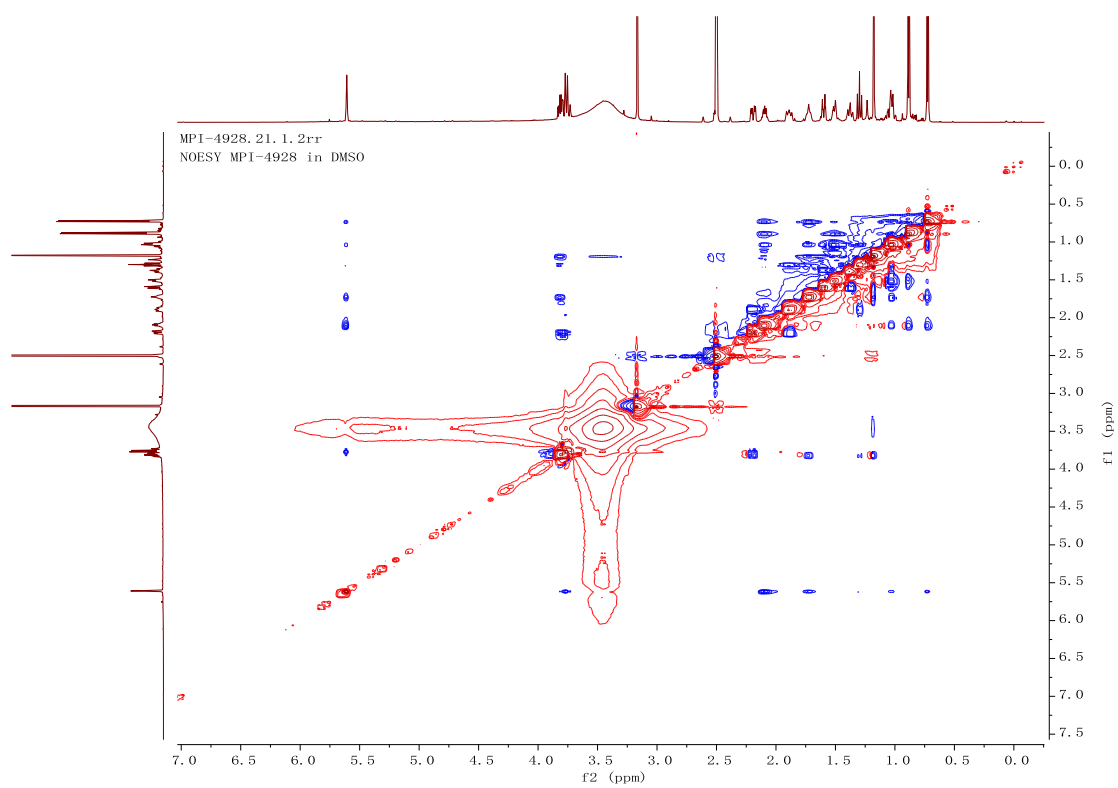

Figure S82. NOESY spectrum of the new compound **22**



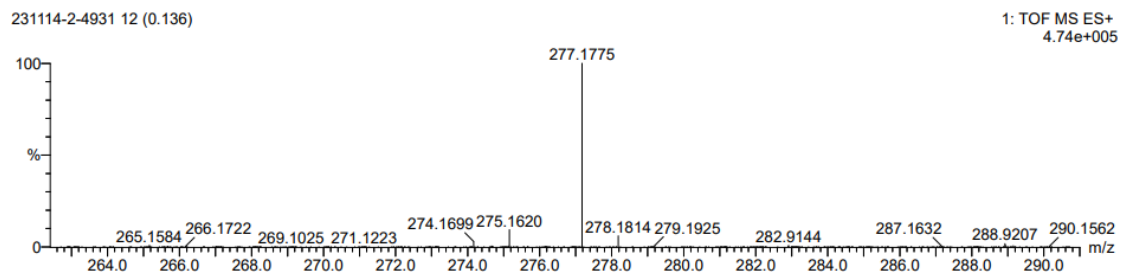

Figure S83. HRESI-MS spectrum of the new compound **23**

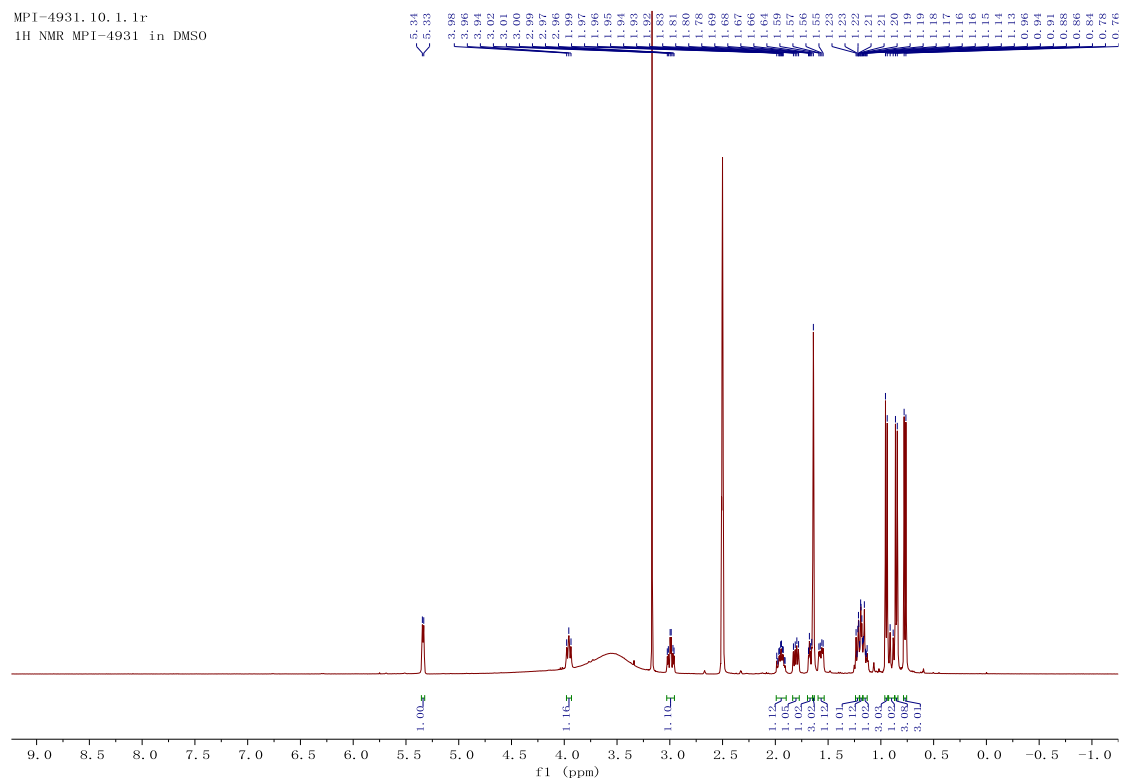

Figure S84.  $^1\text{H}$  NMR (600 MHz,  $\text{DMSO-}d_6$ ) spectrum of the new compound **23**

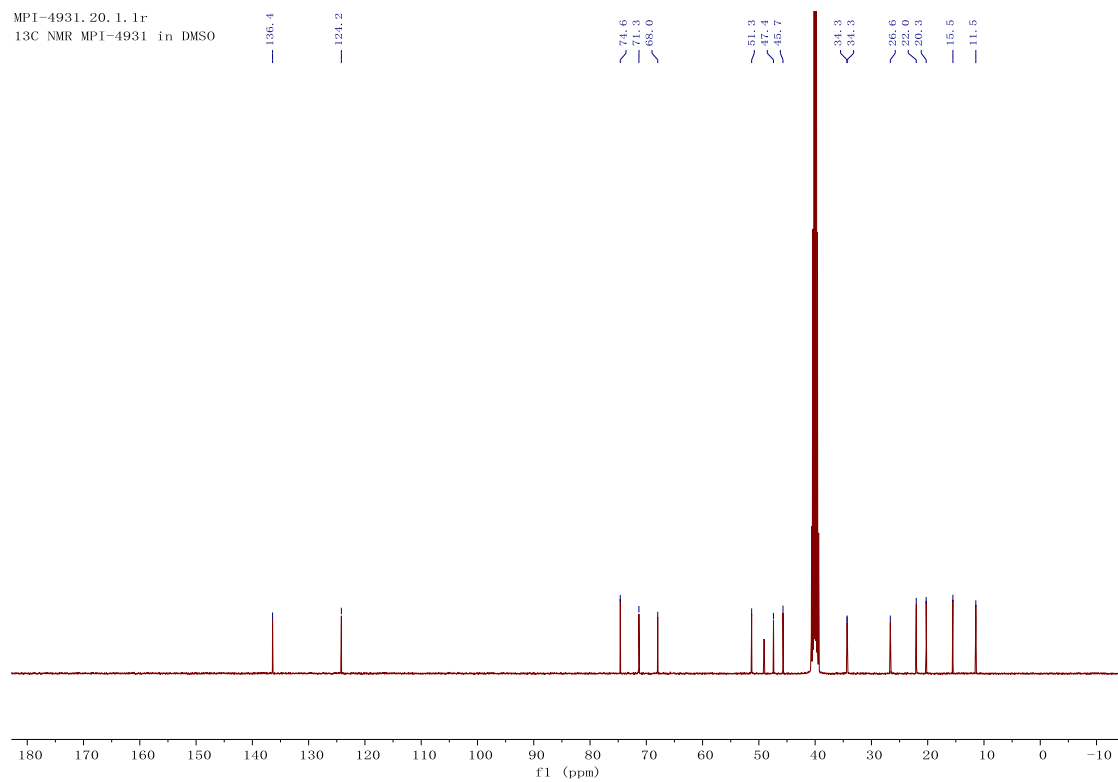

Figure S85. <sup>13</sup>C NMR (150 MHz, DMSO-*d*<sub>6</sub>) spectrum of the new compound **23**

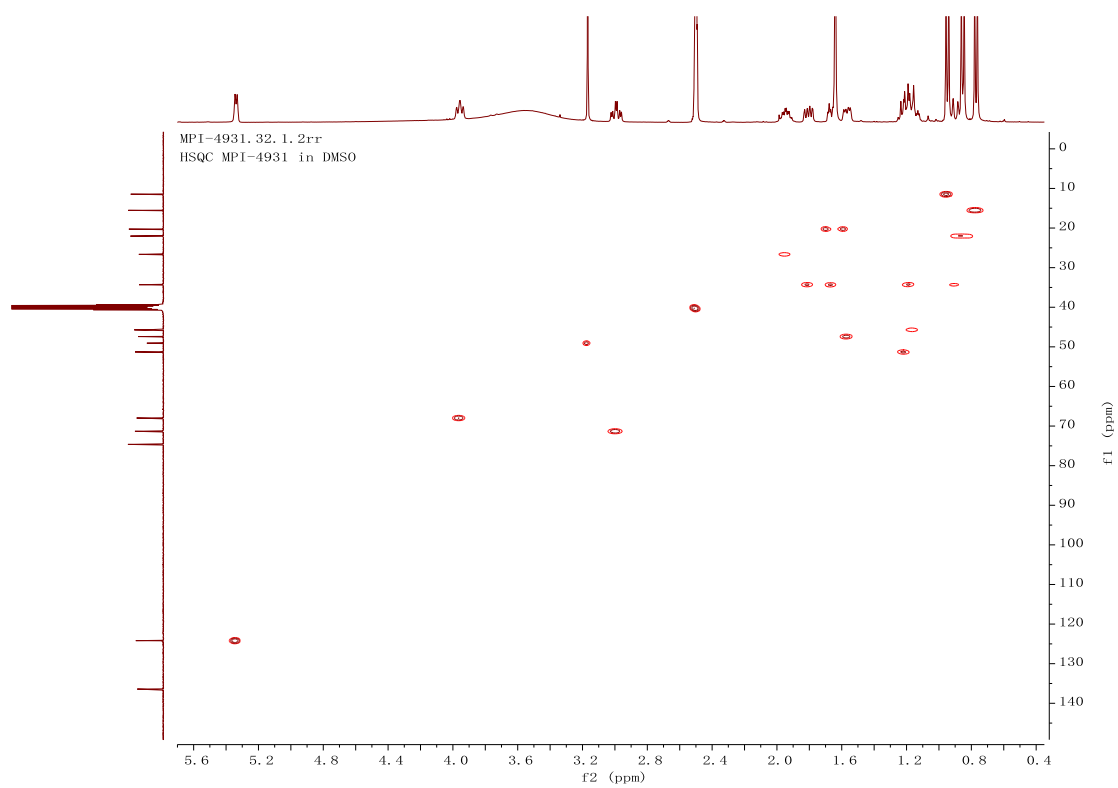

Figure S86. HSQC spectrum of the new compound **23**

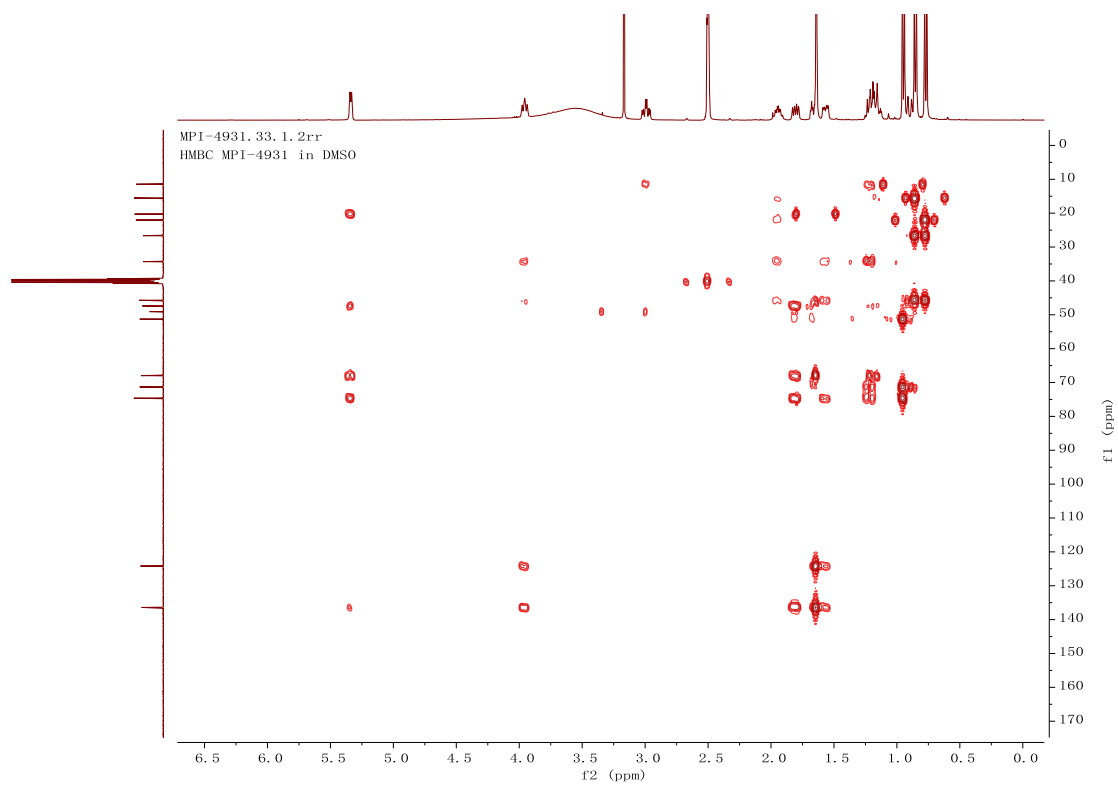

Figure S87. HMBC spectrum of the new compound **23**

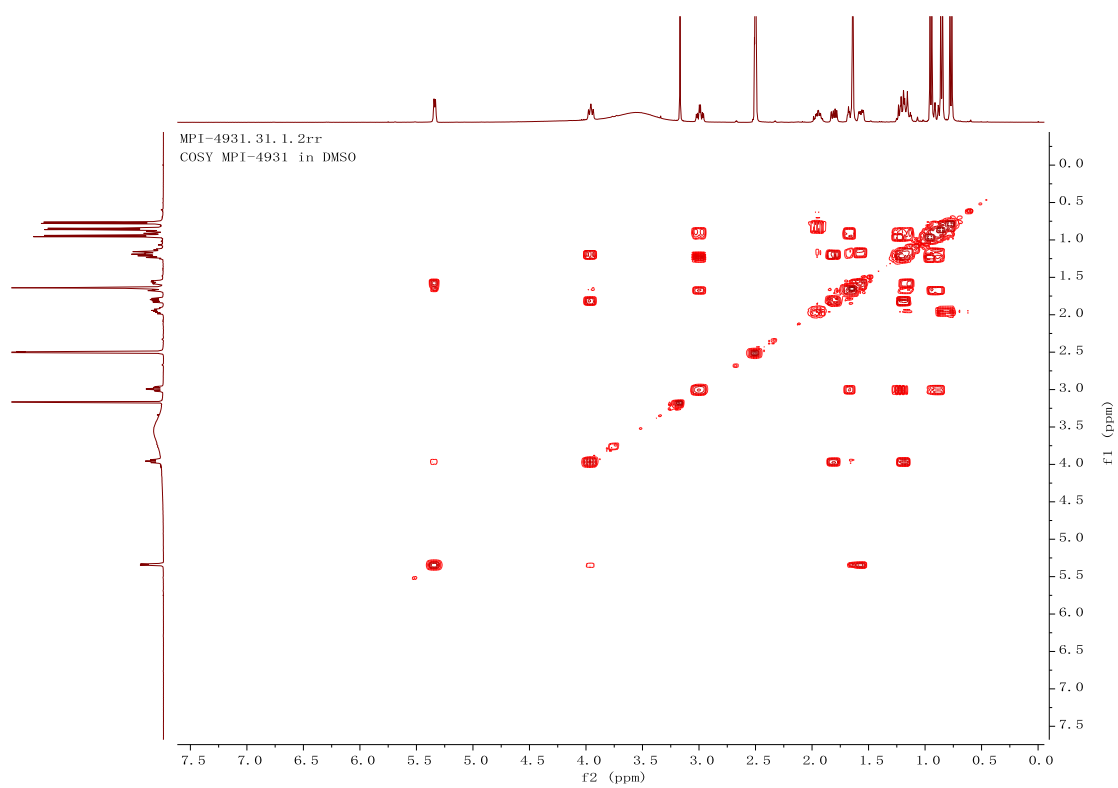

Figure S88. COSY spectrum of the new compound **23**

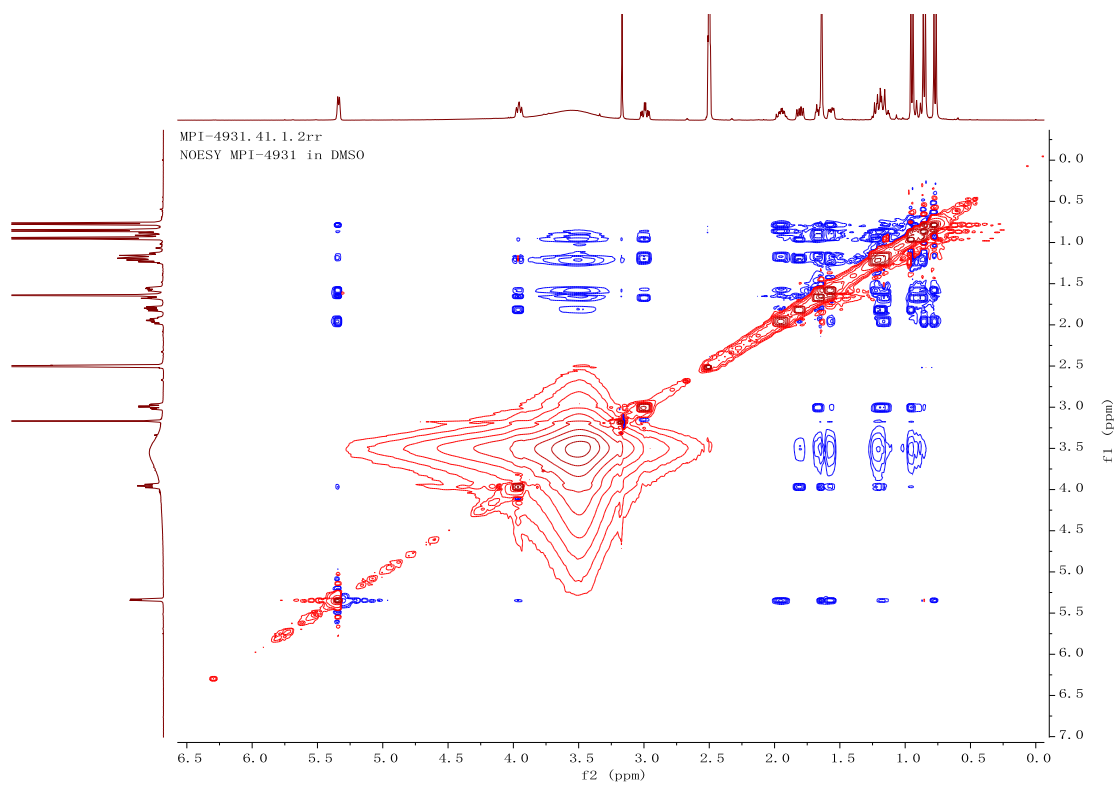

Figure S89. NOESY spectrum of the new compound **23**

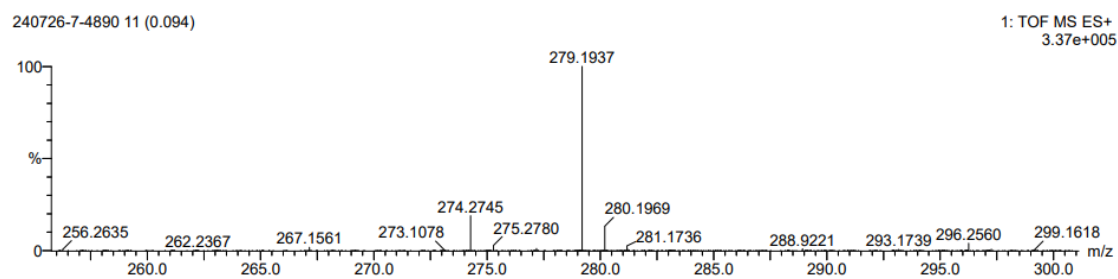

Figure S90. HRESI-MS spectrum of the new compound **25**

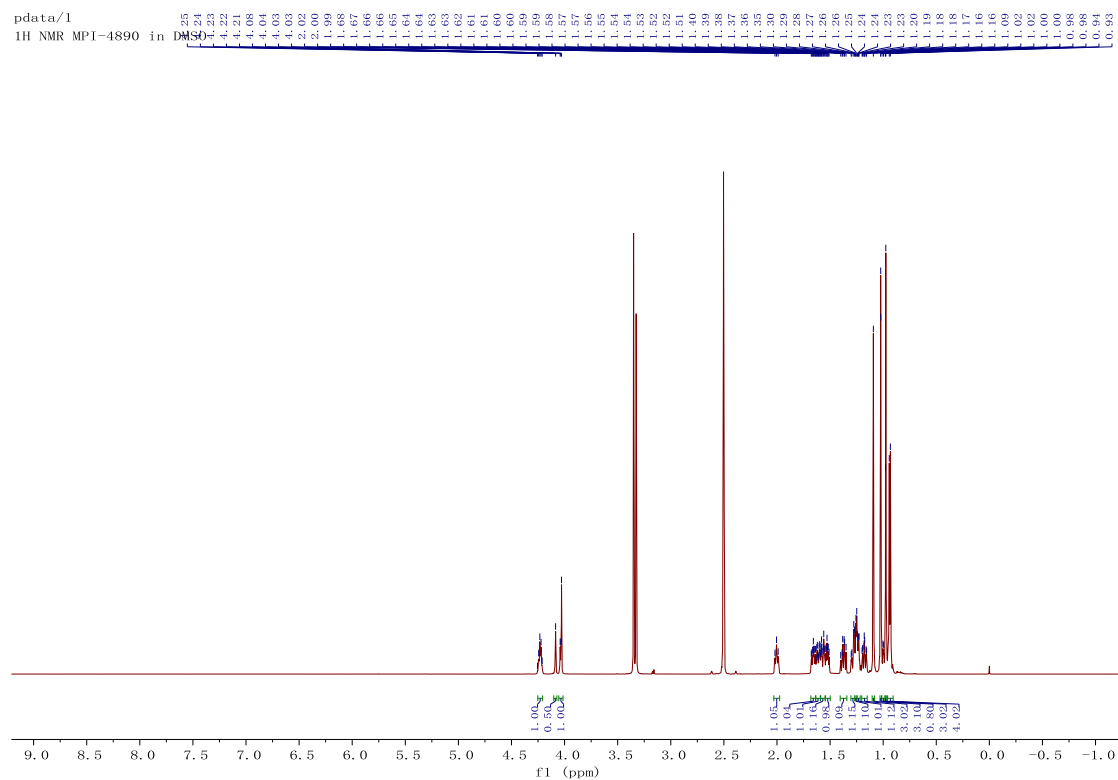

Figure S91. <sup>1</sup>H NMR (600 MHz, DMSO-*d*<sub>6</sub>) spectrum of the new compound **25**

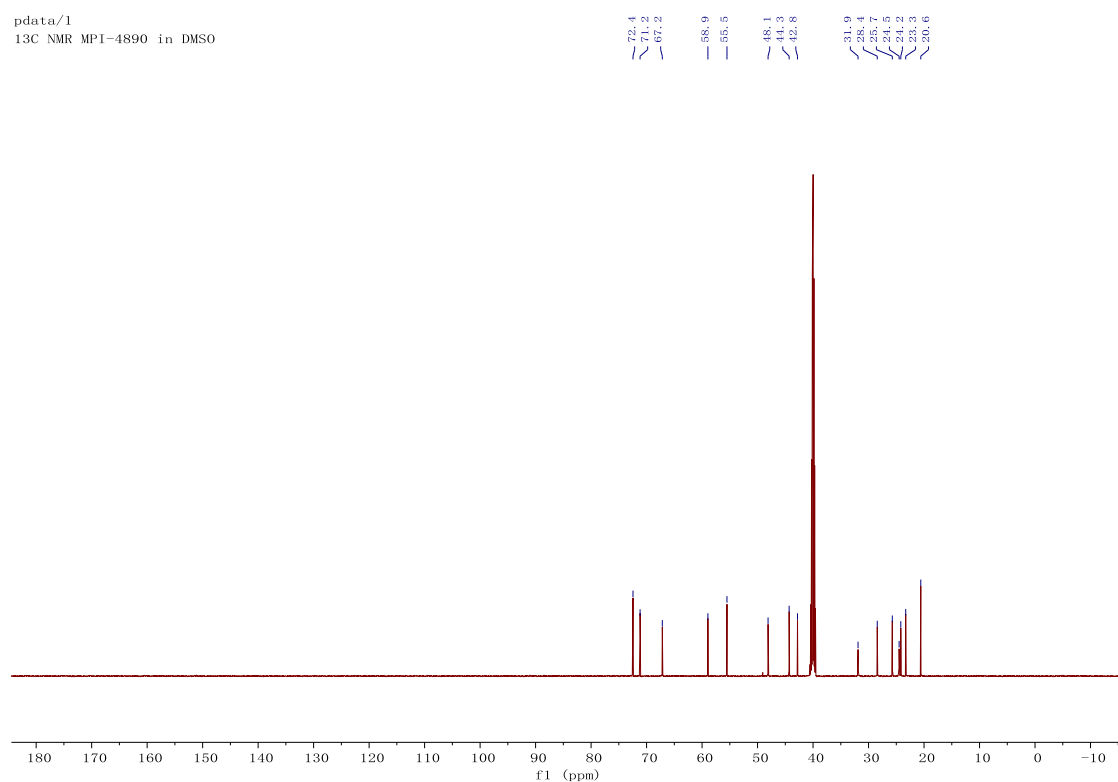

Figure S92. <sup>13</sup>C NMR (150 MHz, DMSO-*d*<sub>6</sub>) spectrum of the new compound **25**

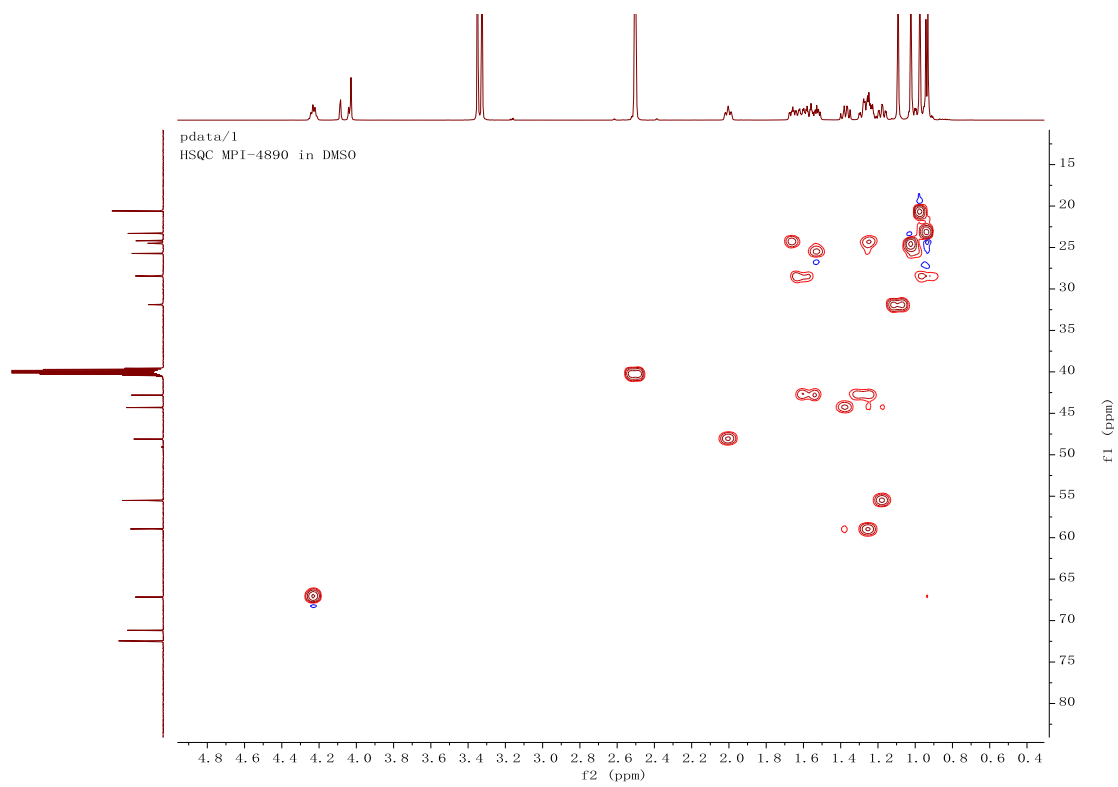

Figure S93. HSQC spectrum of the new compound **25**

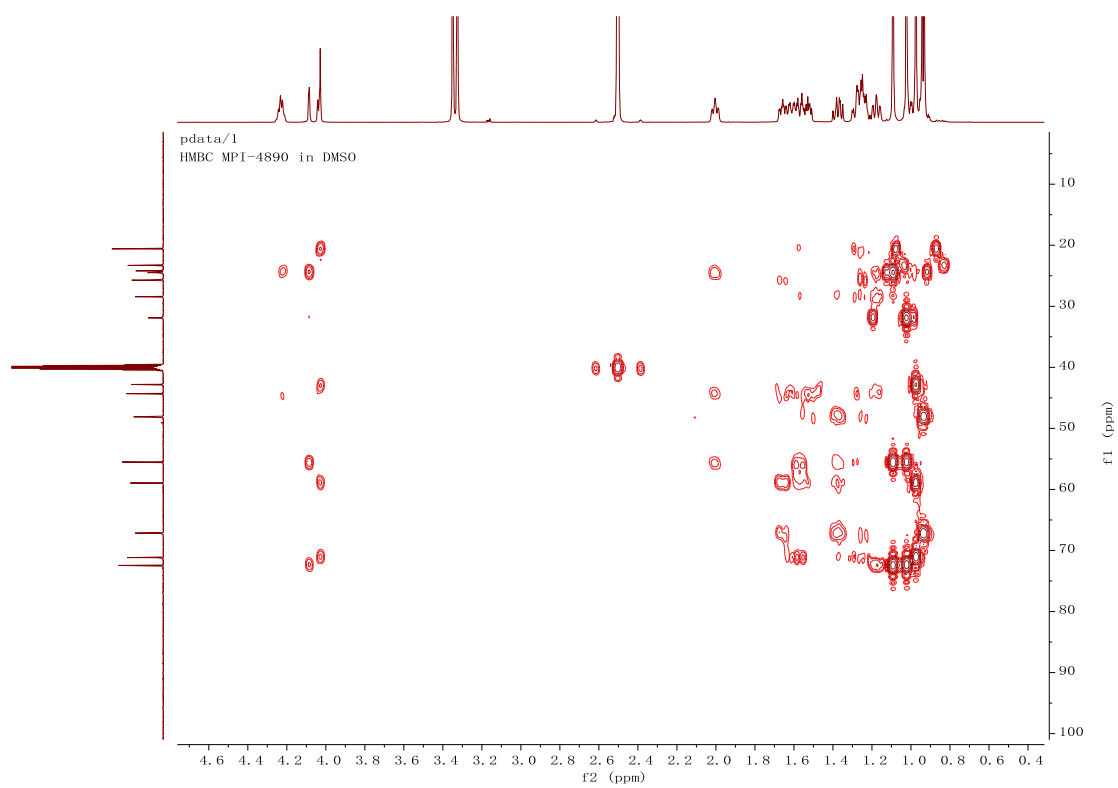

Figure S94. HMBC spectrum of the new compound **25**

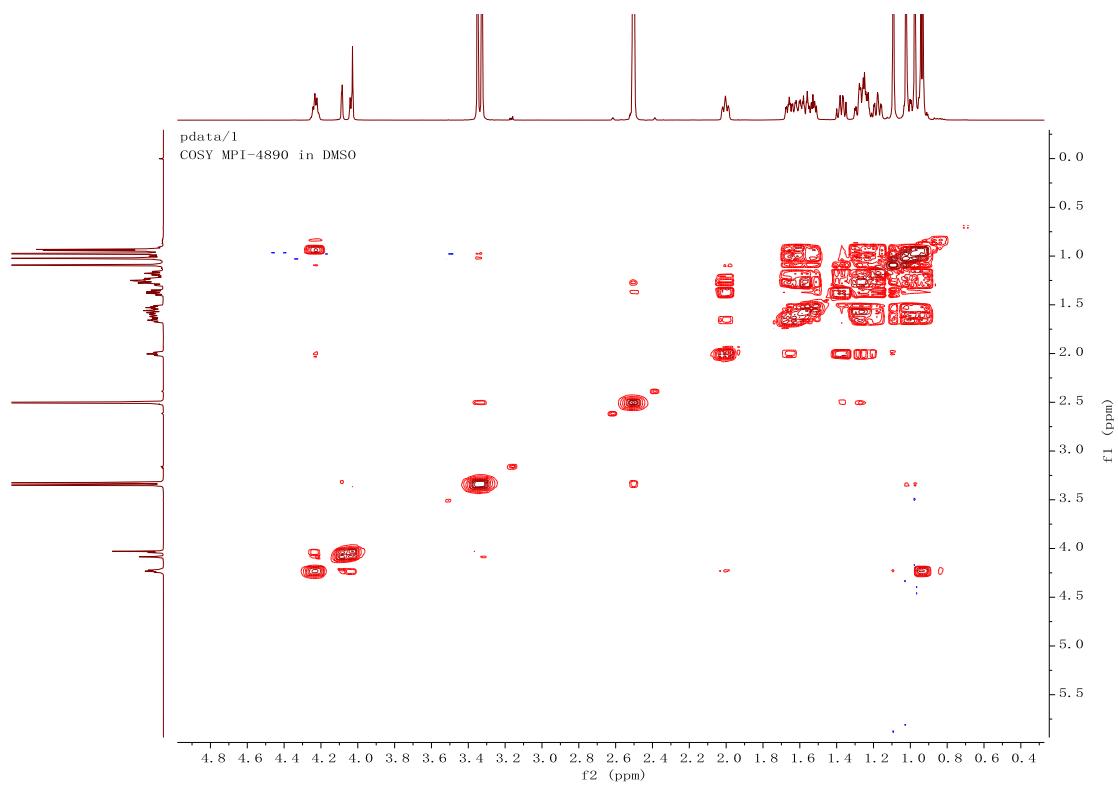

Figure S95. COSY spectrum of the new compound **25**

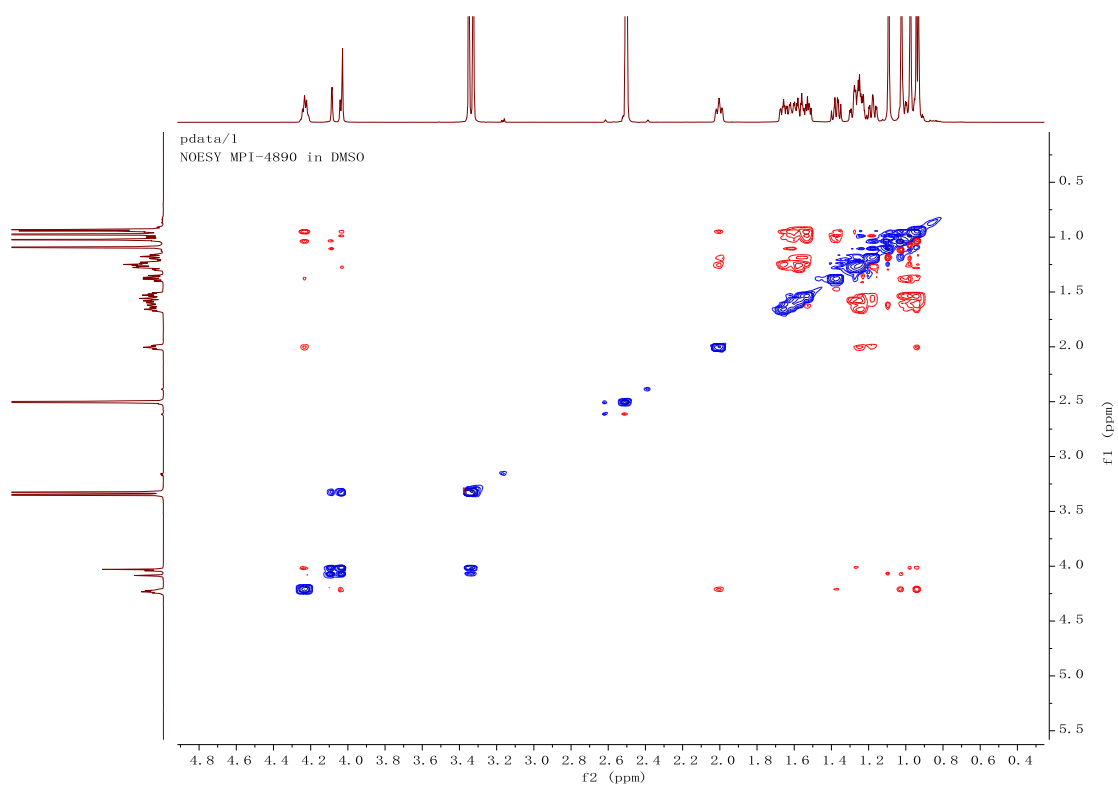

Figure S96. NOESY spectrum of the new compound **25**

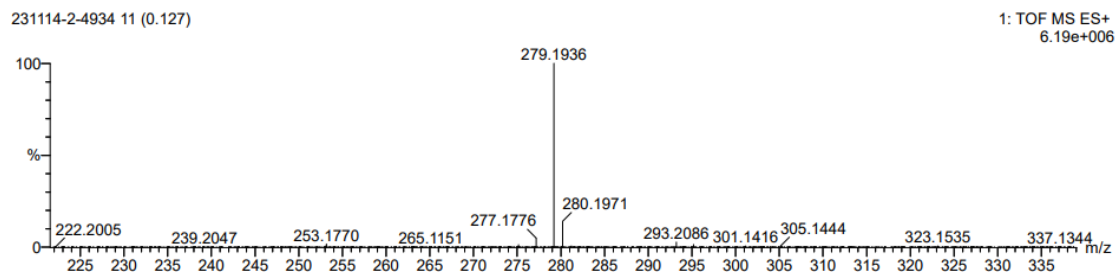

Figure S97. HRESI-MS spectrum of the new compound **26**

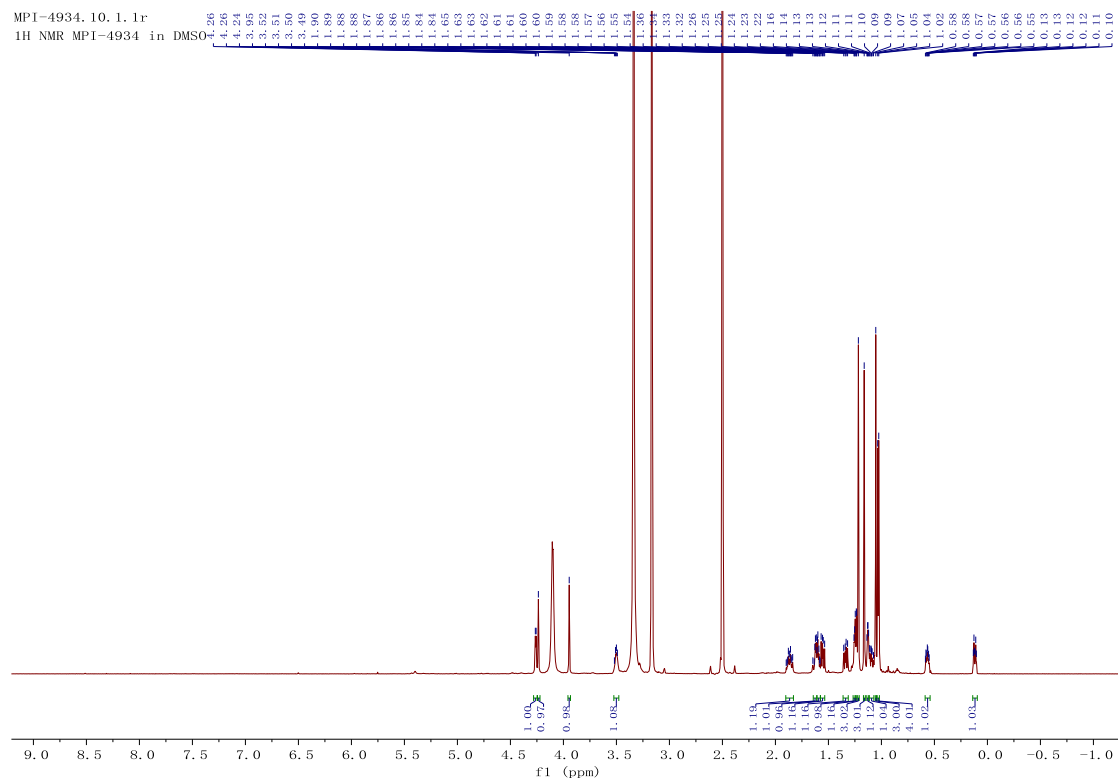

Figure S98.  $^1\text{H}$  NMR (600 MHz,  $\text{DMSO}-d_6$ ) spectrum of the new compound **26**



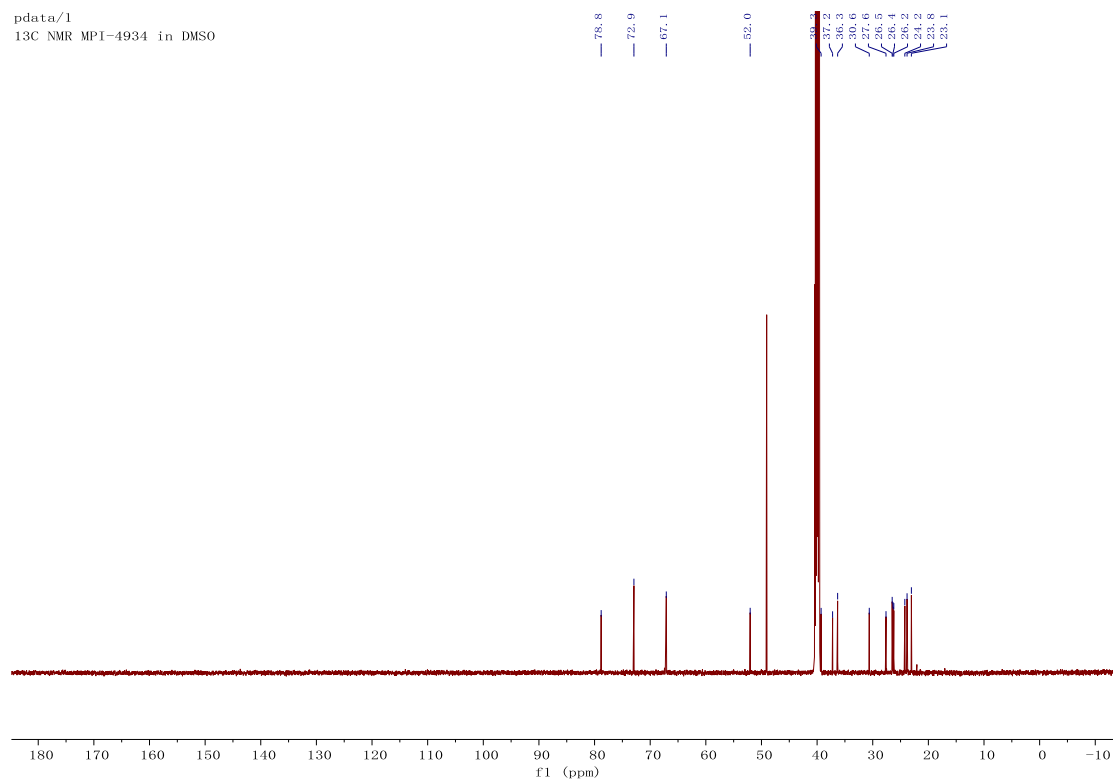

Figure S99. <sup>13</sup>C NMR (150 MHz, DMSO-*d*<sub>6</sub>) spectrum of the new compound **26**

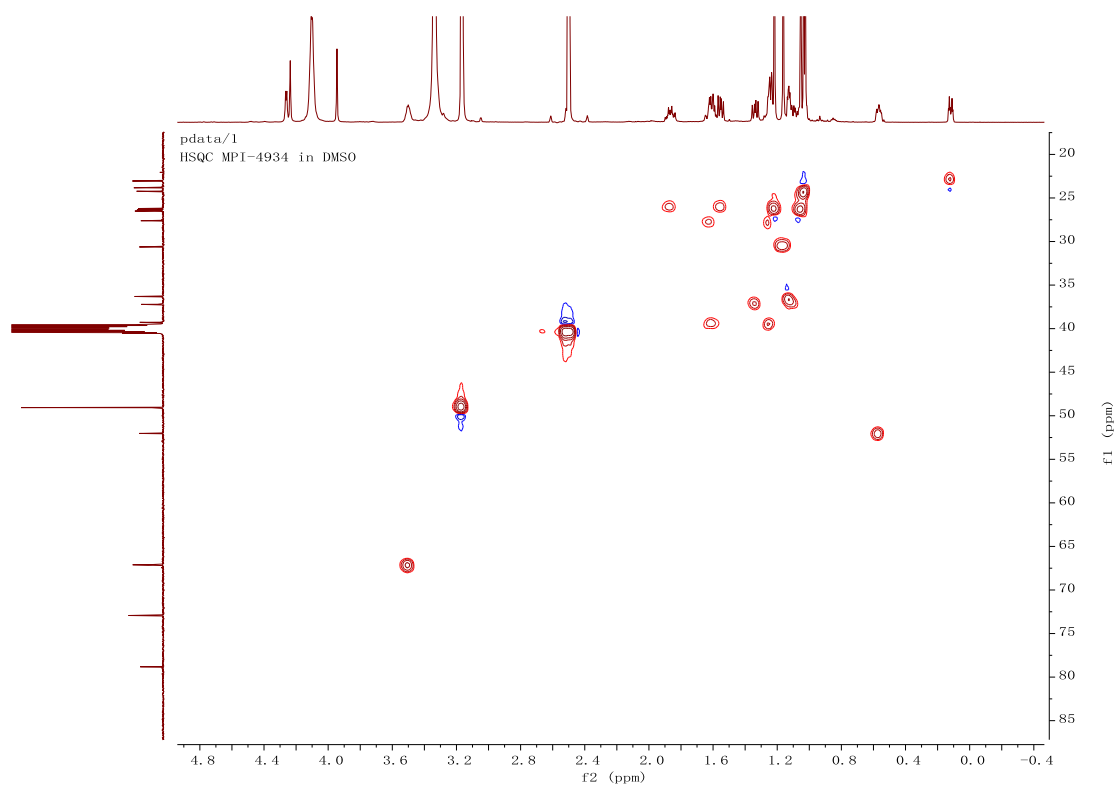

Figure S100. HSQC spectrum of the new compound **26**

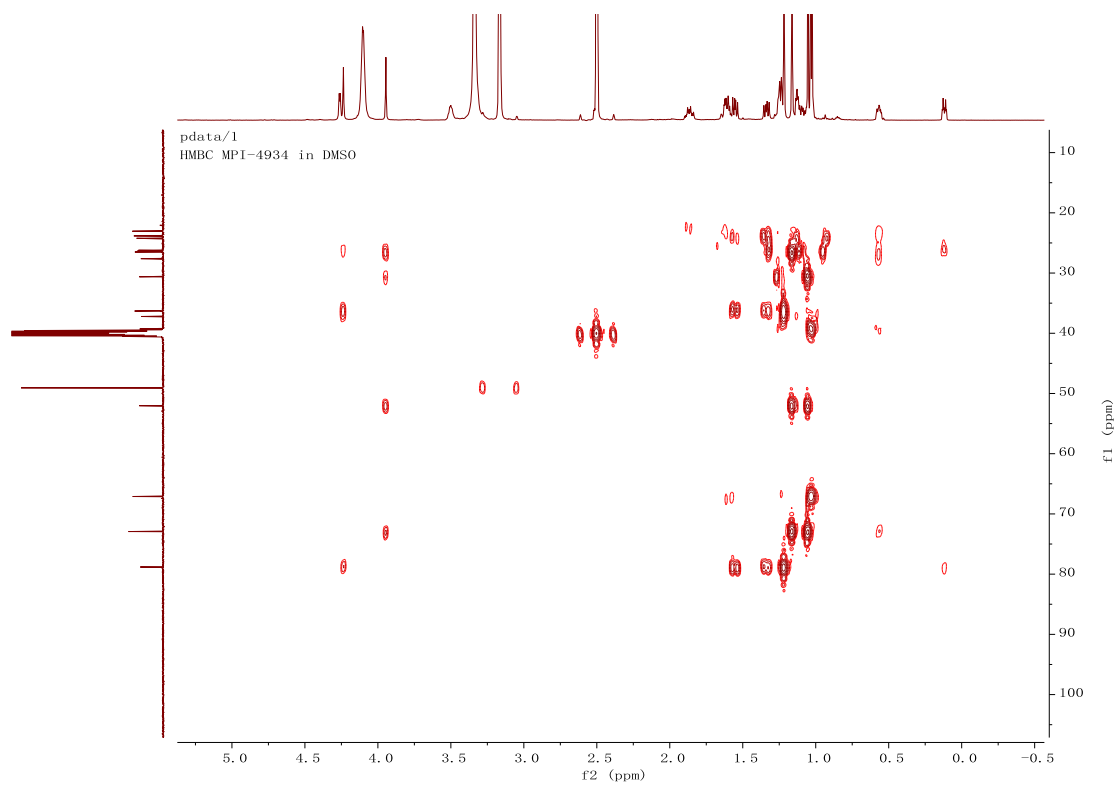

Figure S101. HMBC spectrum of the new compound **26**

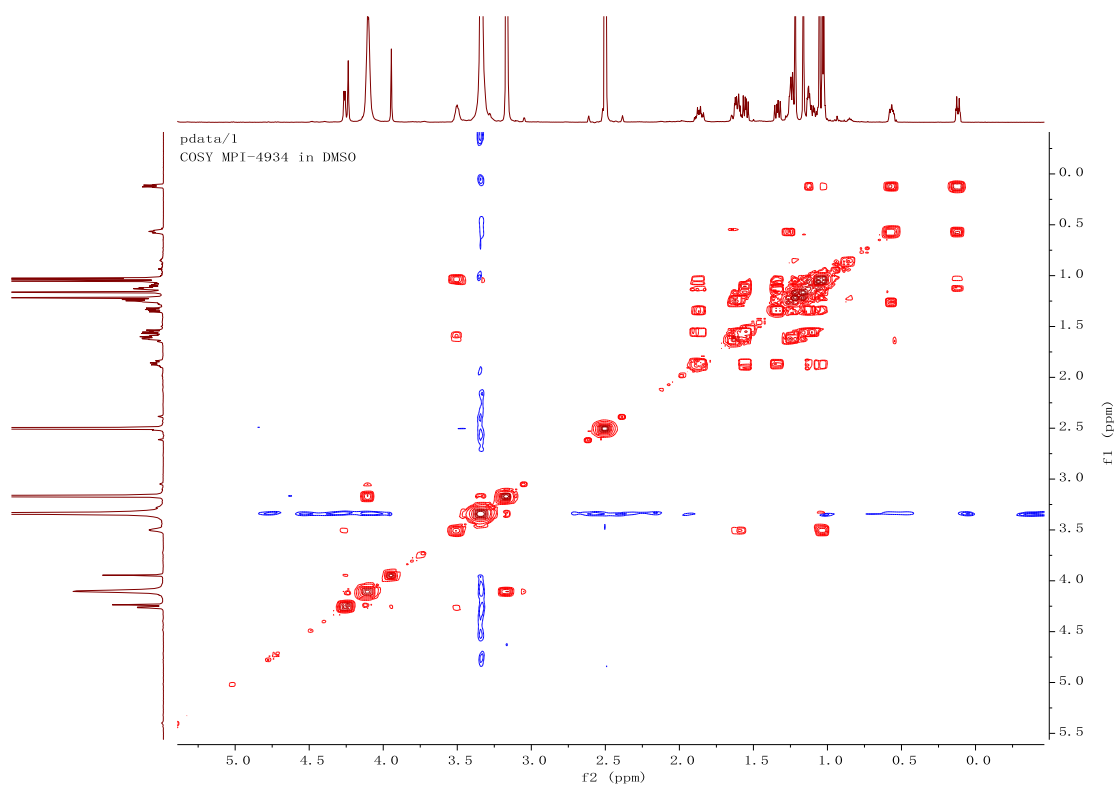

Figure S102. COSY spectrum of the new compound **26**



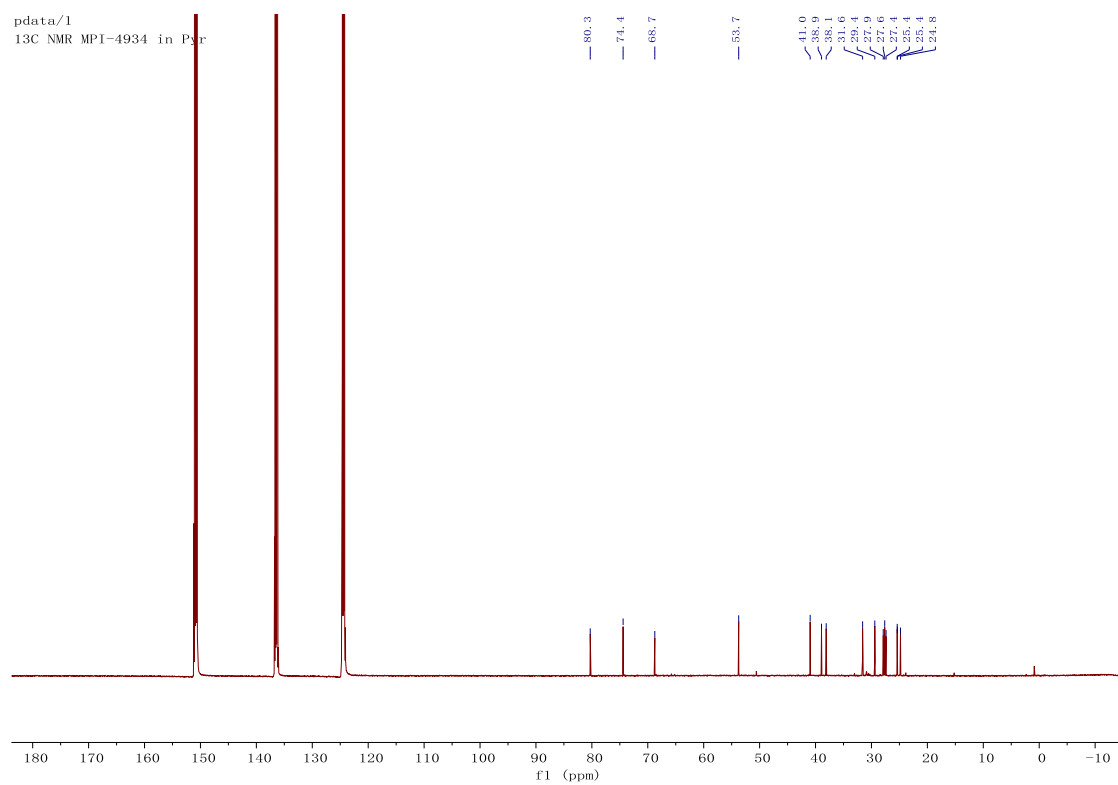

Figure S105.  $^{13}\text{C}$  NMR (150 MHz, in pyridine- $d_5$ ) spectrum of the new compound **26**

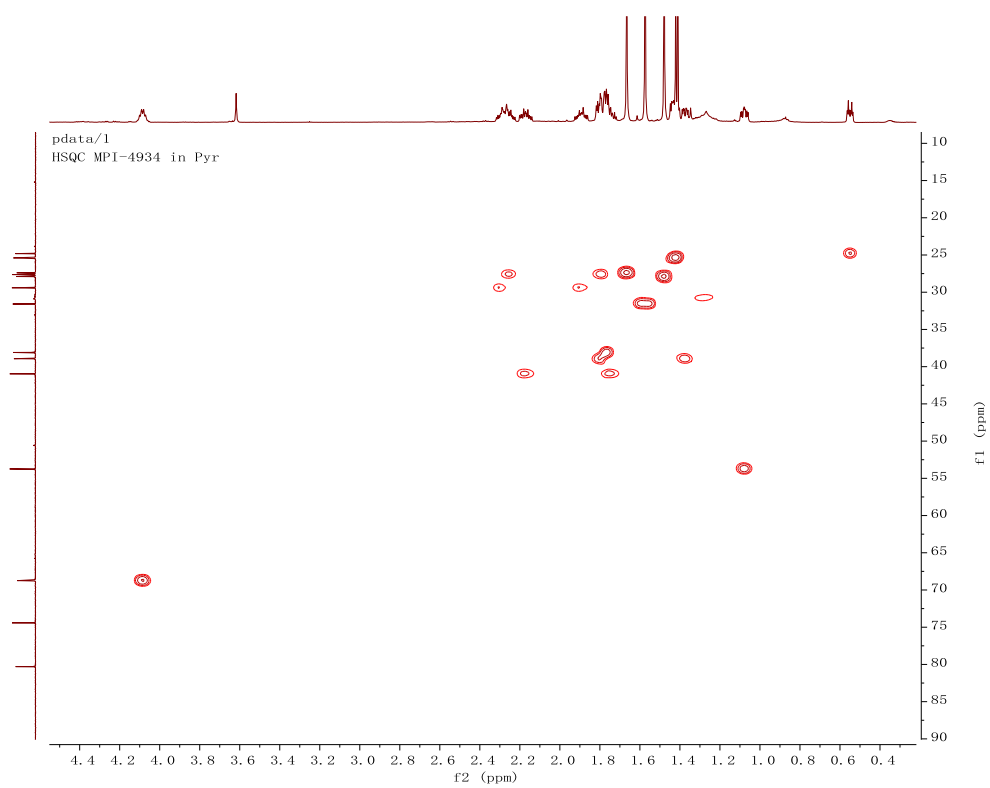

Figure S106. HSQC spectrum of the new compound **26** in pyridine- $d_5$

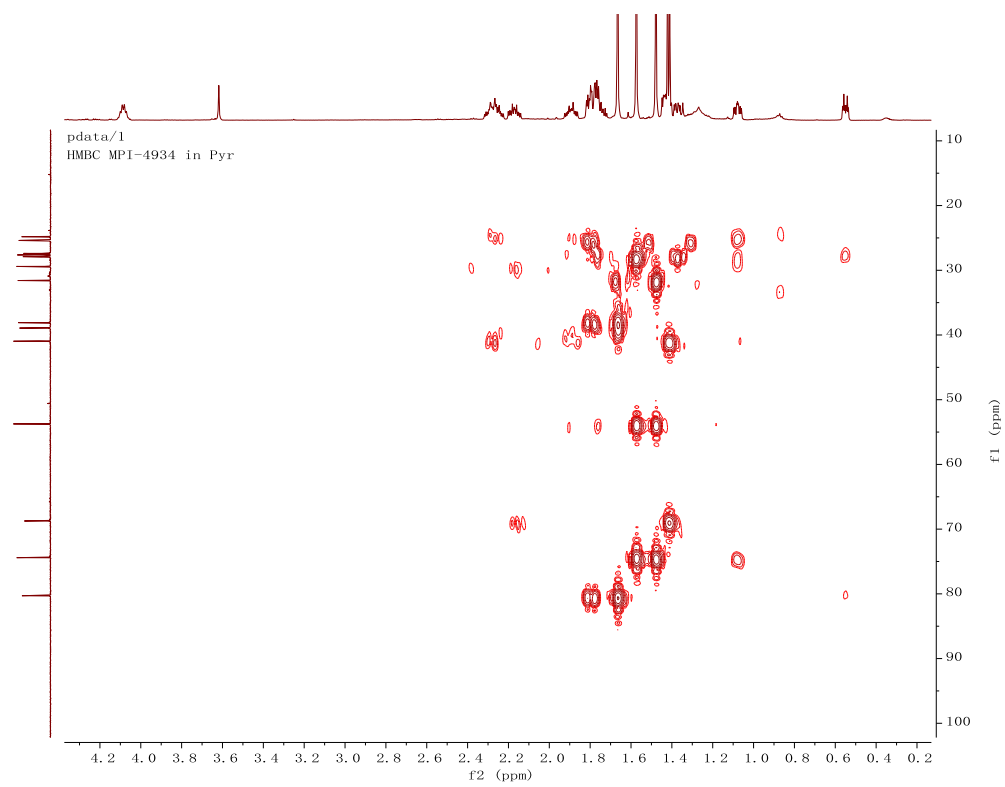

Figure S107. HMBC spectrum of the new compound **26** in pyridine-*d*<sub>5</sub>

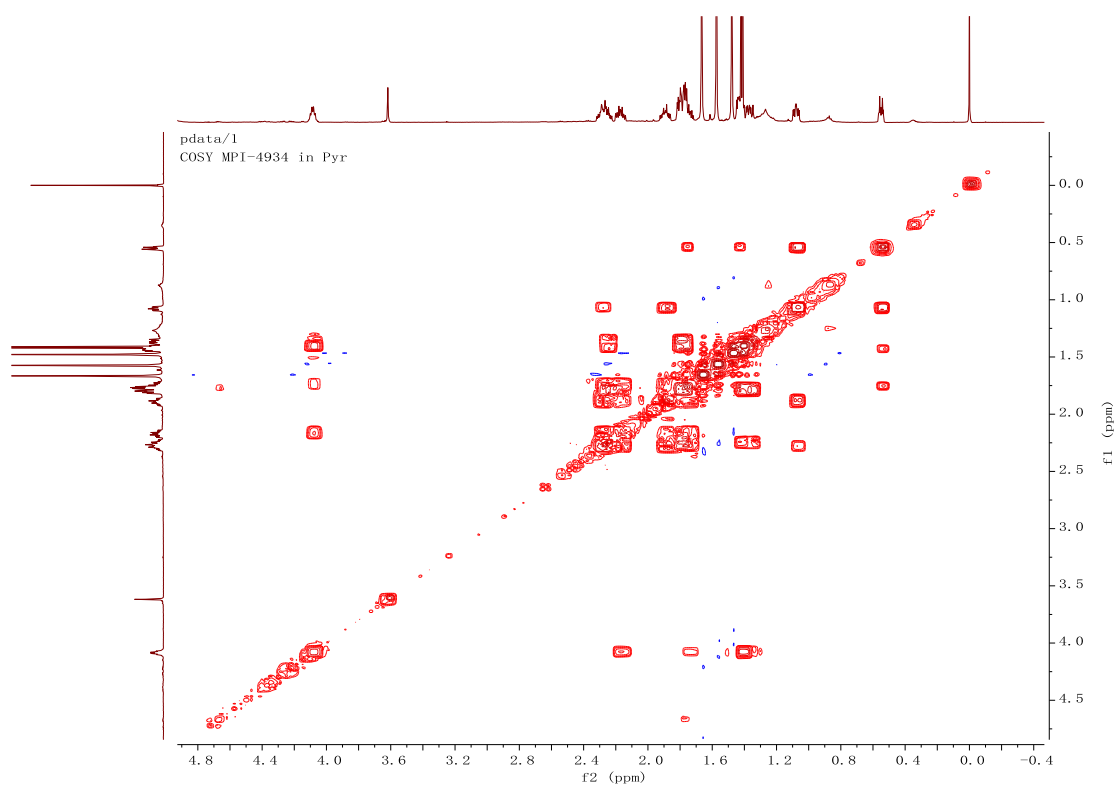

Figure S108. COSY spectrum of the new compound **26** in pyridine-*d*<sub>5</sub>

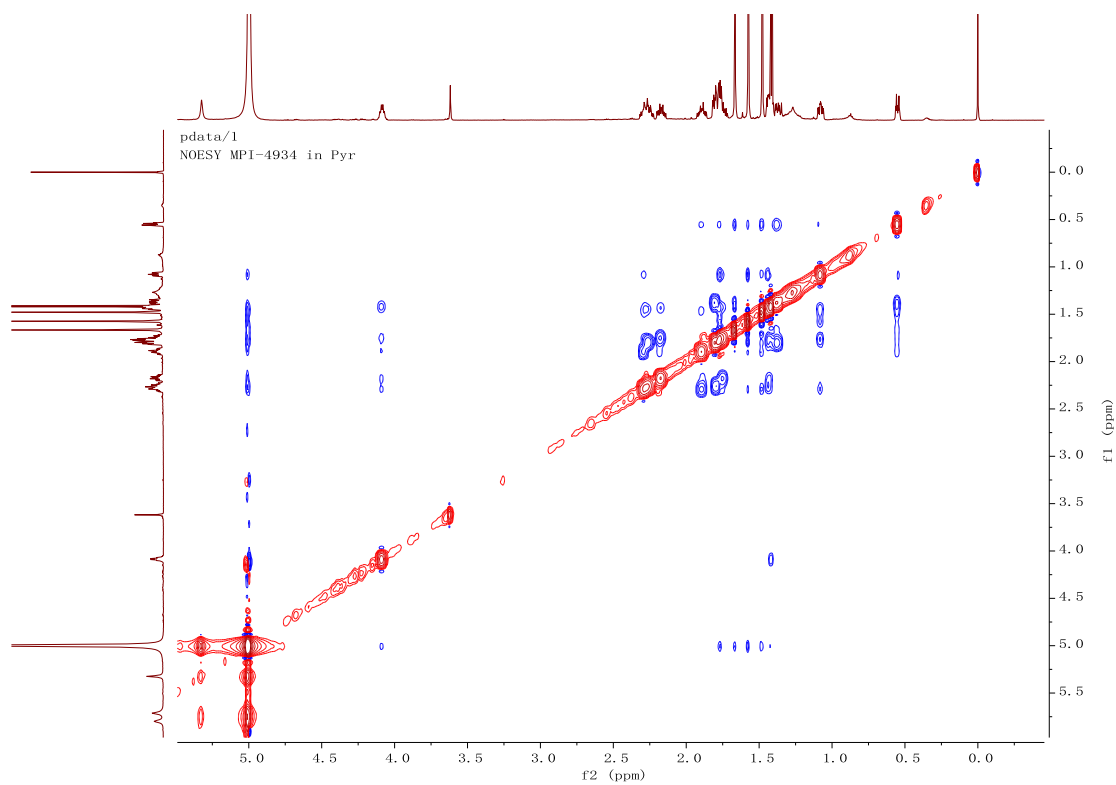

Figure S109. NOESY spectrum of the new compound **26** in pyridine-*d*<sub>5</sub>

#### User Spectra

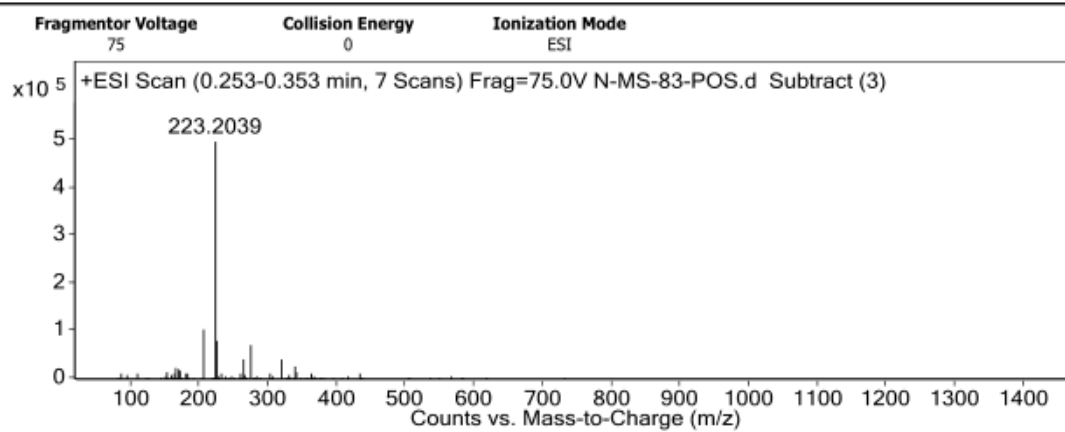

Figure S110. HRESI-MS spectrum of the new compound **27**

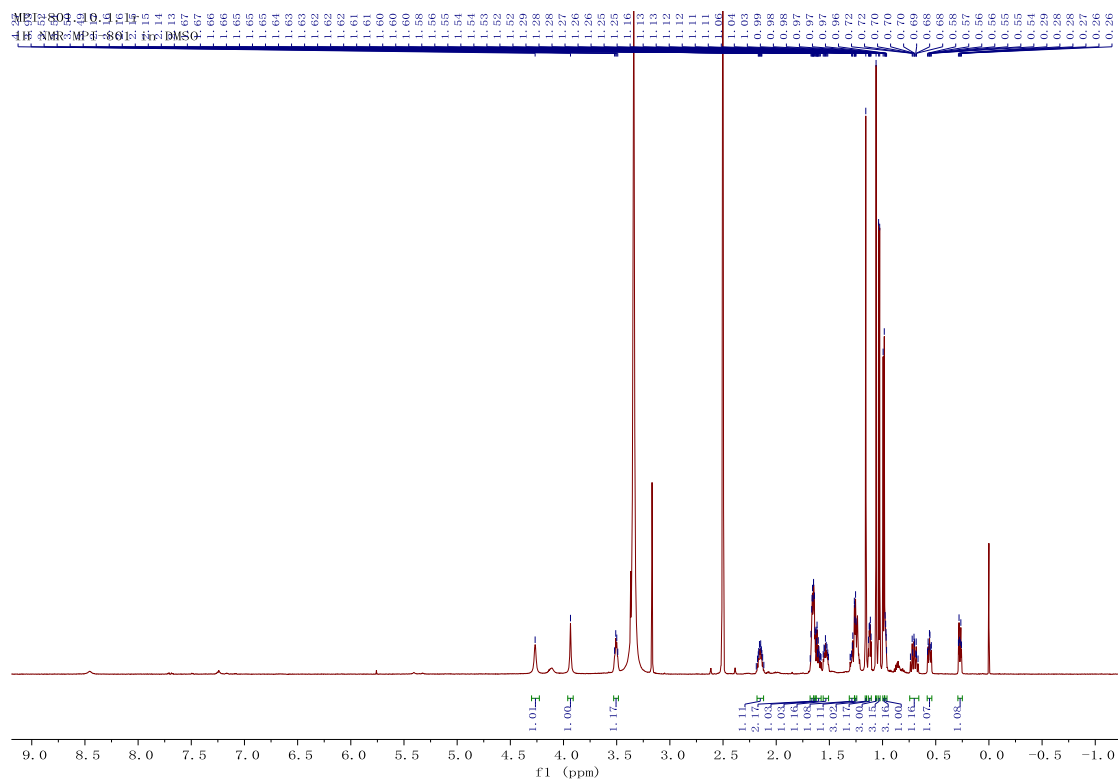

Figure S111.  $^1\text{H}$  NMR (600 MHz,  $\text{DMSO-}d_6$ ) spectrum of the new compound **27**

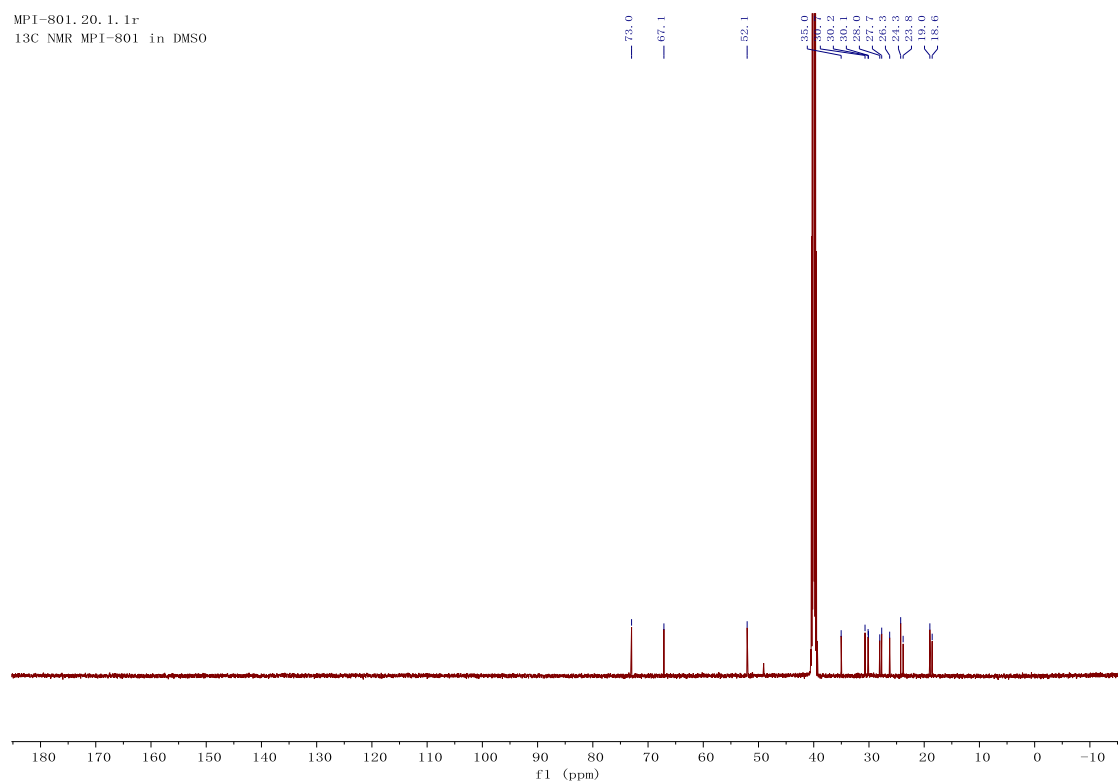

Figure S112.  $^{13}\text{C}$  NMR (150 MHz,  $\text{DMSO-}d_6$ ) spectrum of the new compound **27**

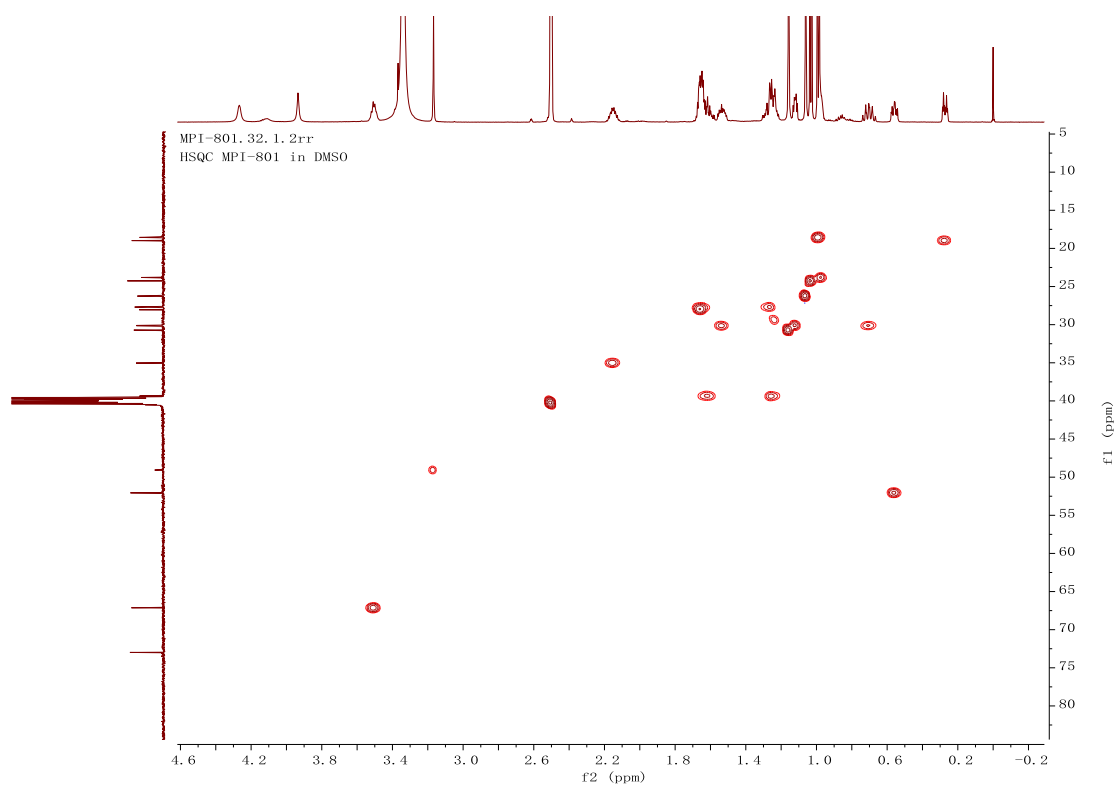

Figure S113. HSQC spectrum of the new compound **27**

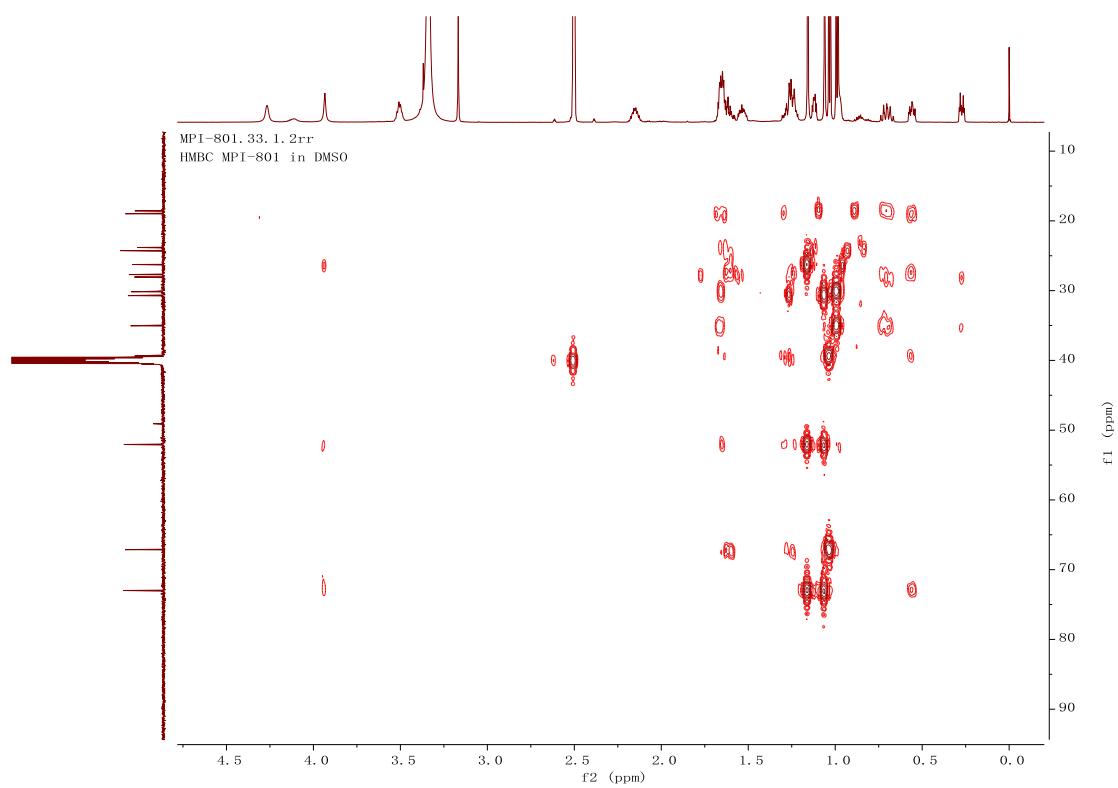

Figure S114. HMBC spectrum of the new compound **27**



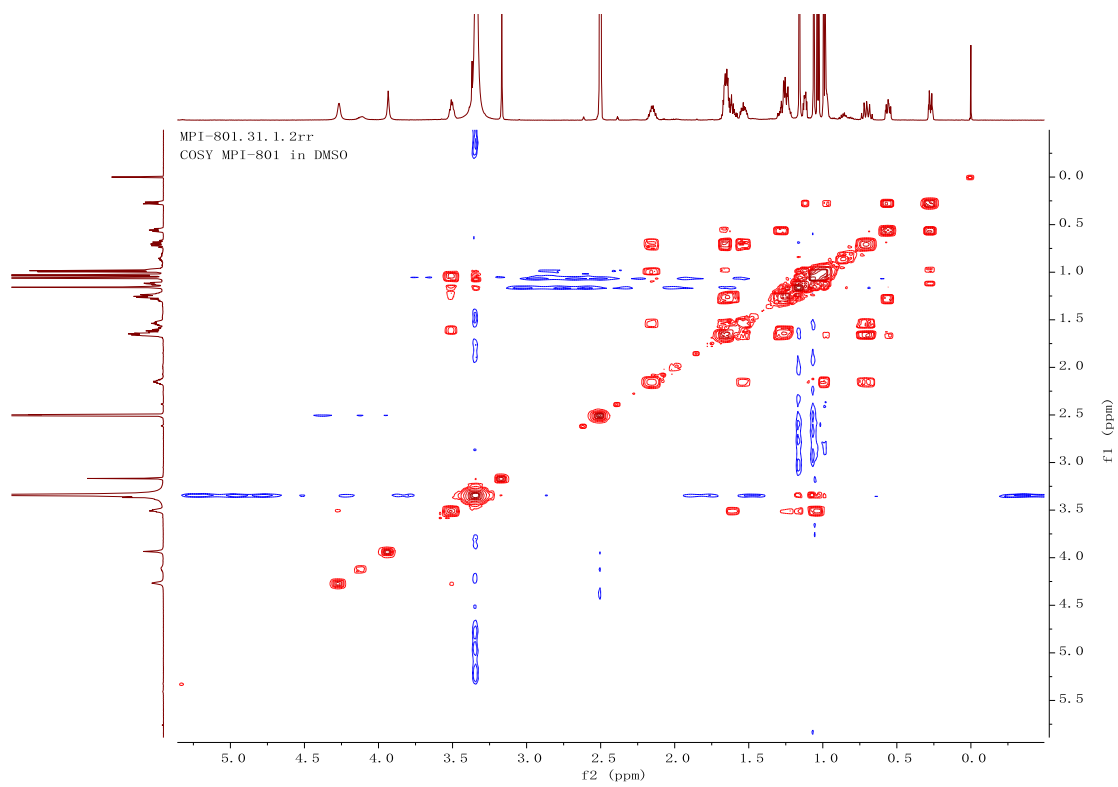

Figure S115. COSY spectrum of the new compound **27**

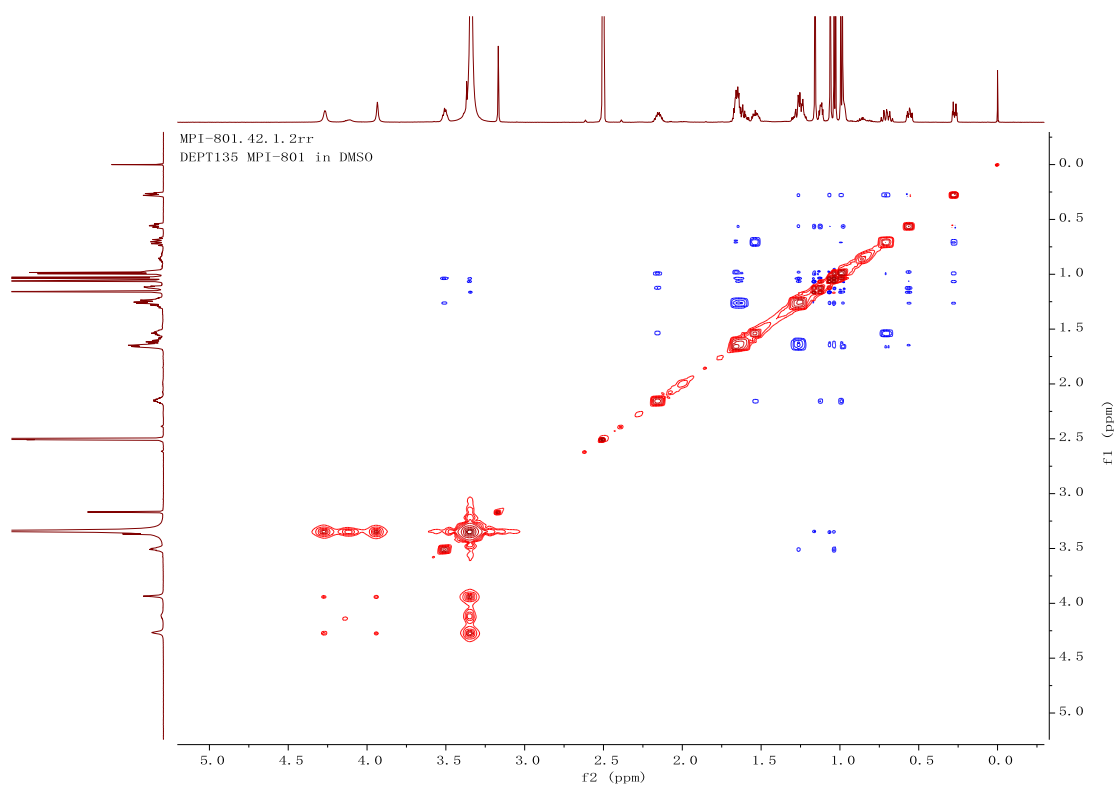

Figure S116. NOESY spectrum of the new compound **27**

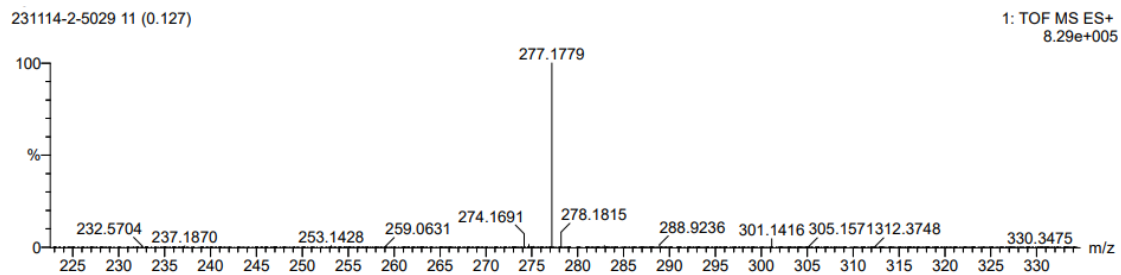

Figure S117. HRESI-MS spectrum of the new compound **28**

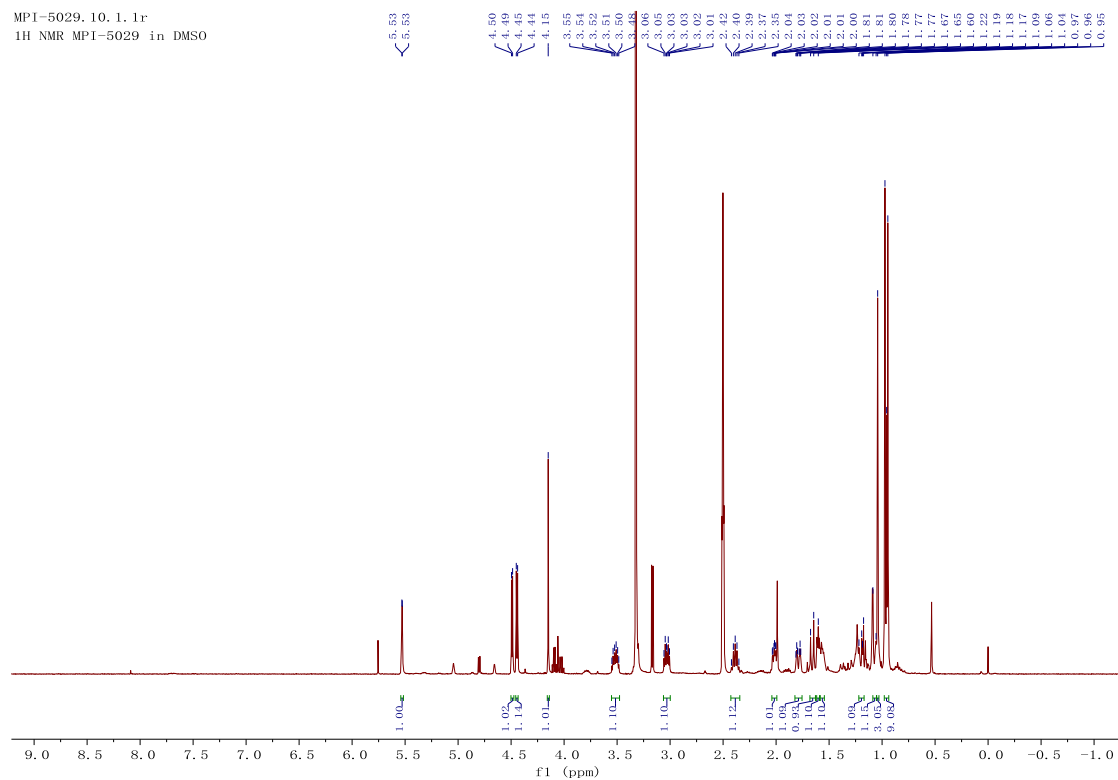

Figure S118.  $^1\text{H}$  NMR (600 MHz,  $\text{DMSO-}d_6$ ) spectrum of the new compound **28**

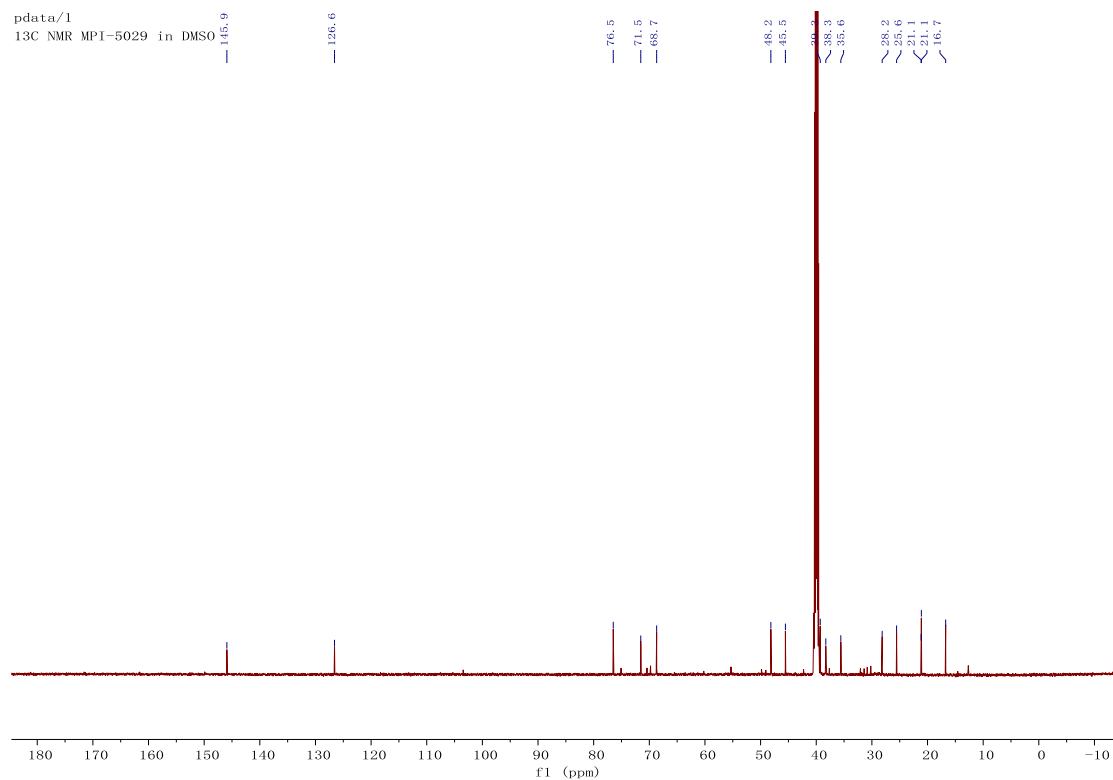

Figure S119. <sup>13</sup>C NMR (150 MHz, DMSO-*d*<sub>6</sub>) spectrum of the new compound **28**

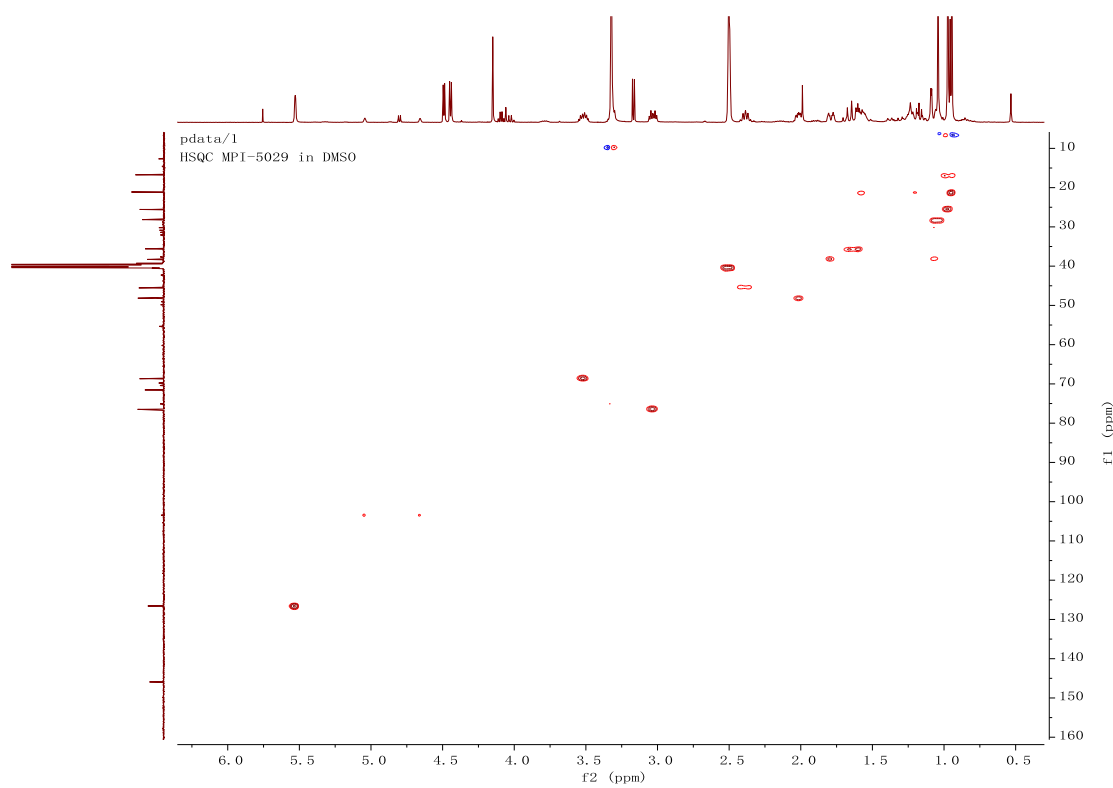

Figure S120. HSQC spectrum of the new compound **28**

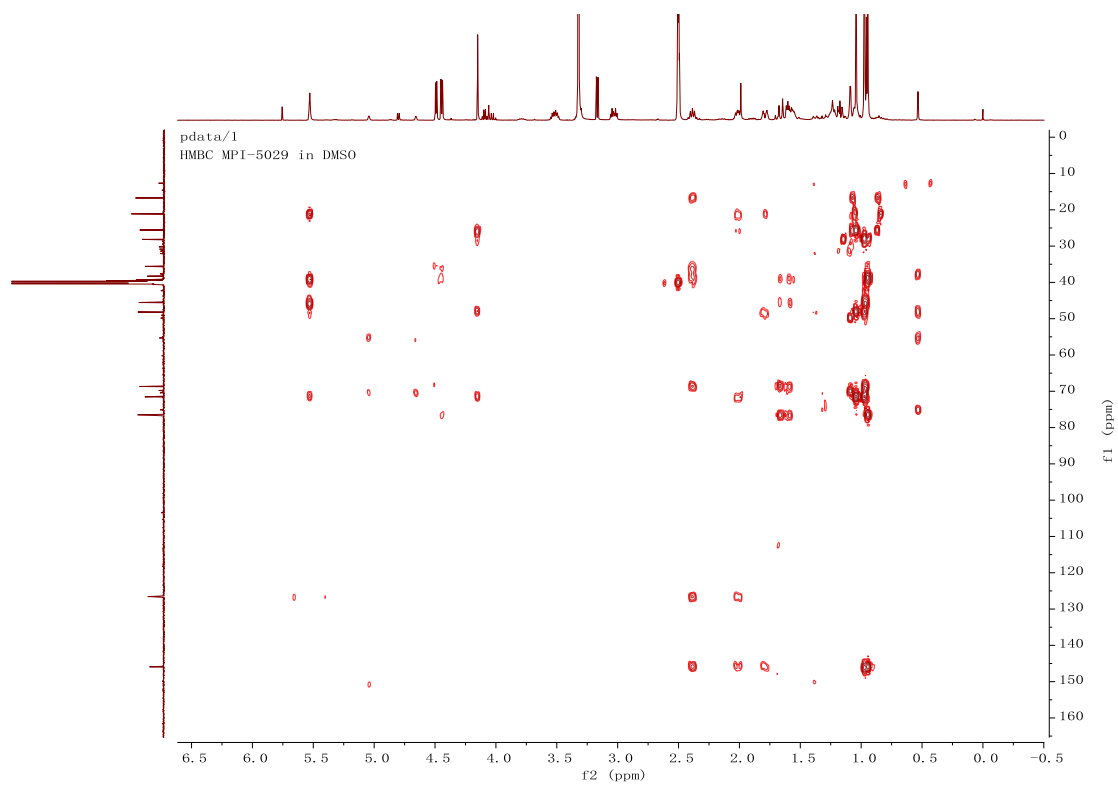

Figure S121. HMBC spectrum of the new compound **28**

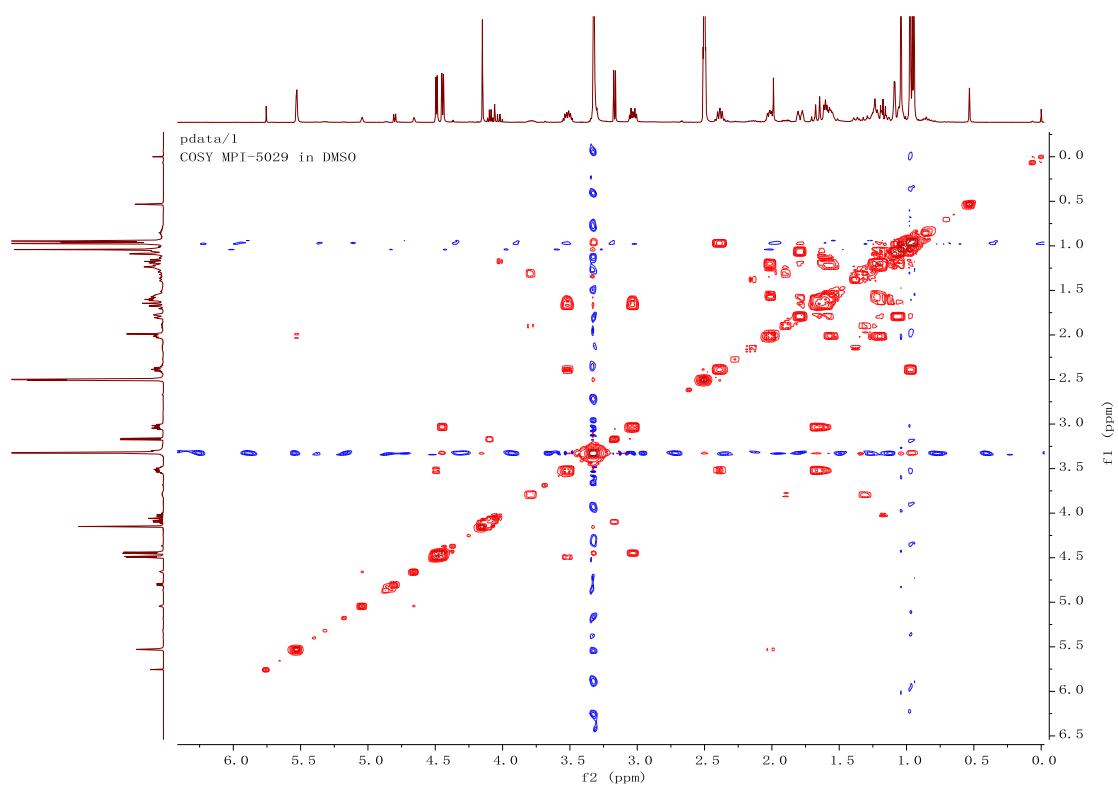

Figure S122. COSY spectrum of the new compound **28**

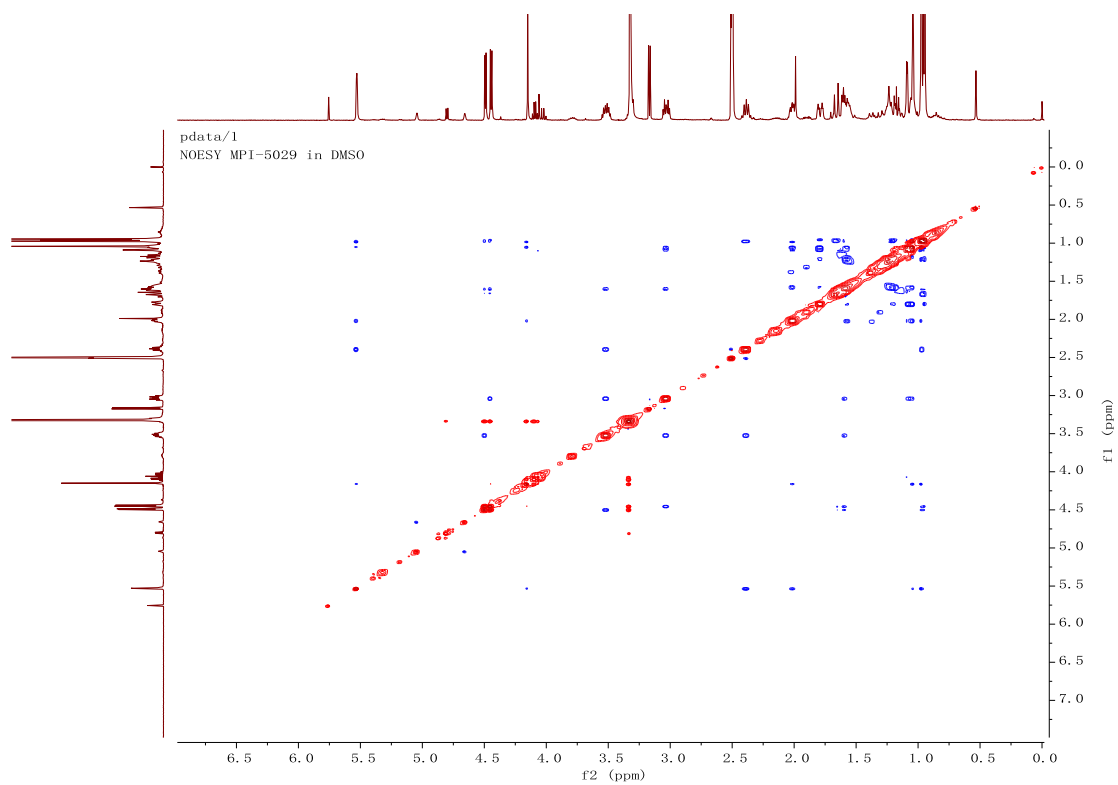

Figure S123. NOESY spectrum of the new compound **28**

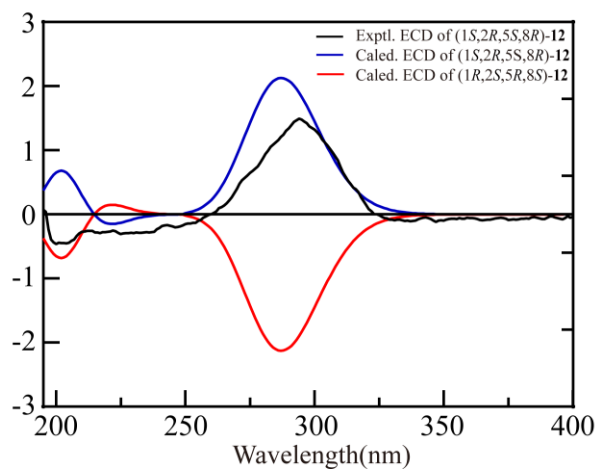

Figure S124. Experimental ECD spectra and calculated ECD spectra of compound **12**
